# 1 A new formalism for perceptual classification 2 with normative inference of internal criteria

3  
4 Heeseung Lee<sup>1</sup>, Hyang-Jung Lee<sup>1</sup>, Kyoung Whan Choe<sup>2,3</sup>, and Sang-Hun Lee<sup>1\*</sup>

5  
6 <sup>1</sup>Department of Brain and Cognitive Sciences, Seoul National University, Seoul, Korea; <sup>2</sup>Department of  
7 Psychology, The University of Chicago, Chicago, Illinois, USA; <sup>3</sup>Mansueto Institute for Urban Innovation,  
8 The University of Chicago, Illinois, USA

9  
10 For correspondence: [visionsl@snu.ac.kr](mailto:visionsl@snu.ac.kr)

11  
12  
13 **Abstract** Perceptual classification, one canonical form of decision-making, entails assigning stimuli to  
14 discrete classes according to internal criteria. Accordingly, the standard formalisms of perceptual decision-  
15 making have incorporated both *stimulus* and *criterion* as necessary components, but granted them unequal  
16 representational status, *stimulus* a random variable and *criterion* a scalar variable. This representational  
17 inconsistency obscures identifying the origins of behavioral or neural variability in perceptual classification.  
18 Here, we redress this problem by presenting an alternative formalism in which *criterion*, as a latent random  
19 variable, plays causal roles in forming *decision variable* on equal footings with *stimulus*. By implementing  
20 this formalism into a Bayes-optimal algorithm, we could predict, simulate, and explain the key human  
21 classification behaviors with high fidelity and coherency. Further, by acquiring concurrent fMRI  
22 measurements from humans engaged in classification, we demonstrated an ensemble of brain activities  
23 that embodies the causal interactions between *stimulus*, *criterion*, and *decision variable* as the algorithm  
24 prescribes.

## 25 Introduction

26 Classification, the act of assigning objects or events to discrete classes according to a criterion, is a  
27 necessary precursor to the emergence of rigorous scientific constructs (e.g., taxonomies in physics,  
28 biology, psychiatry; (*Ghiselin, 1981; Hempel, 1965*). Classification is required to generate and understand  
29 basic linguistic propositions such as predication (e.g., ‘small/large’, ‘near/far’, ‘dark/bright’; *Rips and*  
30 *Turnbull, 1980*). Mirroring these roles in science and language, classification is considered among the most  
31 fundamental of all decision-makings (*Ashby, 2001; Ashby and Ell, 2001*) and exercised countless in daily life:  
32 a weatherperson forecasts whether the upcoming summer will be cool or hot; a sommelier tells us that  
33 the wine of our choice is dry or sweet.

34 Perceptual classification<sup>1</sup>, the most basic form of classification, requires comparing a sensed  
35 quantity of a stimulus feature (e.g., ‘sensed sweetness of a particular wine’) against a criterion quantity  
36 learnt prior to comparison (e.g., ‘a typical sweetness of wines’). This means that a ‘classifying’ brain needs  
37 to form two representations, one for stimulus ( $s$ ) and the other for criterion ( $c$ ). Accordingly, these two  
38 representations are incorporated into standard formalisms for perceptual decision-making, such as the  
39 signal detection theory (*Green and Swets, 1966*).

40 These standard formalisms and their modern extensions, despite their remarkable successes in  
41 guiding behavioral and neural studies on perception (*Gold and Shadlen, 2007*), all share a fundamental  
42 inconsistency in formalizing  $s$  and  $c$ :  $s$  is a random variable that causes sensory measurements via a  
43 stochastic process whereas  $c$  is a scalar variable that is determined on a rather arbitrary basis.  
44 Consequentially, while rigorous normative algorithms have been developed for inferring  $s$  as a latent  
45 variable (*Körding and Wolpert, 2004; Petzschner et al., 2015; Pouget et al., 2013*),  $c$  has mostly been treated  
46 simply as a constant (*Fründ et al., 2014; Gold and Shadlen, 2007; Green and Swets, 1966; Meyniel et al., 2015;*  
47 *Renart and Machens, 2014; White et al., 2012*). Even when  $c$  is assumed to vary by a few descriptive models  
48 (*Benjamin et al., 2009; Fründ et al., 2014; Kepecs et al., 2008; Rahnev and Denison, 2018; Treisman and*  
49 *Williams, 1984*), it has never been treated as a latent random variable that can be inferred on a normative  
50 basis.

51 We argue that this ‘representational inconsistency’ between  $s$  and  $c$  incurs grave repercussions for  
52 the effort of identifying the sources of the neural and behavioral variabilities during perceptual  
53 classification, which radically thwarts the understanding of underlying cognitive and neural processes  
54 (*Renart and Machens, 2014*). Specifically, with the algorithms in which  $c$  is fixed to a constant, any variability  
55 in behavior or neural activity must be either attributed to  $s$  or left unexplained, but never attributed to  $c$ .  
56 On the other hand, with those in which  $c$  is allowed to vary but is determined rather arbitrarily, any  
57 observed behavior or neural variabilities are bound to be over-attributed to  $c$  owing to the unprincipled  
58 nature of  $c$  estimation.

59 To redress this representational inconsistency, the current work presents an alternative formalism  
60 in which  $c$  is also defined as a latent random variable, such that  $c$  can be inferred on a normative basis. In  
61 this new formalism, the inferred  $s$  and the inferred  $c$  jointly, on computationally equal footings with each  
62 other, cause the decision variable ( $v$ ) for classification. We will show that the new formalism not only  
63 shields classification algorithms from the aforementioned repercussions but also guides us to a normative  
64 and parsimonious account for three core properties of classification, which are readily intuited from our  
65 daily experiences but have never been quantified by previous studies.

66 To help intuit those core properties of classification, consider the scenario depicted in Figure 1;  
67 three apple farms differ in fertility (‘B(arren)’, ‘O(rdinary)’, and ‘F(ertile)’), and, on each farm, farmers have  
68 been picking apples and sorting them into ‘small’ and ‘large’ groups. The overall apple size tends to be  
69 small, medium, and large in the B, O, and F farms, respectively, and the farmers’ criteria for ‘small’ versus  
70 ‘large’ also increase in that order, which reflects the overall differences in the apple size encountered by  
71 the farmers so far (*Figure 1A*). Then, one day, the farmers visit one another’s farms and sort the apples  
72 there.

---

<sup>1</sup> We are aware that ‘classification’ and ‘categorization’ are used interchangeably. But we insist that these two tasks, despite their superficial similarity, must be distinguished because they differ in computational architecture. The implications of this distinction will be addressed in Discussion.

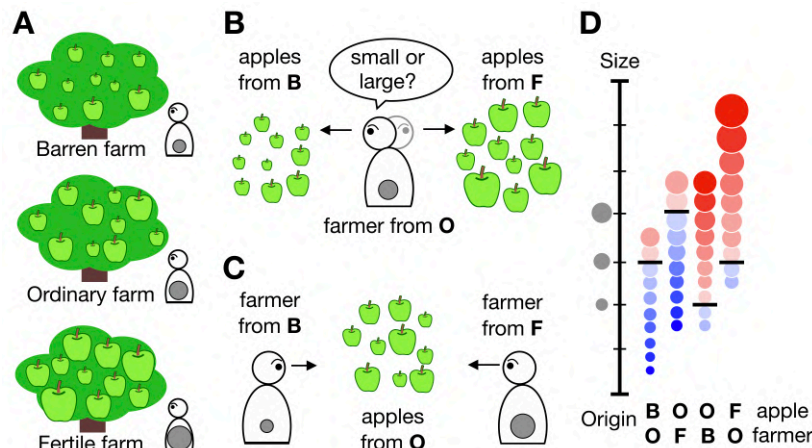

**Figure 1.** The formation, use, and consequences of criterion in an apple-sorting task (A) Farmers working at three apple farms that differ in fertility. As the farms differ in fertility, the three farmers experience apples of different sizes and form different criteria based on the typical apple size experienced (denoted by gray circles). (B) Example cases where the apples from different farms are sorted by the same farmer. The farmer from the Ordinary farm judges the apples from the Barren and Fertile farms as mostly ‘small’ and ‘large’, respectively, by comparing the apple sizes against her “medium-size” criterion. (C) Example cases where the apples from the same farm are sorted by different farmers. Due to the different criteria, apples from the Ordinary farm are mostly judged as ‘large’ by the farmer from the Barren farm and ‘small’ by the farmer from the Fertile farm. (D) Distributions of decisions and uncertainties for the four cases shown in (B) and (C). The black horizontal bars indicate the criteria, and the size of circles represents the size of apples. The hue and saturation of circles represent decision identity (blue for ‘small’, red for ‘large’) and uncertainty (increasing desaturation with increasing uncertainty), respectively.

First, imagine that the farmer from O farm sorts the apples from B farm (‘B by O’) or the apples from F farm (‘F by O’; **Figure 1B**). Farmer O is likely to classify apples as ‘small’ in B farm and ‘large’ in F farm, because apple sizes mostly fall below and above the farmer’s criterion, respectively. The farmer’s decision uncertainty also varies from apple to apple, becoming increasingly uncertain as the apple size falls closer to her criterion. This exemplifies the contribution of  $s$  to  $v$ , decision variable, when  $c$  is fixed (**Figure 1D**). Next, imagine that apples from O farm are sorted by the farmer from F farm (‘O by F’) or by the farmer from B farm (‘O by B’; **Figure 1C**). This exemplifies the contribution of  $c$  to  $v$ : the very same apples will be sorted differently, and with different degrees of uncertainty, depending on who sorts them (**Figure 1D**). Intriguingly, different pairings bespeak the relativity of classification in which decision and its uncertainty are determined not by an absolute quantity of  $s$  but by the relative quantity of  $s$  to  $c$ . For example, the ‘B by O’ and ‘O by F’ cases differ both in absolute apple size and in farmer, but are similar in decision fraction and uncertainty distribution (**Figure 1D**). This is because the differences in  $s$  are compensated by the differences in  $c$ .

The above scenario spells out three intuitions: (i)  $c$  varies according to past experiences of  $s$ ; (ii)  $s$  and  $c$  have respective causal contributions to the formation of  $v$ ; (iii) interplays between  $s$  and  $c$  realize the relativity of classification. To demonstrate how our new formalism offers a normative and quantitative account for these three intuitions, we concurrently acquired behavioral responses and functional magnetic resonance images (fMRI) from human brains engaged in a perceptual classification task that mimics the apple-sorting scenario, and proceeded as follows. First, by implementing our new formalism in the Bayesian framework (*Griffiths et al., 2012; Sheth et al., 2012*), we developed a generative model that people would adopt to perform the task, which incorporates  $c$  as a latent variable whose trial-to-trial states are inferred from recent experiences of stimuli. Then, we showed that Bayes-optimal classifiers with that generative model actualize the three intuitions, and that their behaviors well matched the actual classification behaviors of people. We further replicated the predictions of criterion inference in diverse variations of task conditions. Lastly, by searching the entire brain with multivariate pattern analysis on fMRI measurements, we identified a set of brain regions within which activity patterns signal the trial-to-trial states of  $s$ ,  $c$ , and  $v$ , respectively, and further showed that each of those brain signals satisfy the causal relations with the remaining variables in our model. We concluded by discussing how conferring of the just formalism on ‘internal criterion’ can elucidate the cognitive and neural processes underlying perceptual classification.

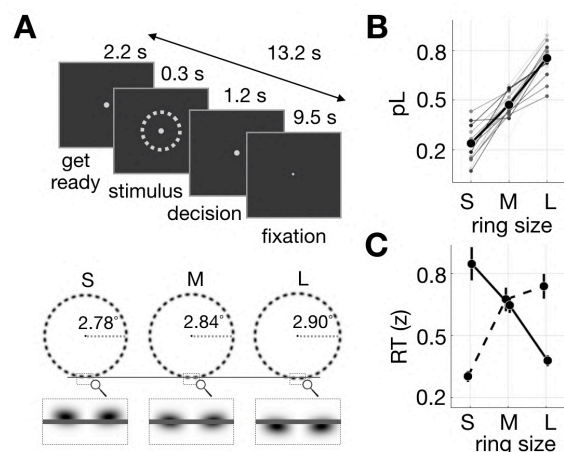

**Figure 2.** Task and behavioral measures. (A) Ring size classification task. On each trial, observers briefly viewed a ring stimulus and classified it as ‘small’ or ‘large’ within 1.2 s after stimulus onset while fixating on a spot on the display. Three ring stimuli that were slightly different in size were presented in a random order. The luminance polarity of the ring images at the bottom is reversed here for illustrative purposes. (B) Proportion of ‘large’ decisions (pL) as a function of ring size. Bold and thin markers, pLs for the mean and individual observers, respectively. (C) Z-scored RT plotted against ring size. Dashed and solid lines represent data from trials on which ‘small’ and ‘large’ decisions were made, respectively. (B, C) Circles and error bars indicate the mean and standard error of the mean across observers, respectively.

## Results

### Ring-size classification

Over consecutive trials, observers sorted rings by size into two classes, ‘small’ and ‘large’, under moderate time pressure (Figure 2A). Rings of three marginally different radii were used to ensure that decisions were made with uncertainty. Observers were not informed about the actual number of ring sizes. Observers were trained intensively with trial-to-trial feedback until reaching an asymptotic level of performance (~6,000 trials/observer) before the main fMRI experiment. We expected this intensive training to help observers understand the presence of ‘veridical criterion’ that determines correct and incorrect responses and to minimize possible behavioral and neural variabilities due to perceptual learning (Kahnt et al., 2011a; Li et al., 2004; Pourtois et al., 2008; Schwartz et al., 2002). These training sessions also allowed us to define the threshold (70.7% correct) ring sizes tailored for individuals (see Methods for details). Considering the possibility that ‘correct’ and ‘incorrect’ feedback events evoke the brain activities associated with rewards (Carlson et al., 2011; Marco-Pallarés et al., 2007) or errors (Carter et al., 1998; Cavanagh and Frank, 2014; Holroyd et al., 2004), we did not provide observers with trial-to-trial feedback during the fMRI runs. Instead, we provided observers with run-to-run feedback by showing the proportion of correct responses at the end of each run of 26 trials. The levels of task performance (mean=75.7%, SD=6.3%) were consistent with the level of performance aimed by the training sessions, supporting that observers were likely to carry out the task with run-to-run feedback as they did with trial-to-trial feedback.

The contributions of stimuli to decision and uncertainty were summarized by plotting the proportion of ‘large’ decision (pL) and response time (RT), which is often considered as a behavioral proxy of decision uncertainty (Palmer et al., 2005; Ratcliff and McKoon, 2008; Urai et al., 2017), against ring size (Figure 2B,C). The pL and RT of ‘large’ decisions decreased as the ring size increased, and vice versa (pL,  $\beta = 0.99$  ( $P = 6.6 \times 10^{-44}$ ) by logistic regression; RT,  $\beta = -0.17$  ( $P = 8.8 \times 10^{-13}$ ) for ‘large’  $\beta = 0.19$  ( $P = 2.4 \times 10^{-16}$ ) for ‘small’ decisions by linear regression).

### Criterion-inference model

The generative model, an observer’s causal account for how their sensory measurements are generated, is as follows: on a trial  $t$ , the true size  $Z_{(t)}$  is randomly sampled from a prior distribution  $p(Z)$ , and the observer’s sensory measurement  $m_{(t)}$  is another noisy sample from a likelihood distribution  $p(m|Z)$  centered around  $Z_{(t)}$  (Figure 3A; see Methods). The size classification task, splitting population size values into small and large halves, can be defined as judging whether  $Z_{(t)}$  is larger or smaller than  $\tilde{Z}$ , the median of the true ring sizes shown over all trials. Because the observer can access only

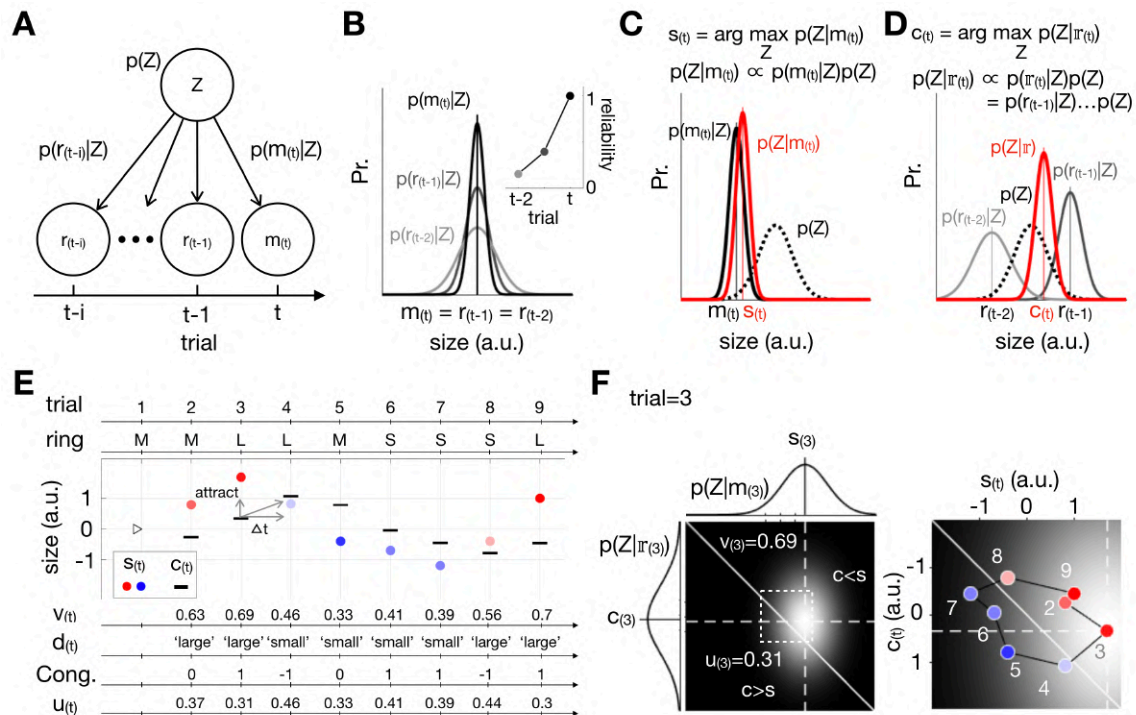

**Figure 3. Criterion-inference model.** (A) Generative model. Arrows indicate conditional dependencies.  $Z$ , stimulus size.  $m(t)$ , noisy observation on a current trial  $t$ .  $r_{(t-i)}$ , noisy observation retrieved from a past trial  $t - i$ . (B) Increases in measurement noise over trials. A likelihood function over ring size encodes the most likely value of  $Z(t)$  and its uncertainty, which increases as trials elapse. Reliability is the reciprocal of variance of the likelihood. (C) Bayesian inference for a current stimulus,  $s$ . A posterior function (red) represents  $s(t)$  and its uncertainty. (D) Bayesian inference for criterion,  $c$ . A posterior function (red) represents  $c(t)$  and its uncertainty. (E) Illustration of decision episodes over trials. On the stimuli presented by an experimenter, an observer makes decisions by comparing  $s$  (colored dots) against  $c$  (black bars), which is updated continuously over trials.  $v(t)$ , decision variable, represents  $p(s(t) > c(t))$ . The sign of ' $v(t) - 0.5$ ' determines  $d(t)$ , binary decision (color hue of dots): 'large' when positive and 'small' when negative. The absolute value of ' $v(t) - 0.5$ ' inversely reflects  $u(t)$ , decision uncertainty (color desaturation of dots): the greater  $u(t)$ , the more uncertain a decision. Cong., congruence of  $d(t)$  with ring size; 1, -1: correct/incorrect; 0: M-ring. Note that  $c(t)$  appears to chase after  $s_{(t-1)}$  as indicated by small arrows. (F) Decision processes shown in a bivariate decision space. Left, a decision episode captured on trial 3 in (E). The bivariate conjugate of  $p(Z|m(3))$  and  $p(Z|r(3))$  determines  $v(3)$  with its fraction above the identity line and  $u(3)$  with its fraction in the opposite side of the identity line to where  $s(t)$  and  $c(t)$  are located. The light intensity corresponds to probability density. Right, pairs of  $s(t)$  and  $c(t)$  shown in (E) are replotted to illustrate that  $s_{(t-1)}$  attracts  $c(t)$  in the zoomed-in decision space, which is demarcated by the dotted box in the left panel. The numbers in the panel indicate the trial numbers of  $s(t)$  and  $c(t)$  pair shown in (E). **Figure 3-figure supplement 1** and Methods illustrate the procedure of model fitting to human observers. See also **Figure 3-figure supplement 1**. **Figure 3-figure supplement 1: Estimation of model parameters and confidence intervals.**

the measured sizes of stimuli encountered so far, the Bayes-optimal solution is to infer  $Z(t)$  and  $\hat{Z}(t)$ , which corresponds to inferring  $s$  and  $c$  from a limited set of noisy measured sizes  $\{m(1), m(2), \dots, m(t)\}$ . We modeled both  $Z$  and  $m$  as Gaussian random variables, and each was parameterized by the mean and standard deviation (SD). Critically, we assumed that there exists an additional source of noise arising from imperfect memory retrieval; the likelihood distribution becomes less reliable as trials elapse (**Figure 3B**). To distinguish from the likelihood of  $Z$  for the current-trial measurement  $p(m(t)|Z)$ , we denoted the likelihood of  $Z$  for the measurement 'retrieved' from an elapsed trial  $t - i$  by  $p(r_{(t-i)}|Z)$  and assumed that its precision increases as trials elapse (*Gorgoraptis et al., 2011; Zokaei et al., 2015*), as represented by the widening curves shown in **Figure 3B**.

On each trial, the Bayes-optimal classifier infers  $s$  and  $c$  by inversely propagating  $\{\dots, r_{(t-2)}, r_{(t-1)}, m(t)\}$  over the generative model. The inferred size  $s(t)$  is the most probable value of  $Z$  given the measurement on a current trial, as captured by the following equation :

$$s(t) = \hat{Z}(t) = \arg \max_Z p(Z|m(t)) \propto \arg \max_Z p(m(t)|Z)p(Z) \quad (\text{Equation 1})$$

194 , where the variance of the posterior reflects the precision of  $s_{(t)}$  (**Figure 3C**; see Methods). On the other  
195 hand, the inferred  $c_{(t)}$ , which corresponds to the inferred value of  $\tilde{Z}$ , is the most probable value of  $Z$  given  
196 the measurements over elapsed trials, as captured by the following equation:  
197

$$c_{(t)} = \hat{Z}_{(\dots, t-2, t-1)} = \arg \max_Z p(Z | \mathbb{r}_{(t)}) \\ \propto \arg \max_Z p(\mathbb{r}_{(t)} | Z) p(Z) \quad (\text{Equation 2})$$

198  
199  
200 , where  $\mathbb{r}_{(t)} = \{\dots, r_{(t-2)}, r_{(t-1)}\}$  (see Methods). Here, the variance of the posterior, which reflects the  
201 precision of  $c_{(t)}$ , is the optimally weighted sum of variances of the retrieved measurements and the prior  
202 size (**Figure 3D**). **Equation 2** implies that  $c_{(t)}$  is more attracted towards a recent stimulus than to older ones,  
203 because of the decay of representational reliability of working memory as trials elapse (**Figure 3D**). On  
204 each trial, the Bayes-optimal classifier performs the task by deducing  $v_{(t)}$  from  $s_{(t)}$  and  $c_{(t)}$  and translating  
205 it into a binary decision  $d_{(t)}$  with a degree of uncertainty  $u_{(t)}$  (**Figure 3E**; see Methods);  $v_{(t)}$  is the  
206 probability that  $s_{(t)}$  will be greater than  $c_{(t)}$  ( $p(s_{(t)} > c_{(t)})$ );  $d_{(t)}$  is ‘large’ or ‘small’ if  $v_{(t)}$  is greater or  
207 smaller than 0.5, respectively;  $u_{(t)}$  is the probability that  $d_{(t)}$  will be incorrect (*Sanders et al., 2016*)  
208 ( $p(s_{(t)} < c_{(t)} | d_{(t)} = \text{‘large’})$  or  $p(s_{(t)} > c_{(t)} | d_{(t)} = \text{‘small’})$ ). Because all of the decision outcomes are  
209 deduced from  $s_{(t)}$  and  $c_{(t)}$ , a bivariate decision space of  $p(Z | m_{(t)})$  and  $p(Z | \mathbb{r}_{(t)})$  effectively captures both of  
210 the present decision outcomes and the attraction of  $c$  toward the past stimuli (**Figure 3F**). In summary, we  
211 propose that, as the ring size ( $Z$ ) varies over trials, the classifier (i) infers  $s$  on a current trial and the  
212 median values of the ring sizes encountered over ‘past’ trials as  $c$ , (ii) deduces the values of  $v$  from  $s$  and  $c$ ,  
213 and (iii) makes decisions ( $d$ ) with varying degrees of uncertainty ( $u$ ).

214 To verify our proposal, we created eighteen Bayes-optimal classifiers by fitting the model to  
215 eighteen human observers’ decisions respectively (**Figure 3-figure supplement 1**; see Methods). We  
216 simulated decisions and decision uncertainties made of the Bayes-optimal classifiers on the stimuli  
217 sequence encountered by their human partners, and examined the correspondences between the human  
218 and Bayes-optimal classifiers regarding each of the aforementioned three intuitions.  
219

## 220 **Intuition I: criterion relates past stimuli to current decisions**

221 The model makes testable predictions of how past stimuli relate to current decisions through multiple  
222 regression analysis (see Methods). As exemplified in the apple-sorting scenario, whereby different farmers  
223 had formed different  $c$  according to recent experiences of apples (**Figure 1A**), the model predicts that  $c$  is  
224 more attracted to more recent measurements (**Figure 3D,E**). This entails that current decisions are more  
225 strongly repelled from more recent stimuli (**Figure 4A**), and that decision uncertainties are high when  
226 current decisions are congruent with recent stimuli (**Figure 4B**), as in the case of ‘O by F’, whereby  
227 decisions are repelled from ‘large’ and their uncertainties are high on ‘large’ decisions (**Figure 1D**). By  
228 contrast, our model predicts negligible effects of past decisions on current decisions and uncertainties.

229 Observers’ decisions and RTs confirmed the model predictions when they are regressed onto past  
230 stimuli, as well as current stimuli and past decisions (**Figure 4C,D**). In addition, based on previous studies  
231 suggesting that the dorsal anterior cingulate cortex (dACC) is a locus of decision uncertainty (*Behrens et al.,*  
232 *2007; Shenhav et al., 2014; Sheth et al., 2012*), we also examined whether the blood-oxygen-level-dependent  
233 (BOLD) responses in the dACC are consistent with the model predictions of  $u_{(t)}$ . We found that the dACC  
234 activity at 5.5 s from stimulus onset (dACC<sub>u5</sub>) was not just correlated with  $u_{(t)}$  ( $\beta = 0.10, P = 2.4 \times 10^{-7}$ )  
235 (**Figure 4F; Figure 4-figure supplement 1, 2**) but also significantly regressed onto the congruencies between  
236 past stimuli and decisions as predicted by the model (**Figure 4E**).

237 The variances explained by the constant- $c$  model, whereby  $c$  was fixed at a constant and thus  
238 effects of past stimuli were neglected, increased by 29%, 34% and 49% for human decisions, RT, and dACC  
239 activity, respectively, compared to the  $c$ -inference model ( $\frac{\text{Var}_{\text{inferred}} - \text{Var}_{\text{constant}}}{\text{Var}_{\text{constant}}} \times 100$ ; **Figure 4-figure**  
240 **supplement 3A-F**; see Methods). Furthermore, the uncertainty estimates of the constant- $c$  model were no  
241 longer correlated with dACC<sub>u5</sub> ( $P_{\text{FDR}} > 0.05$ ) (**Figure 4F; Figure 4-figure supplement 3G**), which indicates  
242 that the inferred  $c$  has an essential contribution to the cortical representation of decision uncertainty.

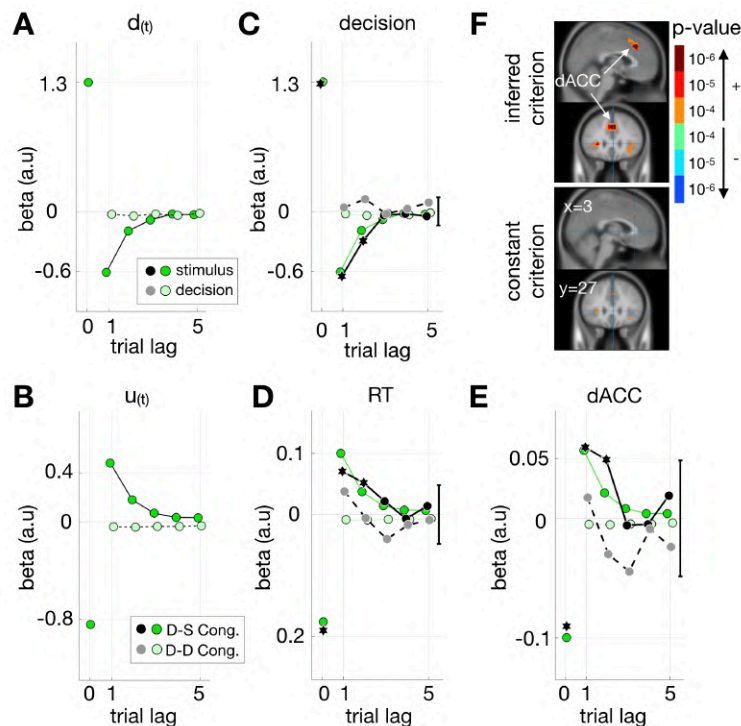

243  
244 **Figure 4.** Criterion relates past stimuli to current decisions. (A, B) Model prediction for impacts of past stimuli and decisions on  
245 present decisions. (A) Model predictions of multiple logistic regressions of current decisions onto stimuli and past decisions. (B)  
246 Model predictions of multiple linear regressions of current decision uncertainties onto the congruence of a current decision with  
247 stimuli and past decisions. (C) Multiple logistic regressions of observed current decisions onto stimuli and past decisions. (D, E)  
248 Multiple linear regressions of RT and dACC activity onto the congruence of current decisions with stimuli and past decisions. (A-E)  
249 Black and green symbols represent the coefficients for observed and simulated data, respectively. (C-E) Observed coefficients that  
250 are significantly deviated from zero (C: pairwise t-test,  $P < 0.05$ ; D, E: GLMM,  $P < 0.05$ ) are indicated by black hexagons. For clarity,  
251 only the average of 95% confidence intervals (CIs) for the mean of observed coefficients (C: bootstrap CI; D, E: GLMM CI) are indicated  
252 by vertical black bars. None of the observed coefficients significantly deviates from the simulated coefficients (C: pairwise t-test,  $P >$   
253  $0.05$ ; (D, E) the simulated mean was located within GLMM 95% CI of the observed mean). (F) Statistical significances (p-values) of  
254 linear regression (GLMM) of dACC activity 5.5 s after stimulus onset onto decision uncertainty estimated by the inferred-criterion  
255 model (top) or by the constant-criterion model (bottom). The signs of regression coefficients are indicated by '+' and '-'. dACC,  
256 dorsal anterior cingulate cortex. See also *Figure 4-figure supplement 1, 2, 3, 4, 5.*

257 **Figure 4-figure supplement 1:** Specifications of the ROIs in which activity was correlated with decision uncertainty.

258 **Figure 4-figure supplement 2:** Univariate BOLD signals correlated with decision uncertainty.

259 **Figure 4-figure supplement 3:** Limitations of the constant-criterion model

260 **Figure 4-figure supplement 4:** Verifying the model predictions of the impacts of past stimuli on current decisions with different sets of  
261 stimuli, feedback types, and inter-trial-interval lengths.

262 **Figure 4-figure supplement 5:** Verifying the model predictions of the impacts of past stimuli on current decision RTs with different  
263 sets of stimuli, feedback types, and inter-trial-interval lengths.

264  
265

## 266 **Intuition II: dissecting stimulus and criterion contributions to classification**

267 Our model decomposes the trial-to-trial variability in decision and uncertainty into that originating from  $s$   
268 and that from  $c$ . Speaking in terms of the apple-sorting scenario, our model specifies why and how much a  
269 current decision is ascribed to the farm from which an apple came (*Figure 1B*) and to the farm from which a  
270 farmer came (*Figure 1C*).

271 The model's dissection of the  $s$  and  $c$  effects is illustrated in the bivariate decision space (*Figure*  
272 *5A*). The probability of making the 'large' decision ( $p_{L(t)}$ ), which corresponds to the truncated bivariate  
273 distribution that satisfies  $s_{(t)} > c_{(t)}$ , is greater for 'L' rings than for 'S' rings, but decreases as  $c_{(t)}$  increases,  
274 regardless of ring size (*Figure 5A,B*). The decision uncertainty ( $u_{(t)}$ ) of 'large' decisions, which corresponds  
275 to how close the mean of the truncated bivariate distribution that satisfies  $s_{(t)} > c_{(t)}$  is to the equality of  
276  $s_{(t)}$  and  $c_{(t)}$ , is higher for 'S' rings than for 'L' rings, but increases as  $c_{(t)}$  increases, regardless of ring size  
277 (*Figure 5A,C*). For 'small' decisions, the  $s$  and  $c$  effects on decision uncertainty can be described in similar  
278 ways, based on the truncated bivariate distributions that satisfy  $s_{(t)} < c_{(t)}$  (*Figure 5A,C*).

279 The human data matched the Bayes-optimal classifier's  $d_{(t)}$  and  $u_{(t)}$  in both qualitative and  
280 quantitative aspects. Qualitatively, the decision fractions were concurrently regressed onto the current

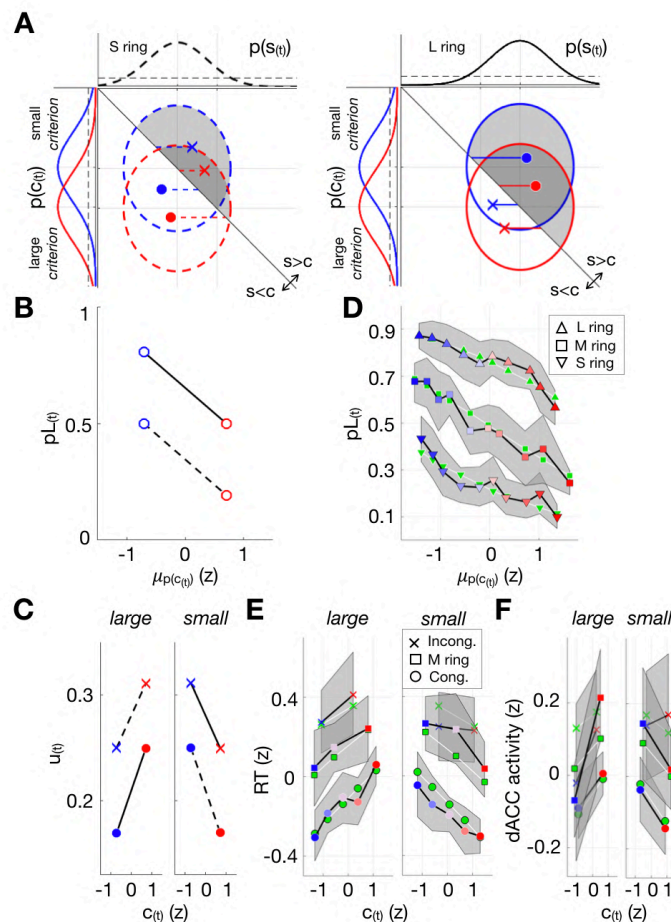

281  
282  
283  
284  
285  
286  
287  
288  
289  
290  
291  
292  
293  
294  
295  
296  
297  
298  
299  
300

**Figure 5.** Dissecting stimulus and criterion contributions to classification. **(A)** Bivariate distributions of  $s_{(t)}$  and  $c_{(t)}$  for different combinations of ring size and criterion size. Ellipsoids demarcate the distribution contours defined at 20% of the peak, as indicated by the dashed gray lines traversing the univariate distributions. Bivariate distributions shift horizontally depending on ring size, leftward for S ring (dashed) and rightward for L ring (solid), or vertically depending on criterion size, downward for large criterion (red) and upward for small criterion (blue), which allow us to dissect and predict the respective contributions of  $s_{(t)}$  and  $c_{(t)}$  to decision fraction and uncertainty. Fractions of trials with ‘large’ decisions ( $pL_{(t)}$ ) are indicated by the shaded areas. Decision uncertainty ( $u_{(t)}$ ) is represented by how close the means of the truncated bivariate distributions conditional on decisions ( $s_{(t)} > c_{(t)}$  on ‘large’ decision and  $s_{(t)} < c_{(t)}$  on ‘small’ decision) are to the identity ( $s_{(t)} = c_{(t)}$ ) line, as indicated by the lengths of horizontal red and blue lines. The ‘o’ and ‘x’ symbols represent trials on which decisions are congruent and incongruent with stimuli, respectively (see *Figure 3E* for the definition of congruence). **(B, C)**  $pL_{(t)}$  **(B)** and  $u_{(t)}$  **(C)** plotted against mean criteria for the four bivariate distributions shown in **(A)**. Colors and line styles match those in **(A)**. **(D-F)**  $pL_{(t)}$  **(D)**, RTs **(E)**, and dACC activity **(F)** are plotted against the means of inferred criteria for each stimulus **(D)** or decision-stimulus congruency **(E, F)** conditions (blue or red symbols), juxtaposed with model simulation results (green symbols). Trials were sorted and binned by  $c_{(t)}$ , as indicated by the symbols’ color and hue that vary in a scheme similar to that in **(A-C)**. Shaded areas represent 95% bootstrap confidence intervals of data means. None of the observed data significantly deviated from the model predictions (pairwise t-test,  $P > 0.05$ ). See also *Figure 5-figure supplement 1*.

**Figure 5-figure supplement 1:** Verifying the model’s ability to account for respective contributions of stimulus and criterion with different sets of stimuli, feedback types, and inter-trial-interval lengths.

301  
302  
303  
304  
305  
306  
307

stimulus and the inferred criterion (to be exact, the expected value of model  $c$  estimates  $\mu_{p(c_{(t)})}$ ; see Methods for its definition and derivation) as the model predicts (multiple logistic regression,  $\beta_{Z_{(t)}} = 1.07$  ( $P = 1.8 \times 10^{-35}$ ),  $\beta_{\mu_{p(c_{(t)})}} = -0.59$  ( $P = 2.3 \times 10^{-20}$ ); *Figure 5D*). Likewise, the RTs and dACC responses were, when decisions were controlled, both regressed onto the current stimuli and the inferred criterion as the model predicts (multiple regression, RT:  $\beta_{Z_{(t)}} = -0.19$  ( $P = 6.9 \times 10^{-15}$ ),  $\beta_{\mu_{p(c_{(t)})}} = 0.12$  ( $P = 2.5 \times 10^{-5}$ ), for ‘large’ decision;  $\beta_{Z_{(t)}} = 0.20$  ( $P = 3.5 \times 10^{-16}$ ),  $\beta_{\mu_{p(c_{(t)})}} = -0.081$  ( $P = 9.4 \times 10^{-4}$ ), for ‘small’ decision; dACC:  $\beta_{Z_{(t)}} = -0.055$  ( $P = 0.053$ ),  $\beta_{\mu_{p(c_{(t)})}} = 0.084$  ( $P = 5.7 \times 10^{-4}$ ),



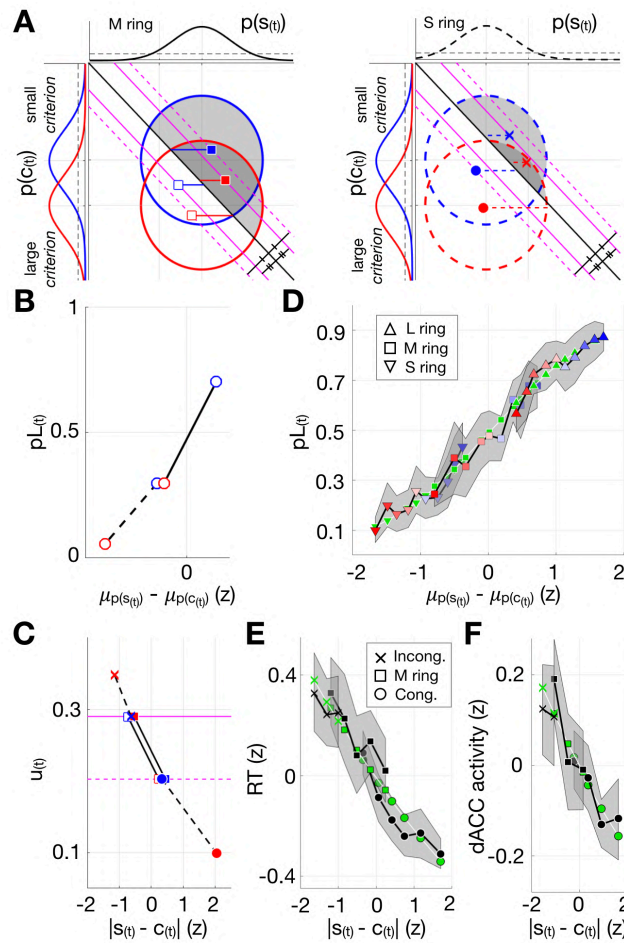

**Figure 6.** Relativity of classification. (A) Bivariate distributions of  $s_{(t)}$  and  $c_{(t)}$  for different combinations of ring size and criterion size. Formats, symbols, and lines are identical to those in Figure 5A, unless stated otherwise. Symbols falling on the same diagonal lines represent metameric decisions. Symbols falling on the diagonal lines of the same style (either solid or dashed), which are equivalent to each other in distance from the identity line, represent decisions with the same degree of decision uncertainty. The stimulus-criterion congruence is indicated by markers of 'o' (congruent), 'x' (incongruent), and '□' (M ring). (B) Fractions of 'large' decisions ( $pL_{(t)}$ ) plotted against the difference between the mean stimulus and criterion estimates. Colors and line styles match those in (A). (C) Decision uncertainty estimates plotted against the absolute difference between the stimulus and criterion estimates. Symbols and colors match those in (A). Dashed and solid purple lines in (A) are replotted here to further clarify the relationship between (A) and (C). (D) Observed  $pL_{(t)}$  are plotted against the binned difference between the mean stimulus and criterion estimates for each stimulus condition. The color spectrum from blue to red represents the increasing size of criterion estimates within a given condition. (E, F) Observed RTs (E) and dACC activity (F) plotted against the binned absolute difference between the stimulus and criterion estimates for each stimulus-congruence condition. (D-F) Observed data juxtaposed with model simulation results (green symbols). Shaded areas, 95% bootstrap confidence intervals of mean of data. None of the observed data significantly deviated from the model predictions (pairwise t-test,  $P > 0.05$ ). (Figure 6-figure supplement 1 specifies whether each of the observed pLs, RT and dACC activity between a bin pairs are indistinguishable or distinguishable). See also Figure 6-figure supplement 1, 2.

**Figure 6-figure supplement 1:** Definitions and predictions of decision-probability (pL) metamers and anti-metamers by the criterion-inference model.

**Figure 6-figure supplement 2:** Verifying the model's ability to account for the relativity of classification with different sets of stimuli, feedback types, and inter-trial-interval lengths.

for 'large' decision;  $\beta_{z(t)} = 0.11$  ( $P = 5.8 \times 10^{-5}$ ),  $\beta_{\mu_{p(c(t))}} = -0.059$  ( $P = 0.020$ ), for 'small' decision; (Figure 5E,F). Quantitatively, the Bayesian simulations fell within the 95% confidence intervals defined at all data bins inspected (Figure 5D-F).

### Intuition III: relativity of classification

Our model explains the relativity of classification at both computational and algorithmic levels (Marr and Poggio, 1976). At the computational level, what to be computed in the classification task is the inequality between  $s$  and  $c$ . This inequality computation, at the algorithmic level, is accomplished by forming a probabilistic representation of the difference between  $s_{(t)}$  and  $c_{(t)}$ , which is the decision variable,  $v_{(t)}$ . As

339 inuited in the apple-sorting scenario, trials are identical in  $v_{(t)}$  as long as they are matched in relative  
340 difference between  $s_{(t)}$  and  $c_{(t)}$ , and increasingly differ as the relative difference increases. In the bivariate  
341 decision space (*Figure 6A*), this means that decisions are (i) indiscernible as long as the expected values of  
342  $s_{(t)}$  and  $c_{(t)}$  fall on any single lines parallel to the equality line and (ii) discernible only to the extent to which  
343 the joint coordinates of  $s_{(t)}$  and  $c_{(t)}$  are distant from one another along the dimension perpendicular to the  
344 equality. Consequentially, the model predicts that the decision fraction and uncertainty vary only as single,  
345 monotonic functions of the signed (*Figure 6B*) and unsigned (*Figure 6C*) differences between  $s_{(t)}$  and  $c_{(t)}$ ,  
346 respectively.

347 When trials were sorted by the differences between  $s_{(t)}$  and  $c_{(t)}$ , human pLs, RTs, and dACC  
348 responses all constituted single, seamless psychometric, chronometric, and neurometric curves,  
349 respectively, which indicates that what governs classification is ‘s relative to c’ (*Figure 6D–F*). As  
350 consequences, pLs, RTs, and dACC responses became ‘metameric’ (significantly indiscernible) between the  
351 trials in which a physical difference between stimuli was compensated by a counteracting difference in  $c_{(t)}$ ,  
352 or ‘anti-metameric’ (significantly discernible) between the trials in which a physical sameness between  
353 stimuli was accompanied by a substantial difference in  $c_{(t)}$  (*Figure 6-figure supplement 1*), which supports  
354 the model’s prediction of metameric classifications. The model’s simulations fell within the 95% confidence  
355 intervals defined at all data bins inspected (*Figure 6D–F*).  
356

## 357 **The immunity of criterion inference to changes in participants, stimulus** 358 **range, feedback type, and inter-trial interval**

359 Note that some of specific conditions in the main experiment – such as the absence of trial-to-trial  
360 feedback, the limited number of ring sizes, and the long inter-trial interval – had to be adopted for the  
361 concurrent collections of behavioral and fMRI data. To check the immunity of the criterion-inference model  
362 to changes in such conditions, we subjected the model to further data sets that were collected outside the  
363 MRI scanner (with the purposes different from those of the current work) from different populations of  
364 observers with diverse variations in experimental conditions (*Choe et al., 2014, 2016; Lee et al., 2016*). These  
365 variations included: (1) different population of observers (the auxiliary data sets (AD) #1,2,3) (2) presence of  
366 trial-to-trial feedback (instead of run-to-run feedback; AD#2,3); (3) presentation of larger numbers and  
367 wide ranges of ring sizes (instead of only 3 threshold-level ring sizes; AD#2,3); (4) separation of trials with  
368 shorter inter-trial intervals (instead of the long interval of 13.2 s; AD#2,3) (see *Figure 4-figure supplement 4A*  
369 for details). Regardless of these variations, a total of 53 new observers exhibited all the key behavioral  
370 signatures that are predicted by the model and were observed in the main fMRI experiment: the impacts  
371 of past stimuli on current decision and uncertainty (*Figure 4-figure supplement 4,5*); respective  
372 contributions of stimulus and criterion (*Figure 5-figure supplement 1*); relativity of classification (*Figure 6-*  
373 *figure supplement 2*). When fit to the new data sets, the criterion-inference model readily captured the  
374 actual classification behaviors of people and predominated over the constant-criterion model in data  
375 accountability (*Figure 4-figure supplement 4D,5C*). These results support the generalizability of the  
376 criterion-inference model by suggesting that ‘criterion inference’ is an essential component of perceptual  
377 classification.  
378

## 379 **Causality between $c$ , $s$ , and $v$ in brain activity**

380 So far, we have validated the model by verifying its predictions for  $d$  and  $u$  in the behavioral data and dACC  
381 activity. Next, we set out to verify the model’s predictions for its core latent variables,  $c$ ,  $s$ , and  $v$ , from  
382 which  $d$  and  $u$  were deduced (*Figure 3E*), in the patterns of brain activity. These predictions are two fold:  
383 first, the model predicts the presence of brain signals that are correlated with the trial-to-trial states of  $c$ ,  $s$ ,  
384 and  $v$ ; second, if such brain signals exist, their trial-to-trial variabilities must satisfy their causal relations  
385 with all the remaining variables in the model, including the manipulated ( $Z$ ), latent ( $c$ ,  $s$ ,  $v$ ,  $u$ ) and observed  
386 ( $d$ ) variables. Verifying these predictions will lend strong support to our formalism by endowing its latent  
387 variables and their causal relations with neural presence.

388 For comprehensive search of candidate brain regions within which activity was correlated with  $c$ ,  $s$ ,  
389 and  $v$ , we opted to use multivoxel pattern analysis (MVPA) in conjunction with a searchlight technique,  
390 which is known to be highly sensitive to detect brain signals in local patterns of population fMRI responses  
391 (*Kriegeskorte et al., 2006*). Then, for each target variable (*Figure 7A*), we deduced a set of regressions from  
392 the causal relationships of the target variable with the other variables. For example, the decoded  $y_c$ , by

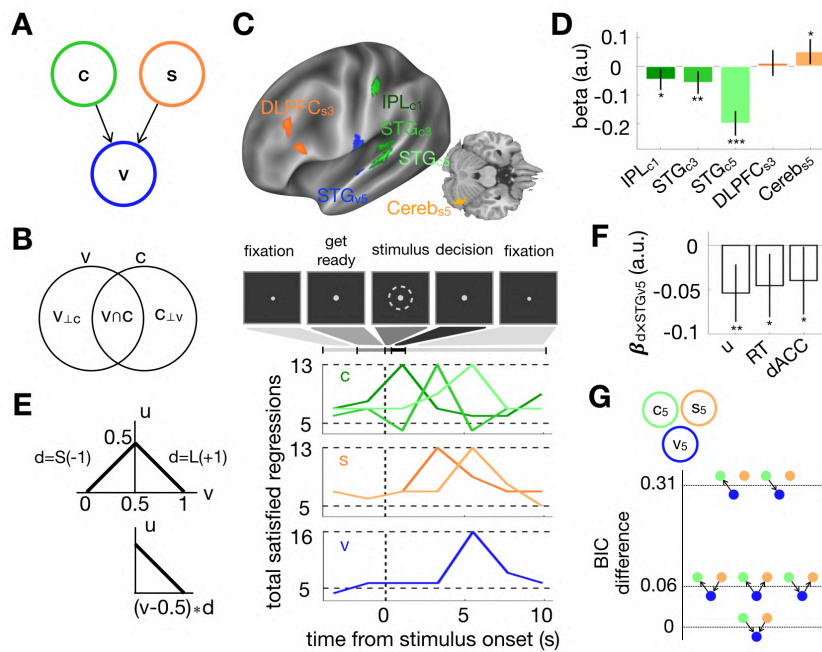

393  
394  
395  
396  
397  
398  
399  
400  
401  
402  
403  
404  
405  
406  
407  
408  
409  
410  
411  
412  
413  
414  
415  
416  
417  
418  
419  
420  
421  
422  
423  
424  
425  
426  
427  
428  
429  
430  
431  
432  
433  
434

**Figure 7.** Causality in brain activity. (A) Graphical representation of the causal relationships between  $c$ ,  $s$ , and  $v$ . (B) Venn-diagram representation of the structure of variances between  $c$  and  $v$ :  $v \cap c$ , shared variance;  $v_{\perp c}$  and  $c_{\perp v}$ , unexplained variances of  $c$  and  $v$  by each other. (C) Brain signals of  $c$ ,  $s$ , and  $v$  that satisfied all the regressions deduced from the causal structure of variables in the model (Figure 7-figure supplement 1 specifies all the regressions). Top, six brain loci for  $c$  (green),  $s$  (orange), and  $v$  (blue) signals. Bottom, the numbers of the regressions satisfied are plotted as a function of time relative to stimulus onset for the  $c$ ,  $s$ , and  $v$  signals (Figure 7-figure supplement 2, 3 specifies the ROIs correlated with each latent variable). (D) Coefficients of multiple regressions of the  $v$  signals onto the  $c$  and  $s$  signals. (E) Functional representation of the causal relationships between  $v$ ,  $d$ , and  $u$ . Top,  $v$  and  $u$  are associated but uncorrelated. Bottom,  $v$  and  $u$  become correlated when controlled for  $d$ . (F) Coefficients of the ‘decision  $\times$   $v$  signal’ interactive term in the regression of the model estimate of  $u$ , observed RTs, and brain signal of  $u$ , respectively. (G) Bayesian networks and their relative BIC scores that explain the causal relation between the brain signals of  $STG_{c5}$ ,  $Cereb_{s5}$ , and  $STG_{v5}$ . For other candidate structures, see Figure 7-figure supplement 4. \* $P < 0.05$ , \*\* $P < 0.01$ , \*\*\* $P < 0.001$ . Error bars represent 95% GLMM confidence intervals.  $IPL_{c1}$ :  $c$  decoded from inferior parietal lobe at 1.1 s;  $STG_{c3}$  (or  $s$ ):  $c$  decoded from superior temporal gyrus at 3.3 s (or 5.5 s);  $DLPFC_{s3}$ :  $s$  decoded from dorsal lateral prefrontal cortex at 3.3 s;  $Cereb_{s5}$ :  $s$  decoded from cerebellum at 5.5 s;  $STG_{v5}$ :  $v$  decoded from superior temporal gyrus at 5.5 s. The time represents time elapse from stimulus onset. See also Figure 7-figure supplement 1, 2, 3, 4.

**Figure 7-figure supplement 1:** Deduction of the regressions for  $c_{(t)}$ ,  $s_{(t)}$ , and  $v_{(t)}$  from the causal structure of manipulated (stimuli), observed (decisions), and latent model variables ( $c$ ,  $s$ ,  $v$ ,  $u$ , and  $d$ ).

**Figure 7-figure supplement 2:** Maps of the numbers of regression tests satisfied for the latent variables in the model ( $s$ ,  $c$ , and  $v$ ).

**Figure 7-figure supplement 3:** Specifications of the ROIs in which activity was informative of the latent variables in the model ( $s$ ,  $c$ , and  $v$ ).

**Figure 7-figure supplement 4:** Correspondence between the causal graph of the latent variables that is prescribed *a priori* by the model ( $c \rightarrow v \leftarrow s$ ) and the *maximum likelihood* causal graph that is inferred from the brain signals representing those variables.

definition ( $v \sim s - c$ ), must be regressed positively on itself ( $y_c \sim +c$ ) and negatively on  $v$  ( $y_c \sim -v$ ), but must not be regressed on  $v$  when  $v$  is orthogonalized against  $c$  ( $y_c \sim -v_{\perp c}$ ) (Figure 7B). In this way, additional regressions were further deduced from the causal relationship of  $c$  with the remaining latent ( $s, u$ ), observable ( $d$ ), and manipulated ( $Z$ ) variables, resulting in 13 regressions for  $c$ . Likewise, we deduced 13 and 16 regressions for  $s$  and  $v$ , respectively (Figure 7-figure supplement 1). We then evaluated each candidate region by testing whether the decoded target variable satisfied those regressions. Six regions survived the test (Figure 7C; Figure 7-figure supplement 2, 3). The signal of  $c$  appeared in three different regions at different time points relative to stimulus onset, as follows: a region in the inferior parietal lobe at 1.1 s ( $IPL_{c1}$ ), followed by two regions in the superior temporal gyrus at 3.3 and 5.5 s ( $STG_{c3}$ ,  $STG_{c5}$ ). The signal of  $s$  appeared both in the dorsolateral prefrontal cortex at 3.3 s ( $DLPFC_{s3}$ ) and in the cerebellum at 5.5 s ( $Cereb_{s5}$ ). The signal of  $v$  appeared in the left superior temporal gyrus at 5.5 s ( $STG_{v5}$ ).

The interplays between brain signals also satisfied the causal structure defined by the model. First, the interplays between  $c$ ,  $s$ , and  $v$  signals were well captured by a multiple regression model,  $STG_{v5} \sim \beta_{s3} DLPFC_{s3} + \beta_{s5} Cereb_{s5} + \beta_{c1} IPL_{c1} + \beta_{c3} STG_{c3} + \beta_{c5} STG_{c5}$ , which was derived from the ‘common-effect’ structure of causal relationships between the variables ( $c \rightarrow v \leftarrow s$ ) (Figure 7A). The regression coefficients matched the model predictions in sign for all of the five brain signals and were all significant except for  $DLPFC_{s3}$  ( $\beta_{s3} = 0.011, P = 0.55$ ;  $\beta_{s5} = 0.047, P = 0.013$ ;  $\beta_{c1} = -0.046, P = 0.0088$ ;  $\beta_{c3} = -0.056, P = 0.0037$ ;  $\beta_{c5} = -0.15, P = 1.9 \times 10^{-17}$ ; Figure 7D). Second, the decision-

435 dependent interplay between  $v$  and  $u$  signals was successfully captured by an interactive regression model,  
436  $dACC_{u5} \sim \beta_v STG_{v5} + \beta_d d + \beta_{d \times v} d \times STG_{v5}$ , which was derived from the ‘common-cause’ structure of causal  
437 relationships between the variables ( $d \leftarrow v \rightarrow u$ ) (Figure 7E). Importantly, the interactive regression  
438 on  $d \times STG_{v5}$  was significant for  $dACC_{u5}$  ( $\beta_{d \times v} = -0.040, P = 0.04$ ), as well as for RT ( $\beta_{d \times v} = -0.045, P =$   
439  $0.013$ ) and  $u_{(t)}$  ( $\beta_{d \times v} = -0.054, P = 0.0012$ ; Figure 7F). Finally, to complement the model-driven  
440 regression analyses performed above, we used a data-driven approach to calculate the Bayesian  
441 Information Criterion (BIC) for each of the possible causal structures between the brain signals of  $c$ ,  $s$ , and  
442  $v$  (Scutari, 2009) (see Methods; Figure 7-figure supplement 4). In line with the regression analyses, the  
443 causal structure of  $c \rightarrow v \leftarrow s$  emerged as one of the most probable causal structures (Figure 7G; Figure 7-  
444 figure supplement 4).

445  
446

## 447 Discussion

448 The present work gives  $c$  firm computational and representational presences in classification by specifying  
449 the generative model, which defines the origins of  $s$  inference and  $c$  inference, dissects their respective  
450 contributions to the trial-to-trial variability of classification, and accounts for how their interplay underlies  
451 the relativity of decision making. Such presences were further secured against diverse variations in task  
452 conditions such as different participants, stimulus range, feedback type, and inter-trial interval. Our work  
453 also give  $c$  a neural presence by uncovering the brain network within which the brain signal of  $c$  interacts  
454 with the brain signals of  $s$  and  $v$ , as the model prescribes.

455

## 456 Bayes-optimal criterion inference

457 Although the true  $c$  is the population median of quantities, without access to quantities that will be  
458 encountered in the future, people have to rely on the quantities experienced so far. Further, due to  
459 memory limitations (Gorgoraptis et al., 2011; Zokaei et al., 2015), these past quantities cannot be retrieved  
460 entirely or reliably. Our model claims that, under these constraints, the best possible way to access the true  
461  $c$  is to probabilistically integrate past observations by assigning them optimal weights based on their  
462 reliability.

463 In this sense, our model is Bayes-optimal, and our results imply that people performs our task with  
464 bounded rationality (Simon, 1955) by considering the limits of their own memory faculty. In this regard, the  
465 variability of the inferred  $c$  across trials should not be taken as suboptimal digressions from the true, fixed  
466  $c$ , but rather as the best possible guesses for the true  $c$ , which vary trial to trial because of the variability of  
467 retrieved past quantities. This may explain the seemingly suboptimal behavioral strategies used by animals  
468 in an olfactory classification task (Zariwala et al., 2013).

469

## 470 Breaking the monopoly of stimulus inference

471 In classification models without  $c$  inference (Gold and Shadlen, 2007; Green and Swets, 1966; Kepecs et al.,  
472 2008; Meyniel et al., 2015),  $s$  inference monopolizes the variability of  $v$  via a single causal chain ( $s \rightarrow v$ ;  
473 Figure 8A). The  $c$ -inference model creates another causal route to  $v$  by having the inferred  $c$  as another  
474 parent for  $v$  ( $c \rightarrow v$ ) and a child of past stimuli ( $Z \rightarrow c \rightarrow v$ ) (Figure 8B). This alternative route breaks the  
475 monopoly of  $s$  inference and brings fresh perspectives to several aspects of classification processes, which  
476 have not been adequately addressed by the models without  $c$  inference.

477 First,  $c$  inference plays the role of a ‘historian’ by letting past episodes partake in a present  
478 decision. Our model’s account for this role of  $c$  warns that one should not regress current decisions onto  
479 present stimuli without including past stimuli a co-regressor (Fründ et al., 2014).

480 Second,  $c$  claims a fair share of credit for the variability in classification, which has so far been  
481 monopolized by  $s$  in previous formalisms (Gold and Shadlen, 2007). In our work, the contributions of  $c$  to  
482 decision, RT and  $dACC$  activity were about a third of that of  $s$  (Figure 4-figure supplement 3).

483 Third,  $c$ , as a legitimate parent to  $v$  along with  $s$ , precisely defines the relativity and metamerism in  
484 classification with a rigor to predict when and to what extent decisions become indiscernible or discernible.

485 Finally, as a new species brings a native ecosystem a new configuration (Richardson and Rejmánek,  
486 2011),  $c$  reconfigures the old causal architecture of classification (Figure 8). This, by redefining  $s$ ,  $v$ , and  $u$ ,  
487 leads to better quantitative predictions for the variability in decision and RT, and detection of the brain  
488 signal of  $u$ , which was undetectable by the constant- $c$  model, in the  $dACC$ .

489

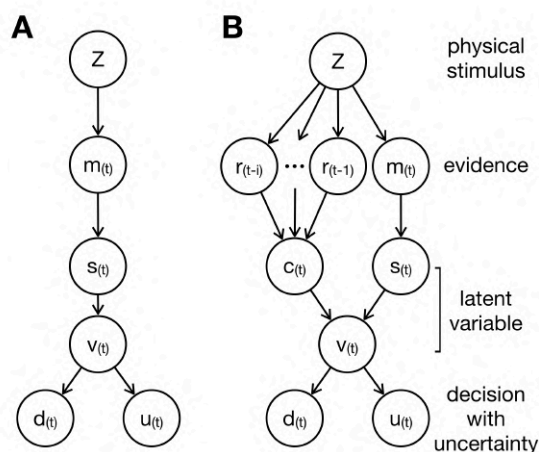

490  
491 **Figure 8.** Causal structures of variables without and with criterion inference. **(A)** Causal structure without  $c$  inference. The information  
492 originating from a current value of the stimulus variable ( $Z$ ) flows in  $v$  only via a single causal stream ( $Z \rightarrow m \rightarrow s \rightarrow v$ ). **(B)** Causal  
493 structure with  $c$  inference. The information originating from a current value of  $Z$  is joined by another originating from past values of  $Z$   
494 via the conduit of  $c$  inference ( $Z \rightarrow r \rightarrow c \rightarrow v$ ), creating the confluence of information streams of past experiences and current sense  
495 of external stimulus quantities. This information confluence due to criterion inference redefines  $v$  and thus distinguishes  $v$  and  $s$ . See  
496 also *Figure 8-figure supplement 1, 2*.

497 **Figure 8-figure supplement 1:** Specifications of the latent variables of the criterion-inference model.

498 **Figure 8-figure supplement 2:** The 'classification' with a generative model for 'categorization' cannot give a coherent account for the  
499 history effects of previous stimuli and decisions on current decisions

500  
501

## 502 Brain signals of inferred criterion

503 The brain signals of  $c$  appeared initially at the IPL and migrated towards the STG, where the  $v$  signal resides.  
504 We conjecture that working-memory representations of past stimuli are likely to be formed in the IPL and  
505 then are transferred to the STG, wherein they turned into  $c$  to partake in classification of current stimuli.  
506 This conjecture appears to be consistent with the literature in several aspects. Optical inactivation of the  
507 posterior parietal cortex (PPC) of rat – a region presumed to be a rat homologue of the primate IPL (*Goard*  
508 *et al., 2016; Hanks et al., 2015; Roitman and Shadlen, 2002*) – selectively diminished the influence of previous  
509 stimuli (history effects) but left the task performance on current stimuli intact (*Akrami et al., 2018*),  
510 indicating a critical role of the IPL in encoding previous stimulus information. In addition, perturbing the  
511 PPC after current stimulus onset failed to diminish history effects, suggesting that the information of  
512 previous stimuli is likely to be maintained in some brain regions other than the PPC (*Hwang et al., 2017*). On  
513 the other hand, the  $c$  signal at the STG is consistent with its suggested roles in coordinating the spatial  
514 reference frame (*Karnath, 2001; Karnath et al., 2001; Karnath et al., 2002*), in that  $c$  in our task works as a  
515 spatial reference against which  $s$  is compared. The functional flow from the IPL to the STG is further  
516 corroborated by their anatomical connection (*Seltzer and Pandya, 1994*). In line with these findings, our  
517 data showed that  $c$  decoded in IPL temporally preceded current stimulus onset whereas  $c$  in STG occurred  
518 at or following current stimulus onset.

519 Indirect neural signatures of  $c$  have been recently reported (*Crapse et al., 2018; Li et al., 2009; Luo*  
520 *and Maunsell, 2018*), but the neural correlate of  $c$ , per se, has been explored by one previous study, which  
521 reported the inferior temporal pole region as the locus of  $c$  (*White et al., 2012*). Unfortunately, we could  
522 not confirm this report, because this region was not fully imaged for all participants (see Methods).  
523 Nonetheless, their failure of finding neural correlates of  $c$  in IPL or STG could be due to the fact that the  
524 effect of past stimuli was not considered in defining  $c$ . This conjecture is grounded in the contrast between  
525 the constant- $c$  model's failure to detect the  $u$  signal in the dACC and our  $c$  inference model's redemption of  
526 the  $u$  signal in dACC.

527

## 528 Brain signals of inferred stimulus and decision variable

529 The representational inconsistency between  $s$  and  $c$  is problematic for dissecting neural signals of  $s$  and  $v$ ,  
530 because  $s$ , a single parent of  $v$ , is highly correlated with  $v$  in the constant- $c$  model (*Figure 8A, Figure 8-*  
531 *figure supplement 1A,B*), which could have led to arbitrary or ambiguous interpretations of given neural  
532 activities either as  $s$  or as  $v$ , depending on research contexts or objectives (*Baumann et al., 2015; Curtis and*  
533 *Lee, 2010; Haller et al., 2018; Heekeren et al., 2006; Kim and Shadlen, 1999*). By contrast, our model, in

534 which  $s$  is only regressed onto a current stimulus whereas  $v$  both onto a current and past stimuli (Figure 8B,  
535 Figure 8-figure supplement 1B), could identify distinct brain signals of  $s$  and  $v$ .

536 The presence of  $s$  signal in the DLPFC is compatible with its suggested roles in maintaining current  
537 sensory information during decision-making (Curtis and Lee, 2010; Haller et al., 2018). Our findings also  
538 suggest that the cerebellum encodes task-relevant stimulus features during classification, in line with  
539 previous studies indicating the involvement of the cerebellum in sensory perception (Baumann et al., 2015;  
540 Gao et al., 1996). Note that the latent variable  $s$  should not be confused with physical stimulus size  $Z$ , which  
541 is a variable manipulated by experimenters (Figure 3; Figure 8). Accordingly, the  $s$  signals found in the  
542 DLPFC and cerebellum did not represent external stimuli per se but the inferred estimates of external  
543 stimuli that partake in classification (Figure 8-figure supplement 1C). In contrast, the  $s$  signals in the  
544 retinotopic visual areas were much weaker than those in the DLPFC and cerebellum (Figure 7-figure  
545 supplement 2B). To further explore the presence of  $s$  signals in the early visual cortex, we revisited one of  
546 our previous imaging studies (Choe et al., 2014), where high-resolution fMRI responses were acquired in V1  
547 while observers performed the same task as in the current study, and examined the V1 population activity  
548 with a fine-retinotopy-based population decoding analysis. Unlike the DLPFC and cerebellum, where the  
549 brain signals were significantly regressed onto both external stimuli and decisions made by observers as  
550 expected from the causal chain through  $s$  ( $Z \rightarrow m \rightarrow s \rightarrow v \rightarrow d$ ; Figure 8-figure supplement 1D), the V1  
551 activity was regressed only onto external stimuli but not onto decisions (Figure 8-figure supplement 1E).  
552 This implies, as concluded previously (Choe et al., 2014; Jasper et al., 2019; Lee et al., 2007; Nienborg and  
553 Cumming, 2009), that the V1 population activity represents physical stimuli ( $Z$ ) robustly but its trial-to-trial  
554 variability does not seem to be causally involved in determining the trial-to-trial variability in choice, which  
555 contradicts the property of  $s$  in our model.

556 Given the location of  $v$  at the confluence of the two upstream ( $Z \rightarrow s \rightarrow v$ ;  $Z \rightarrow c \rightarrow v$ ) and two  
557 downstream flows of information ( $v \rightarrow d$ ;  $v \rightarrow u$ ), the  $v$  signal in the STG should be considered importantly  
558 because its variability was consistent with the nuanced interplays between all the four streams. That said, if  
559 a neural correlate of  $v$  was to be identified, it should be interpreted with caution because it might simply  
560 represent an ancestor or offspring of  $v$  rather than  $v$  itself (Pearl et al., 2016). This might explain a recent  
561 report (Katz et al., 2016) of no behavioral consequences of lesioning of an area that has been presumed to  
562 be a locus of  $v$  for several decades.

563

## 564 Classification versus categorization

565 The difference between classification and categorization tasks has rarely been appreciated by previous  
566 studies, presumably because the two tasks appear similar on a surface level in that they both require  
567 translating continuous variables into discrete variables. As footnoted in Introduction, however,  
568 classification (e.g., “Is your cat big?”) should not be confused with categorization (“Is that a cat or a dog?”) since they fundamentally differ in what to be computed (Jacob, 2004). In terms of our apple-sorting scenario, categorization would be to answer the question of ‘which farm is this apple from?’. Specifically, while classification requires judging the inequality between an instance quantity (‘size of your cat’) and a criterion (‘typical size of cats’), categorization requires judging which category (‘cat’ or ‘dog’) an instance (‘that particular animal’) belongs to (Green and Swets, 1966). In this regard, inference of  $c$  is necessary for classification but not for categorization whereas a generative model of categories (i.e., how instances are generated from respective categories) is necessary for categorization but not for classification. Nevertheless, previous computational studies on categorization (Norton et al., 2017; Qamar et al., 2013) explained human categorization behavior based on generative models of categories, which is necessary for categorization, but also described the model behavior using the concept of criterion, which is unnecessary for categorization. This prompted us to consider the possibility that people could have performed our classification task using the model of categorization despite the suboptimality of the strategy (Ma, 2012). However, this possibility was negated because the categorization model could not provide a coherent account for the history effects in our classification task (Figure 8-figure supplement 2), which supports that  $c$  inference is crucial for performing our task.

584

## 585 History effects in classification via dynamic criterion update

586 Stimulus history effects in perception (‘history effects’ in short) refer to various phenomena in which past  
587 stimuli affect perception of current stimuli, and have recently received considerable attention. Our  $c$ -  
588 inference model offers a normative account for the history effect in a classification task:  $c$ , which is a  
589 Bayes-optimal probabilistic integration of working-memory representations of past stimuli, is attracted

590 toward past stimuli, and this leads to decisions that are repulsed from recent stimuli. This history effect,  
591 and our account for it, is distinct from those in previous studies as follows.

592 First, the attractive history effects reported in estimation tasks, whereby perceptual estimates of  
593 current stimuli tend to be attracted toward past stimuli (*Bliss, Sun, & D'Esposito, 2017; Cicchini, Anobile, and*  
594 *Burr, 2014; Fritsche, Mostert, and de Lange, 2017; Fischer and Whitney, 2014; Liberman, Fischer, and Whitney,*  
595 *2014*), may appear conflicting with the repulsive history effect found in the current paper. However, these  
596 seemingly conflicting results might be grounded in a common process, whereby a belief over stimulus  
597 values is dynamically updated toward recent stimuli but manifest its impact in the opposite directions due  
598 to task difference. In estimation tasks, prior expectations (e.g., 'what angle of orientation is expected to  
599 appear on an upcoming trial?') will tend to attract the posterior belief of a current stimulus toward past  
600 stimuli, resulting in attractive history effects. In classification tasks,  $c$  (e.g., 'what angle of orientation is  
601 likely to be an appropriate criterion for upcoming classification?'), though being also attracted to past  
602 stimuli, will lead to decisions that are repulsed from recent stimuli because decisions are made from  
603 relative comparison of a current stimulus against  $c$ . Checking this possibility empirically (e.g.,  
604 demonstrating that stimulus size estimation and classification are attracted to and repulsed from,  
605 respectively, recent stimuli in a single experiment) will be an interesting extension of the current work and  
606 will bridge 'estimation' and 'classification' tasks via a common process of dynamic stimulus prior update.

607 Second, Glaze and his colleagues (*Glaze et al., 2015; Glaze et al., 2018*) have recently proposed a  
608 normative formalism for history effects in perceptual choice. Their formalism is relevant for categorization  
609 while ours for classification. As mentioned earlier, what needs to be computed differs between the two  
610 tasks, and this difference leads to the difference in what information needs to be gleaned from past trials.  
611 The observers in Glaze et al. need to update 'category priors' – a pair of prior probabilities of task-relevant  
612 categories (e.g., the probabilities of male and female in a gender categorization task; (*Glaze et al., 2015;*  
613 *Gold and Shadlen, 2007; Green and Swets, 1966*)) whereas those in our experiment need to update  $c$ , which  
614 is a median value of the single distribution of task-relevant stimulus features (e.g., a typical height of  
615 people in a height classification task; *Petzschner et al., 2015*).

616 Third, unlike many previous studies on history effects (*Burr and Cicchini, 2014; Dyjas et al., 2012;*  
617 *Fritsche et al., 2017; Glaze et al., 2015; Raviv et al., 2012; Treisman and Williams, 1984*), our account does not  
618 require any premises regarding environmental volatility at all. Our formalism for  $c$  inference is grounded in  
619 the premise that working memory precision decays as trials elapse (*Bays, 2015; Gorgoraptis et al., 2011; Ma*  
620 *et al., 2014; Zokaei et al., 2015*), which makes  $c$  dynamically attracted toward recent stimuli. For this reason,  
621 although there was no autocorrelation between stimuli (thus, no information regarding environmental  
622 volatility), history effects were still observed in our experiment via dynamic criterion update. For that  
623 matter, our normative formalism of probabilistic inference of  $c$  based on precision decay of working  
624 memory should also be distinguished from other accounts in which working memory decay was only  
625 formalized in descriptive or mechanistic manners (*Norton et al., 2017; Treisman and Williams, 1984;*  
626 *Wickelgren and Norman, 1966*).

627

## 628 **Future extensions of the formalism for criterion inference**

629 We think that internal criterion plays crucial roles not just in perceptual classification but also in other  
630 important cognitive phenomena such as 'perceptual disability (*Lau, 2007*)', 'metacognition of decision  
631 confidence (*Kepecs et al., 2008; Sanders et al., 2016*)', and 'attentional modulation (*Luo and Maunsell, 2018*)'.  
632 Previous studies have so far been treating internal criterion as a constant in accounting for such  
633 phenomena. To check whether the 'inferred criterion' can offer better accounts for behavior and neural  
634 activity in such phenomena will be important steps toward establishing the generalizability of our new  
635 formalism proposed here. Another important direction of extending our formalism of criterion inference  
636 will be to incorporate other crucial variables that are known to contribute to the behavioral or neural  
637 variabilities in perceptual decision-making such as feedback from the environment (*Dobres and Watanabe,*  
638 *2012; Herzog and Fahle, 1999*). For instance, although we demonstrated the robust stimulus history effects  
639 on inferred criterion in the presence of various types of feedback, we conjecture that feedback itself is  
640 another important factor for criterion inference and are currently extending our formalism such that a  
641 Bayesian decision-maker probabilistically infers internal criterion by taking into account both past stimuli  
642 and feedback in an integrative manner (*Lee et al., 2019*).

## 643 **Methods**

644 The main data were acquired from 18 participants (9 females, aged 20–30 years), who performed the task  
645 inside an MRI scanner. The sample size was determined based on previous SVR studies on fMRI data  
646 (Kahnt *et al.*, 2011a; Kahnt *et al.*, 2011b). The auxiliary data used in some of supplementary figures (*Figure 4-*  
647 *figure supplement 4,5; Figure 5-figure supplement 1; Figure 6-figure supplement 2*) were borrowed from  
648 previously published or in-preparation papers in our lab (Choe *et al.*, 2014, 2016; Lee *et al.*, 2016). The main  
649 data were never published nor used in any previous work, and the origins of the data are specified in *Figure*  
650 *4-figure supplement 4A* to avoid confusions. The Research Ethics Committee of Seoul National University  
651 approved the experimental procedures. All participants gave informed consent and were naïve to the  
652 purpose of the experiments.

653

## 654 **Behavioral data acquisition**

655 *Figure 2* illustrates the behavioral task. While fixating at the screen center, observers were instructed to  
656 view a brief (0.3 s) ring-shape stimulus and classify its size within 1.2 s after stimulus onset into either ‘small’  
657 or ‘large’ by pressing the left-hand and right-hand keys, respectively. The response (left/right) and timing of  
658 each key press were recorded.

659 **Task conditions for the training (pre-scanning) sessions.** Before participating in the main fMRI  
660 experiment, observers had practiced on the task intensively over several (3 to 6) training sessions (~1,000  
661 trials for each session) outside the scanner until they reached an asymptotic level in accuracy. On an initial  
662 block of trials (~400) of each training session, we presented ring stimuli of 24 different, fine-grained radii  
663 (7.65° ~ 10.35°) in the order prescribed by an adaptive staircase (1-up-2-down) method and provided  
664 observers with trial-to-trial feedback based on a fixed, objective criterion (radius of 9°) to help them  
665 understand the goal of the task (, which is to maximize the proportion of correct classification) and to  
666 determine the three threshold-level ring sizes tailored for a given observer. Then, on the following block of  
667 trials (~600), we asked observers to perform the task on this tailored triplet of ring stimuli while providing  
668 them with run-to-run feedback to help them get used to the task conditions under which they will later  
669 perform the task inside the MR scanner. During the training sessions, consecutive trials were apart from  
670 one another by 2.7 s. Note that we opted to train observers with the stimuli that were much larger from  
671 those for the main experiment (mean radius of 2.84°) to avoid any unwanted adaptation or learning effects  
672 at low sensory levels and thus to focus training on the task structure of perceptual classification.

673 **Task conditions for the main (scanning) session.** The task conditions for the main session were  
674 identical to those for the training sessions, except for the following. Consecutive trials were apart from  
675 one another by 13.2 s. The long inter-stimulus interval in conjunction with the brief stimulus presentation  
676 was implemented to minimize possible sensory adaptation to stimuli, and thus to prevent sensory  
677 adaptation in previous trials from interfering with decision processes in a current trial (Nakashima and  
678 Sugita, 2017; Pavan *et al.*, 2012). Observers were not provided with trial-to-trial feedback but with run-to-  
679 run feedback, which was to show the percent correct for a run of 26 trials during each break between scan  
680 runs. Before the fMRI runs, observers inside the MRI scanner repeated what they did during the training  
681 sessions by performing 180 threshold-calibration trials and 54 practice trials with trial-to-trial feedback with  
682 short inter-trial interval (2.7s). We expected that these calibration and practice trials, in addition to the  
683 repetitive alternations between the trial-to-trial-feedback calibration trials and the run-to-run-feedback  
684 practice trials during the training sessions (see above), would help observers perform the task during the  
685 main session in the same way as they did with trial-to-trial feedback. This expectation was supported by  
686 the results that the performance levels in the main session (proportion correct = 75±7%) were similar to  
687 those targeted by the staircase method (70.7%).

688

## 689 **Imaging data acquisition and preprocessing**

690 MRI data were collected using a 3 Tesla Siemens Tim Trio scanner equipped with a 12-channel Head Matrix  
691 coil at the Seoul National University Brain Imaging Center. Stimuli were generated using MATLAB  
692 (MathWorks) in conjunction with MGL (<http://justingardner.net/mgl>) on a Macintosh computer. Observers  
693 looked through an angled mirror attached to the head coil to view stimuli displayed via an LCD projector  
694 (Canon XEED SX60) onto a back-projection screen at the end of the magnet bore at a viewing distance of  
695 87 cm, yielding a field of view of 22 × 17°.

696 For each observer, we acquired three types of MRI images, as follows: (1) 3D, T1-weighted, whole-  
697 brain images (MPRAGE; resolution, 1×1×1 mm; field of view (FOV), 256 mm; repetition time (TR), 1.9 s; time



698 for inversion, 700 ms; time to echo (TE), 2.36; and flip angle (FA), 9°, (2) 2D, T1-weighted, in-plane images  
699 (MPRAGE; resolution, 1.08×1.08×3.3 mm; TR, 1.5 s; T1, 700 ms; TE, 2.79 ms; and FA, 9°), and (3) 2D, T2\*-  
700 weighted, functional images (gradient EPI; TR, 2.2 s; TE, 40 ms; FA, 73°; FOV, 208 mm; image matrix, 90×90;  
701 slice thickness, 3 mm with 10% space gap; slice, 32 oblique transfers slices; bandwidth, 790 Hz/ps; and  
702 effective voxel size, 3.25×3.25×3.3 mm). For univariate analysis, the images of individual observers were  
703 normalized to the MNI template using the following steps: motion correction, coregistration to whole-  
704 brain anatomical images via the in-plane images (*Nestares and Heeger, 2000*), spike elimination, slice timing  
705 correction, normalization using the SPM DARTTEL Toolbox (*Ashburner, 2007*) to 3×3×3 mm voxel size, and  
706 smoothing with 8×8×8 mm full-width half-maximum Gaussian kernel. All the procedures were  
707 implemented with SPM8 and SPM12 (<http://www.fil.ion.ucl.ac.uk/spm>) (*Friston et al., 1996; Jenkinson et al.,*  
708 *2002*), except for spike elimination for which we used the AFNI toolbox (*Cox, 1996*). The first six frames of  
709 each functional scan (the first trial of each run) were discarded to allow hemodynamic responses to reach a  
710 steady state. Then, the normalized BOLD time series at each voxel, each run, and each subject were  
711 preprocessed using linear detrending and high-pass filtering (132 s cut-off frequency with a Butterworth  
712 filter), conversion into percent-change signals, and correction for non-neural nuisance signals by regressing  
713 out mean BOLD activity of cerebrospinal fluid (CSF). To define anatomical masks, probability tissue maps  
714 for individual participants were generated from T1-weighted images, normalized to the MNI space, and  
715 smoothed as were done for the functional images by using SPM12, and then averaged across participants.  
716 Finally, the locations of CSF, white matter, and gray matter were defined as respective groups of voxels in  
717 which the probability was more than 0.5. The preprocessing steps for multivoxel analysis were the same,  
718 but only spatial smoothing was omitted to prevent blurring of the pattern of activity. Unfortunately, in a  
719 few of the subjects, functional images did not cover entire brain areas. Voxels in which data were derived  
720 from fewer than 17 subjects were excluded for further analysis, which included those in the temporal pole,  
721 orbitofrontal, and posterior cerebellum.  
722

## 723 Generative model

724 *Figure 3A* graphically illustrates the generative model. The generative model is the observers' causal  
725 account for noisy sensory measurements, where true ring size,  $Z$ , causes a noisy sensory measurement on  
726 a current trial,  $m_{(t)}$ , which becomes noisier as  $i$  trials elapse, thus turning into a noisy retrieved  
727 measurement of the value of  $Z$  on trial  $t - i$ ,  $r_{(t-i)}$ . Hence, the generative model can be specified with the  
728 three following probabilistic terms, as follows: a prior of  $Z$ ,  $p(Z)$ , a likelihood of  $Z$  given  $m_{(t)}$ ,  $p(m_{(t)}|Z)$ , and  
729 a likelihood of  $Z$  given  $r_{(t-i)}$ ,  $p(r_{(t-i)}|Z)$ .

730 These three terms were all modeled as normal distribution functions (*Figure 3B-D*), the shape of  
731 which is specified with mean and standard deviation parameters,  $\mu$  and  $\sigma$ :  $\mu_0$  and  $\sigma_0$  for the prior,  $\mu_{m_{(t)}}$  and  
732  $\sigma_{m_{(t)}}$  for the likelihood for  $m_{(t)}$ , and  $\mu_{r_{(t-i)}}$  and  $\sigma_{r_{(t-i)}}$  for the likelihood for  $r_{(t-i)}$ . The mean parameters of  
733 the two likelihoods,  $\mu_{m_{(t)}}$  and  $\mu_{r_{(t-i)}}$ , are identical to  $m_{(t)}$  and  $r_{(t-i)}$ ; therefore, the parameters that must be  
734 learnt are reduced to  $\mu_0$ ,  $\sigma_0$ ,  $\sigma_{m_{(t)}}$ , and  $\sigma_{r_{(t-i)}}$ .  $\sigma_{m_{(t)}}$  is assumed to be invariant across different values of  
735  $m_{(t)}$ , as well as across trials. Therefore,  $\sigma_{m_{(t)}}$  is reduced to  $\sigma_m$ . Finally, because  $\sigma_{r_{(t-i)}}$  is assumed to  
736 originate from  $\sigma_m$  and to increase as trials elapse (*Gorgoraptis et al., 2011; Zokaei et al., 2015*),  $\sigma_{r_{(t-i)}}$  is also  
737 reduced to the following parametric function:  $\sigma_{r_{(t-i)}} = \sigma_m(1 + \kappa)^i$ , where  $\kappa > 0$ . In summary, the  
738 generative model is completely specified by the four parameters,  $\theta = \{\mu_0, \sigma_0, \sigma_m, \kappa\}$ .  
739

## 740 Bayesian estimates of stimuli

741 A Bayesian estimate of the value of  $Z$  on a current trial,  $s_{(t)}$ , was defined as the most probable value of a  
742 posterior function of a given sensory measurement  $m_{(t)}$  (*Equation 1*). The posterior  $p(Z|m_{(t)})$  is a  
743 conjugate normal distribution of the prior and likelihood of  $Z$  given the evidence  $m_{(t)}$ , whose mean  $\mu_{s_{(t)}}$   
744 and standard deviation  $\sigma_{s_{(t)}}$  were calculated as follows (*Figure 3c*):

$$745 \mu_{s_{(t)}} = s_{(t)} = (\sigma_0^2 m_{(t)} + \sigma_m^2 \mu_0) / (\sigma_0^2 + \sigma_m^2);$$
$$746 \sigma_{s_{(t)}} = \sigma_s = (\sigma_0 \sigma_m) / \sqrt{\sigma_0^2 + \sigma_m^2}.$$

747 Whenever  $Z$  takes one of the ring sizes  $\{-1, 0, 1\}$  on each trial as  $Z_{(t)}$  (*Figure 3E*), its generative  
748 noise in generating  $m_{(t)}$  was assumed to be equivalent to  $\sigma_m$ . Therefore,  $\sigma_m$  propagates through the  
749 Bayesian estimates of stimulus  $s_{(t)}$ , which results in the sampling distribution of estimates whose mean  
750  $\mu_{p(s_{(t)})}$  and standard deviation  $\sigma_{p(s_{(t)})}$  were calculated as follows (*Figure 5A*):

$$\begin{aligned} \mu_{p(s(t))} &= (\sigma_0^2 Z(t) + \sigma_m^2 \mu_0) / (\sigma_0^2 + \sigma_m^2); \\ \sigma_{p(s(t))} &= \sigma_0^2 \sigma_m / (\sigma_0^2 + \sigma_m^2). \end{aligned}$$

## 754 Bayesian estimates of criterion

755 The Bayesian observer estimates the value of criterion on a current trial,  $c(t)$ , by inferring the most  
756 probable value of a posterior function of a given set of retrieved sensory measurements  
757  $\mathbb{r}(t) = \{r_{(t-1)}, r_{(t-2)}, \dots, r_{(t-n)}\}$  (Equation 2), where the maximum number of measurements that can be  
758 retrieved,  $n$ , was set to 7. Here,  $p(Z|\mathbb{r}(t))$  is a conjugate normal distribution of the prior and likelihoods of  $Z$   
759 given the evidence  $\mathbb{r}(t)$ ,

$$\begin{aligned} p(Z|\mathbb{r}(t)) &\propto p(\mathbb{r}(t)|Z)p(Z) \\ &= p(r_{(t-1)}|Z)p(r_{(t-2)}|Z) \dots p(r_{(t-7)}|Z)p(Z) \end{aligned}$$

760 , whose mean and standard deviation were calculated (Bromiley, 2003) based on the knowledge of how  
761 the retrieved stimulus becomes noisier as trials elapse (Figure 3B):

$$\begin{aligned} \mu_{c(t)} &= c(t) = \beta_0 \mu_0 + \sum_{i=1}^7 \beta_i r_{(t-i)}; \\ \sigma_{c(t)} &= \sqrt{\beta_0^2 \sigma_0^2 + \sum_{i=1}^7 \beta_i^2 \sigma_{r_{(t-i)}}^2} \end{aligned}$$

764 , where  $\beta_0 = \sigma_0^{-2} / (\sigma_0^{-2} + \sum_{i=1}^7 \sigma_{r_{(t-i)}}^{-2})$  and  $\beta_i = \sigma_{r_{(t-i)}}^{-2} / (\sigma_0^{-2} + \sum_{i=1}^7 \sigma_{r_{(t-i)}}^{-2})$ .

765 Much like stimulus estimates, the sampling distribution of criterion estimates have a mean  $\mu_{p(c(t))}$   
766 and a standard deviation  $\sigma_{p(c(t))}$  due to generative noise propagation, and they were calculated as follows  
767 (Figure 5A):

$$\begin{aligned} \mu_{p(c(t))} &= \beta_0 \mu_0 + \sum_{i=1}^7 \beta_i Z(t); \\ \sigma_{p(c(t))} &= \sqrt{\sum_{i=1}^7 \beta_i^2 \sigma_{r_{(t-i)}}^2}. \end{aligned}$$

## 771 The constant-criterion model

772 The constant-criterion model has two parameters, bias  $\mu_0$  and measurement noise  $\sigma_m$ . Stimulus estimates,  
773  $s(t)$ , were assumed to be sampled from a normal distribution,  $\mathcal{N}(Z(t), \sigma_m)$ . Each stimulus sample has  
774 uncertainty  $\sigma_{s(t)} = \sigma_m$ . Criterion estimate  $c(t)$  was assumed to be a constant value,  $\mu_0$ ; thus  $\sigma_{p(c(t))} =$   
775  $\sigma_{c(t)} = 0$ .

## 777 Converting Bayesian estimates into choice fraction, decision uncertainty, 778 and decision variable

779 On each trial, the Bayesian observer makes a binary decision  $d(t)$  by comparing  $s(t)$  and  $c(t)$ , such that  $d(t) =$   
780 'large' if  $s(t) > c(t)$ , and  $d(t) =$  'small' if  $s(t) < c(t)$ . Thus, given the generative noise propagation, the  
781 fraction of 'large' choices,  $pL(t)$ , was defined as the proportion of the bivariate sampling distribution that

782 satisfied the inequality of  $s(t) > c(t)$ :  $pL(t) = \Phi\left[\frac{\mu_{p(s(t))} - \mu_{p(c(t))}}{\sqrt{\sigma_{p(s(t))}^2 + \sigma_{p(c(t))}^2}}\right]$ , where  $\Phi$  is cumulative normal distribution

783 (Marzban, 2004). However, decisions are not made deterministically but probabilistically, because  $s(t)$  and  
784  $c(t)$  have their respective imprecisions parameterized with  $\sigma_{s(t)}$  and  $\sigma_{c(t)}$ . Thus, when committing to a  
785 decision with  $s(t)$  and  $c(t)$ , the Bayesian observer calculates the probability of  $s(t) > c(t)$ , which is called the  
786 decision variable,  $v(t)$ , defined as  $v(t) = \Phi\left[\frac{s(t) - c(t)}{\sqrt{\sigma_s^2 + \sigma_c^2}}\right]$ , and the decision uncertainty,  $u(t)$ , which represents

787 the odds that the current decision will be incorrect, as follows:  $u(t) = \Phi\left[\frac{-|s(t) - c(t)|}{\sqrt{\sigma_s^2 + \sigma_c^2}}\right]$  (Figure 3E,F).

788

## 789 Estimating generative model parameters

790 For each human observer,  $j$ , the parameters of the generative model,  $\hat{\theta}_j$ , were estimated as those  
791 maximizing the sum of log likelihoods for  $N$  individual choices made by the observer,  
792  $\vec{D}_{j(t)} = [D_{j(1)}, D_{j(2)}, \dots, D_{j(N)}]$ :

$$\hat{\theta}_j = \arg \max_{\theta} \sum_{t=1}^N \log p(D_{j(t)}|\theta)$$

793 , where  $p(D_{j(t)}|\theta) = p_{L(t)}$  for  $D_{j(t)} = \text{'large'}$  and  $p(D_{j(t)}|\theta) = 1 - p_{L(t)}$  for  $D_{j(t)} = \text{'small'}$ . See *Figure 3-figure*  
 794 *supplement 1* for the detailed procedure and results of parameter estimation.

795

## 796 Comparing Bayesian and human decision behavior

797 Estimating the generative model parameters separately for the 18 human observers allowed us to create  
 798 the same number of Bayesian observers, each tailored to each human individual. By repeating the  
 799 experiment on these Bayesian observers using stimulus orders that were identical to those presented to  
 800 their human counterparts, we acquired a sufficient number ( $10^6$  repetitions) of simulated choices,  $d_{(t)}$ ,  
 801 decision uncertainty values,  $u_{(t)}$ , and stimulus estimate,  $s_{(t)}$ , and criterion estimate,  $c_{(t)}$ , based on pairs of  
 802 random samples drawn from the stimulus and criterion estimate distributions (which are specified by  
 803  $\mu_{p(s_{(t)})}$  with  $\sigma_{p(s_{(t)})}$ , and  $\mu_{p(c_{(t)})}$  with  $\sigma_{p(c_{(t)})}$ , respectively) on each trial for each observer. Then, those  
 804 simulated outcomes were each averaged across the  $10^6$  simulations. When predicting  $s_{(t)}$ ,  $c_{(t)}$ ,  $v_{(t)}$ , and  $u_{(t)}$   
 805 for the observed choice  $D_{(t)}$ , we only included the simulation outcomes in which the relation between  $s_{(t)}$   
 806 and  $c_{(t)}$  (i.e.,  $d_{(t)}$ ) matched the observed choice  $D_{(t)}$ .

807 To check the correspondence between the Bayesian and human observers in choice fraction, we  
 808 first sorted trials based on current stimuli, which resulted in three different stimulus size conditions. Then,  
 809 for each condition, we further sorted trials into normalized bins of  $\mu_{p(c_{(t)})}$  (*Figure 5D*) or  $\mu_{p(s_{(t)})} - \mu_{p(c_{(t)})}$   
 810 (*Figure 6D*), and pitted Bayesian  $p_{L(t)}$  against human  $p_{L(t)}$  over the different stimulus conditions. To check  
 811 the Bayesian-human correspondence in the impact of previous stimuli and previous choices on current  
 812 choices, we logistically regressed the human choice sequence onto stimuli and choices, both on current  
 813 and previous trials concurrently, using the following model to obtain regression coefficients  
 814  $\vec{p} = [p_1, \dots, p_{11}]$  for each observer (*Figure 4C*):

815  $\vec{D}_{(t)} \sim e^{\vec{K}_{(t)}} / (1 + e^{\vec{K}_{(t)}})$ , where  $\vec{K}_{(t)} = p_0 + p_1 \vec{Z}_{(t)} + \sum_{i=1}^5 (p_{1+i} \vec{Z}_{(t-i)} + p_{6+i} \vec{D}_{(t-i)})$ , the independent variables  
 816 were each standardized into z-scores for each observer and  $\vec{D}_{(t)} = [D_{(1)}, \dots, D_{(N)}]$ ,  $\vec{K}_{(t)} = [K_{(1)}, \dots, K_{(N)}]$ ,  
 817  $\vec{Z}_{(t)} = [Z_{(1)}, \dots, Z_{(N)}]$ . The Bayesian observers' choices were also regressed with the logistic regression  
 818 model by substituting  $\vec{d}_{(t)}$  for  $\vec{D}_{(t)}$  (*Figure 4A*) where  $\vec{d}_{(t)} = [d_{(1)}, \dots, d_{(N)}]$ . The regression was repeatedly  
 819 carried out for each simulation, and the estimated coefficients  $\vec{p}$  were averaged across the simulations.  
 820 Due to the time consumption of regression, the number of simulations for regression ( $10^5$  repetitions) was  
 821 compromised, and was smaller than that for  $p_{L(t)}$  prediction ( $10^6$ ). However, we confirmed that the  
 822 simulation number was sufficiently large to produce stable simulation outcomes.

823 To check the correspondence between Bayesian decision uncertainty  $u_{(t)}$  and human RT, we took  
 824 both stimuli and choices into account, because  $u_{(t)}$  under the same stimulus condition is contingent on the  
 825 choice made in a given trial (*Figure 5C*). Thus, we sorted trials into six different conditions (three stimulus  
 826 sizes  $\times$  two choices) and then further sorted the trials in each condition into normalized bins of  $\mu_{p(c_{(t)})}$   
 827 (*Figure 5E*), where the normalized values of  $u_{(t)}$  and human RT were compared. To convert  $u_{(t)}$  values into  
 828 the values comparable to RT, we regressed RT onto  $u_{(t)}$  using a generalized linear mixed model (GLMM),  
 829  $\vec{RT}_{(t)} \sim \beta_0 + \beta_1 \vec{u}_{(t)}$ , with a random effect of individual observers, where  $\vec{RT}_{(t)} = [RT_{(1)}, \dots, RT_{(N)}]$  and  
 830  $\vec{u}_{(t)} = [u_{(1)}, \dots, u_{(N)}]$ . Then, ' $\beta_0 + \beta_1 \vec{u}_{(t)}$ ' were pitted against human RT data. To check the Bayesian-human  
 831 correspondence in the impact of previous stimuli on decision uncertainty, we regressed the Bayesian  
 832 decision uncertainty estimates  $\vec{u}_{(t)}$  or human RTs  $\vec{RT}_{(t)}$  on current trials onto the congruency of current and  
 833 past stimuli with a current choice using the following model to obtain regression coefficients by GLMM  
 834 with a random effect of individual observers (*Figure 4D*):

835  $\vec{RT}_{(t)} \sim q_0 + \sum_{i=0}^5 q_{i+1} g_{Z(t-i)} + \sum_{i=1}^5 q_{i+6} g_{D(t-i)}$ , where  
 836  $g_{Z(t-i)} = 1$  if  $Z_{(t-i)} = D_{(t)}$  and  $Z_{(t-i)} \neq 'M'$ ;  
 837  $g_{Z(t-i)} = -1$  if  $Z_{(t-i)} \neq D_{(t)}$  and  $Z_{(t-i)} \neq 'M'$ ;  
 838  $g_{Z(t-i)} = 0$  if  $Z_{(t-i)} = 'M'$ ;  
 839  $g_{D(t-i)} = 1$  if  $D_{(t-i)} = D_{(t)}$ ;  
 840  $g_{D(t-i)} = -1$  if  $D_{(t-i)} \neq D_{(t)}$ .

841 For the regression analysis, the independent and dependent variables were both standardized into z-  
 842 scores for each observer. For comparison, the regression coefficients for Bayesian decision uncertainty  
 843 were calculated as  $\vec{u}_{(t)} \sim \hat{q}_0 + \sum_{i=0}^5 \hat{q}_{i+1} g_{Z(t-i)} + \sum_{i=1}^5 \hat{q}_{i+6} g_{D(t-i)}$  by GLMM with random effect of individual

844 observers (**Figure 4B**), and linearly re-scaled to those for human RT using the following GLM:  
845  $\sum_{i=0}^{11} q_i \sim \gamma(\sum_{i=0}^{11} \hat{q}_i)$ .  
846

## 847 **Comparing Bayesian decision uncertainty and human BOLD activity**

848 At each of the six time points,  $i$ , within a single trial,  $t$ , BOLD responses,  $B_{(v,t,i)}$ , of each cortical voxel,  $v$ ,  
849 were regressed onto  $u_{(t)}$  to identify brain regions whose activity was correlated with  $u_{(t)}$  using the  
850 following GLMM with random effects of individual observers:

$$851 \quad \vec{B}_{(v,t,i)} \sim \beta_{0(v,i)} + \beta_{1(v,i)} \vec{u}_{(t)},$$

852 where  $\vec{B}_{(v,t,i)} = [B_{(v,1,i)}, \dots, B_{(v,N,i)}]$ . For the regression analysis, the independent and dependent variables  
853 were both standardized into z-scores for each observer. We first localized cortical sites where  $\beta_{1(v,i)}$  were  
854 statistically significant after correcting for the false discovery rate (FDR) (*Benjamini and Hochberg, 1995*)  
855 over the entire brain voxels tested at each time point,  $i$ . Then, we identified voxel clusters covering a  
856 region larger than  $350 \text{ mm}^3$  ( $> 12$  contiguous voxels) in which the voxels' FDR-corrected p-values were less  
857 than 0.05 and raw p-values were less than  $10^{-4}$  as regions of interest (ROIs). For ROI analysis, BOLD signals  
858 were averaged over individual voxels, and their correspondences with Bayesian decision uncertainty were  
859 calculated using the same procedure as that used for RT data analysis.  
860

## 861 **Searching for multivoxel patterns of activity signaling latent model** 862 **variables**

863 To decode the model's latent variables from the BOLD signal, the time-resolved support vector regression  
864 (SVR) was carried out in conjunction with a searchlight technique (*Haynes, 2015; Kahnt et al., 2011b*). At  
865 each of the first four time points,  $i$ , within a single trial,  $t$ ,  $B_{(e,k,t,i)}$  (which represents the preprocessed but  
866 unsmoothed BOLD signals of a voxel cluster centered at a gray-matter voxel,  $e$ , where  $k \in \{1, 2, \dots\}$  denotes  
867 an entire set of voxels that comprise the cluster) was selected as a searchlight. The first four time points  
868 were chosen given that the latent variables must precede  $u_{(t)}$ , which was detected at the fourth time point  
869 in the dACC. Although the searchlight cluster had a radius of 9 mm and thus consisted of 123 voxels, the  
870 exact number of voxels in each searchlight varied, because the voxels located in CSF or white matter were  
871 discarded as non-neural signals. For each observer, the model's latent variables ( $s_{(t)}$ ,  $c_{(t)}$ , and  $v_{(t)}$ ) were  
872 decoded for each searchlight using the cross-validation method of one-run-leave-out (8-fold cross-  
873 validation). We note that one might expect the fine-retinotopy-based population decoding method  
874 developed in our previous imaging work (*Choe et al., 2014*) to be applied to decode  $s_{(t)}$  in the early visual  
875 areas. We chose not to do so for several reasons. First, while the population decoding method in Choe et al.  
876 (2014) was developed to decode external stimuli by assigning decoding weights to individual voxels based on  
877 the retinotopy (eccentricity) map acquired a priori, the latent variable  $s_{(t)}$  does not represent external  
878 physical stimuli per se but inferred stimuli that partake with  $c_{(t)}$  in causing  $v_{(t)}$ . For such a latent variable,  
879 whose values stochastically vary on a trial-to-trial basis, the time-resolved SVR method is more appropriate  
880 because voxel weights can flexibly learned via training. Second, we, of course, did not want to preclude the  
881 possibility that  $s_{(t)}$  is represented in the early visual cortex or to limit our search of brain signals of  $s_{(t)}$   
882 within the early visual cortex either. In this regard, the SVR method in conjunction with searchlight is more  
883 appropriate than the retinotopy-based population decoding method, because the former can be applied  
884 impartially to any local regions throughout the entire brain whereas the latter can be applied only to those  
885 with fine retinotopy maps. Lastly, the spatial resolution of fMRI signals in the current study (voxel size,  
886  $3.25 \times 3.25 \times 3.3 \text{ mm}$ ) is not appropriate for the fine-grained-retinotopy-based population decoding method  
887 (e.g., voxel size of  $2.0 \times 2.0 \times 1.998 \text{ mm}$  (retinotopy scans) and  $2.3 \times 2.3 \times 2.3 \text{ mm}$  (experimental scans) were  
888 used in Choe et al. (2014)). We performed the SVR using the LIBSVM  
889 (<http://www.csie.ntu.edu.tw/~sjlin/libsvm>) with a linear kernel and constant regularization parameter as 1.  
890  $B_{(e,k,t,i)}$  and the latent variables were z-scored on each voxel and for each subject before decoding. To  
891 calculate the significance level of the decoded information, each 3D map that represented the decoded  
892 values of the latent variables ( $v_{B(e,t,i)}$ ,  $c_{B(e,t,i)}$ , or  $s_{B(e,t,i)}$ ) was smoothed with a 5 mm FWHM Gaussian kernel.  
893 We regressed the smoothed  $v_{B(e,t,i)}$ ,  $c_{B(e,t,i)}$ , and  $s_{B(e,t,i)}$  to  $v_{(t)}$ ,  $c_{(t)}$ , and  $s_{(t)}$ , respectively, using 16, 13, and 13  
894 regression models, respectively. We concluded that a given cluster carries the neural signals of  $v_{(t)}$ ,  $c_{(t)}$ , or  
895  $s_{(t)}$ , only when all those regression models are satisfied over 12 contiguous searchlights. Those regression  
896 models were predicted by the causal relationships between the model latent variables (**Figure 7-figure**  
897 **supplement 1**). For the ROI analysis (**Figure 7C-G**), the decoded values of a given latent variable were

898 averaged over the all searchlights within each ROI. For the data-driven Bayesian network analysis (*Figure*  
899 *7G*; *Figure 7-figure supplement 4*), we derived an exhaustive set of causal structures between the brain  
900 signals of latent model variables and calculated BIC for each structure (*Scutari, 2009*). The brain imaging  
901 results were visualized using xjView toolbox for the cross sectional images and Connectome Workbench  
902 (*Marcus et al., 2011*) for the inflated images.  
903

## 904 **Statistical tests**

905 To calculate confidence intervals, a set of bootstrap-sampled data was obtained by resampling  $10^5$  times  
906 with repetition, and the mean and interval size of the threshold (e.g., 95%) were then computed for the  
907 bootstrap data set. For all statistics, 18 individuals were used except the whole brain analysis, in which  
908 statistics at some of ventral area were calculated with 17 individuals. Statistical significances were  
909 calculated using two-tailed tests, except for the regression models for decoding the model's latent  
910 variables form neural information (*Figure 7-figure supplement 1*).  
911

## 912 **Data and code availability**

913 The codes for reproducing main results are available at [https://github.com/Heeseung-](https://github.com/Heeseung-Lee/LeeLeeChoeLee2019/tree/master/code)  
914 [Lee/LeeLeeChoeLee2019/tree/master/code](https://github.com/Heeseung-Lee/LeeLeeChoeLee2019/tree/master/code). The behavior data, raw MRI data, BOLD activity of dACC, and the  
915 decoded latent variables with SVR are available at [https://github.com/Heeseung-](https://github.com/Heeseung-Lee/LeeLeeChoeLee2019/tree/master/data)  
916 [Lee/LeeLeeChoeLee2019/tree/master/data](https://github.com/Heeseung-Lee/LeeLeeChoeLee2019/tree/master/data). The statistical parametric maps of the results of whole brain  
917 analysis are available at <https://github.com/Heeseung-Lee/LeeLeeChoeLee2019/tree/master/SPM>.  
918  
919

## 920 **Acknowledgement**

921 We thank J.S. Lim and J. Ahn for their advice on data analysis, D.S. Lim for his advice on modeling, H.W. Gu  
922 for sharing his tips on Bayesian-network analysis, and I. Rhim for sharing his data. This research was  
923 supported by the Brain Research Programs and Basic Research Laboratory Program through the National  
924 Research Foundation of Korea (NRF) funded by the Ministry of Science and ICT of South Korea (No. NRF-  
925 2015M3C7A1031969, NRF-2017M3C7A1047860 for the Brain Research Programs; NRF-2018R1A4A1025891 for  
926 the Basic Research Laboratory Program).  
927  
928

## 929 **Additional information**

### 930 **Author contributions**

931 K.W.C. and S.H.L. designed the experiments. K.W.C. ran experiments. H.L. performed the analyses. H.L. and  
932 S.H.L. implemented the models and wrote the manuscript. H.J.L. and K.W.C. preprocessed the auxiliary  
933 data. K.W.C. provided critical revisions.  
934  
935  
936

## 937 **REFERENCES**

- 938  
939 Akrami, A., Kopec, C.D., Diamond, M.E., and Brody, C.D. (2018). Posterior parietal cortex represents sensory  
940 history and mediates its effects on behaviour. *Nature* 554, 368.  
941 Anderson, D., and Burnham, K. (2004). *Model selection and multi-model inference*. Second NY: Springer-  
942 Verlag, 63.  
943 Ashburner, J. (2007). A fast diffeomorphic image registration algorithm. *Neuroimage* 38, 95-113.  
944 Ashby, F. (2001). Categorization and similarity models: Neuroscience applications.  
945 Ashby, F.G., and Ell, S.W. (2001). The neurobiology of human category learning. *Trends in cognitive sciences*  
946 5, 204-210.  
947 Baumann, O., Borra, R.J., Bower, J.M., Cullen, K.E., Habas, C., Ivry, R.B., Leggio, M., Mattingley, J.B.,  
948 Molinari, M., and Moulton, E.A. (2015). Consensus paper: the role of the cerebellum in perceptual  
949 processes. *The Cerebellum* 14, 197-220.  
950 Bays, P.M. (2015). Spikes not slots: noise in neural populations limits working memory. *Trends in cognitive*  
951 *sciences* 19, 431-438.

- 952 Behrens, T.E., Woolrich, M.W., Walton, M.E., and Rushworth, M.F. (2007). Learning the value of  
953 information in an uncertain world. *Nature neuroscience* 10, 1214.
- 954 Benjamin, A.S., Diaz, M., and Wee, S. (2009). Signal detection with criterion noise: Applications to  
955 recognition memory. *Psychological review* 116, 84.
- 956 Benjamini, Y., and Hochberg, Y. (1995). Controlling the false discovery rate: a practical and powerful  
957 approach to multiple testing. *Journal of the royal statistical society Series B (Methodological)*, 289-300.
- 958 Bromiley, P. (2003). Products and convolutions of Gaussian probability density functions. *Tina-Vision Memo*  
959 3, 1.
- 960 Burr, D., and Cicchini, G.M. (2014). Vision: efficient adaptive coding. *Current Biology* 24, R1096-R1098.
- 961 Carlson, J.M., Foti, D., Mujica-Parodi, L.R., Harmon-Jones, E., and Hajcak, G. (2011). Ventral striatal and  
962 medial prefrontal BOLD activation is correlated with reward-related electrocortical activity: a combined  
963 ERP and fMRI study. *Neuroimage* 57, 1608-1616.
- 964 Carter, C.S., Braver, T.S., Barch, D.M., Botvinick, M.M., Noll, D., and Cohen, J.D. (1998). Anterior cingulate  
965 cortex, error detection, and the online monitoring of performance. *Science* 280, 747-749.
- 966 Cavanagh, J.F., and Frank, M.J. (2014). Frontal theta as a mechanism for cognitive control. *Trends in*  
967 *cognitive sciences* 18, 414-421.
- 968 Choe, K.W., Blake, R., and Lee, S.-H. (2014). Dissociation between neural signatures of stimulus and choice  
969 in population activity of human V1 during perceptual decision-making. *Journal of Neuroscience* 34, 2725-  
970 2743.
- 971 Choe, K.W., Blake, R., and Lee, S.-H. (2016). Pupil size dynamics during fixation impact the accuracy and  
972 precision of video-based gaze estimation. *Vision research* 118, 48-59.
- 973 Cox, R.W. (1996). AFNI: software for analysis and visualization of functional magnetic resonance  
974 neuroimages. *Computers and Biomedical research* 29, 162-173.
- 975 Crapse, T.B., Lau, H., and Basso, M.A. (2018). A role for the superior colliculus in decision criteria. *Neuron*  
976 97, 181-194. e186.
- 977 Curtis, C.E., and Lee, D. (2010). Beyond working memory: the role of persistent activity in decision making.  
978 *Trends in cognitive sciences* 14, 216-222.
- 979 Dienes, Z. (2008). *Understanding psychology as a science: An introduction to scientific and statistical*  
980 *inference* (Macmillan International Higher Education).
- 981 Dienes, Z. (2014). Using Bayes to get the most out of non-significant results. *Frontiers in psychology* 5, 781.
- 982 Dobres, J., and Watanabe, T. (2012). Response feedback triggers long-term consolidation of perceptual  
983 learning independently of performance gains. *Journal of vision* 12, 9-9.
- 984 Dyjas, O., Bausenhardt, K.M., and Ulrich, R. (2012). Trial-by-trial updating of an internal reference in  
985 discrimination tasks: Evidence from effects of stimulus order and trial sequence. *Attention, Perception, &*  
986 *Psychophysics* 74, 1819-1841.
- 987 Friston, K.J., Williams, S., Howard, R., Frackowiak, R.S., and Turner, R. (1996). Movement-related effects in  
988 fMRI time-series. *Magnetic resonance in medicine* 35, 346-355.
- 989 Fritsche, M., Mostert, P., and de Lange, F.P. (2017). Opposite effects of recent history on perception and  
990 decision. *Current Biology* 27, 590-595.
- 991 Fründ, I., Wichmann, F.A., and Macke, J.H. (2014). Quantifying the effect of intertrial dependence on  
992 perceptual decisions. *Journal of vision* 14, 9-9.
- 993 Gao, J.-H., Parsons, L.M., Bower, J.M., Xiong, J., Li, J., and Fox, P.T. (1996). Cerebellum implicated in sensory  
994 acquisition and discrimination rather than motor control. *Science* 272, 545-547.
- 995 Ghiselin, M.T. (1981). Categories, life, and thinking. *Behavioral and Brain Sciences* 4, 269-283.
- 996 Glaze, C.M., Kable, J.W., and Gold, J.I. (2015). Normative evidence accumulation in unpredictable  
997 environments. *Elife* 4, e08825.
- 998 Goard, M.J., Pho, G.N., Woodson, J., and Sur, M. (2016). Distinct roles of visual, parietal, and frontal motor  
999 cortices in memory-guided sensorimotor decisions. *Elife* 5, e13764.
- 1000 Gold, J.I., and Shadlen, M.N. (2007). The neural basis of decision making. *Annual review of neuroscience* 30.
- 1001 Good, I.J. (1979). *Studies in the history of probability and statistics. XXXVII AM Turing's statistical work in*  
1002 *World War II. Biometrika*, 393-396.
- 1003 Gorgoraptis, N., Catalao, R.F., Bays, P.M., and Husain, M. (2011). Dynamic updating of working memory  
1004 resources for visual objects. *Journal of Neuroscience* 31, 8502-8511.
- 1005 Green, D.M., and Swets, J.A. (1966). *Signal detection theory and psychophysics* (Oxford, England: John  
1006 Wiley).
- 1007 Griffiths, T.L., Chater, N., Norris, D., and Pouget, A. (2012). How the Bayesians got their beliefs (and what  
1008 those beliefs actually are): Comment on Bowers and Davis (2012).

- 1009 Haller, M., Case, J., Crone, N.E., Chang, E.F., King-Stephens, D., Laxer, K.D., Weber, P.B., Parvizi, J., Knight,  
1010 R.T., and Shestyuk, A.Y. (2018). Persistent neuronal activity in human prefrontal cortex links perception and  
1011 action. *Nature Human Behaviour* 2, 80.
- 1012 Hanks, T.D., Kopec, C.D., Brunton, B.W., Duan, C.A., Erlich, J.C., and Brody, C.D. (2015). Distinct relationships  
1013 of parietal and prefrontal cortices to evidence accumulation. *Nature* 520, 220.
- 1014 Haynes, J.-D. (2015). A primer on pattern-based approaches to fMRI: principles, pitfalls, and perspectives.  
1015 *Neuron* 87, 257-270.
- 1016 Heekeren, H.R., Marrett, S., Ruff, D.A., Bandettini, P., and Ungerleider, L.G. (2006). Involvement of human  
1017 left dorsolateral prefrontal cortex in perceptual decision making is independent of response modality.  
1018 *Proceedings of the National Academy of Sciences* 103, 10023-10028.
- 1019 Hempel, C.G. (1965). Aspects of scientific explanation.
- 1020 Herzog, M.H., and Fahle, M. (1999). Effects of biased feedback on learning and deciding in a vernier  
1021 discrimination task. *Vision research* 39, 4232-4243.
- 1022 Holroyd, C.B., Nieuwenhuis, S., Yeung, N., Nystrom, L., Mars, R.B., Coles, M.G., and Cohen, J.D. (2004).  
1023 Dorsal anterior cingulate cortex shows fMRI response to internal and external error signals. *Nature*  
1024 *neuroscience* 7, 497.
- 1025 Hwang, E.J., Dahlen, J.E., Mukundan, M., and Komiyama, T. (2017). History-based action selection bias in  
1026 posterior parietal cortex. *Nature communications* 8, 1242.
- 1027 Jacob, E.K. (2004). Classification and categorization: a difference that makes a difference.
- 1028 Jasper, A.I., Tanabe, S., and Kohn, A. (2019). Predicting perceptual decisions using visual cortical population  
1029 responses and choice history. *Journal of Neuroscience*, 0035-0019.
- 1030 Jeffreys, H. (1961). *Theory of probability*, Clarendon. (Oxford).
- 1031 Jenkinson, M., Bannister, P., Brady, M., and Smith, S. (2002). Improved optimization for the robust and  
1032 accurate linear registration and motion correction of brain images. *Neuroimage* 17, 825-841.
- 1033 Kahnt, T., Grueschow, M., Speck, O., and Haynes, J.-D. (2011a). Perceptual learning and decision-making in  
1034 human medial frontal cortex. *Neuron* 70, 549-559.
- 1035 Kahnt, T., Heinzle, J., Park, S.Q., and Haynes, J.-D. (2011b). Decoding different roles for vmPFC and dlPFC in  
1036 multi-attribute decision making. *Neuroimage* 56, 709-715.
- 1037 Karnath, H.-O. (2001). New insights into the functions of the superior temporal cortex. *Nature Reviews*  
1038 *Neuroscience* 2, 568.
- 1039 Karnath, H.-O., Ferber, S., and Himmelbach, M. (2001). Spatial awareness is a function of the temporal not  
1040 the posterior parietal lobe. *Nature* 411, 950.
- 1041 Karnath, H.-O., Milner, A.D., and Vallar, G. (2002). *The cognitive and neural bases of spatial neglect* (Oxford  
1042 University Press Oxford:).
- 1043 Kass, R.E., and Raftery, A.E. (1995). Bayes factors. *Journal of the American Statistical Association* 90, 773-  
1044 795.
- 1045 Katz, L.N., Yates, J.L., Pillow, J.W., and Huk, A.C. (2016). Dissociated functional significance of decision-  
1046 related activity in the primate dorsal stream. *Nature* 535, 285.
- 1047 Kepecs, A., Uchida, N., Zariwala, H.A., and Mainen, Z.F. (2008). Neural correlates, computation and  
1048 behavioural impact of decision confidence. *Nature* 455, 227.
- 1049 Kim, J.-N., and Shadlen, M.N. (1999). Neural correlates of a decision in the dorsolateral prefrontal cortex of  
1050 the macaque. *Nature neuroscience* 2, 176.
- 1051 Körding, K.P., and Wolpert, D.M. (2004). Bayesian integration in sensorimotor learning. *Nature* 427, 244.
- 1052 Kriegeskorte, N., Goebel, R., and Bandettini, P. (2006). Information-based functional brain mapping.  
1053 *Proceedings of the National Academy of Sciences* 103, 3863-3868.
- 1054 Lau, H.C. (2007). A higher order Bayesian decision theory of consciousness. *Progress in brain research* 168,  
1055 35-48.
- 1056 Lee, H.-J., Lee, H., Rhim, I., Lim, C.Y., and Lee, S.-H. (2019). Learning criteria from feedback in perceptual  
1057 classification.
- 1058 Lee, H.-J., Rhim, I., and Lee, S.-H. (2016). Optimal and suboptimal integration of sensory and value  
1059 information in perceptual decision-making. *CoSyNe*.
- 1060 Lee, S.-H., Blake, R., and Heeger, D.J. (2007). Hierarchy of cortical responses underlying binocular rivalry.  
1061 *Nature neuroscience* 10, 1048.
- 1062 Li, S., Mayhew, S.D., and Kourtzi, Z. (2009). Learning shapes the representation of behavioral choice in the  
1063 human brain. *Neuron* 62, 441-452.
- 1064 Li, W., Piëch, V., and Gilbert, C.D. (2004). Perceptual learning and top-down influences in primary visual  
1065 cortex. *Nature neuroscience* 7, 651.

- 1066 Luo, T.Z., and Maunsell, J.H. (2018). Attentional changes in either criterion or sensitivity are associated with  
1067 robust modulations in lateral prefrontal cortex. *Neuron* 97, 1382-1393. e1387.
- 1068 Ma, W.J. (2012). Organizing probabilistic models of perception. *Trends in cognitive sciences* 16, 511-518.
- 1069 Ma, W.J., Husain, M., and Bays, P.M. (2014). Changing concepts of working memory. *Nature neuroscience*  
1070 17, 347.
- 1071 Marco-Pallarés, J., Müller, S.V., and Münte, T.F. (2007). Learning by doing: an fMRI study of feedback-  
1072 related brain activations. *Neuroreport* 18, 1423-1426.
- 1073 Marcus, D., Harwell, J., Olsen, T., Hodge, M., Glasser, M., Prior, F., Jenkinson, M., Laumann, T., Curtiss, S.,  
1074 and Van Essen, D. (2011). Informatics and data mining tools and strategies for the human connectome  
1075 project. *Frontiers in neuroinformatics* 5, 4.
- 1076 Marr, D., and Poggio, T. (1976). Cooperative computation of stereo disparity. *Science* 194, 283-287.
- 1077 Marzban, C. (2004). The ROC curve and the area under it as performance measures. *Weather and*  
1078 *Forecasting* 19, 1106-1114.
- 1079 Meyniel, F., Sigman, M., and Mainen, Z.F. (2015). Confidence as Bayesian probability: From neural origins to  
1080 behavior. *Neuron* 88, 78-92.
- 1081 Nakashima, Y., and Sugita, Y. (2017). The reference frame of the tilt aftereffect measured by differential  
1082 Pavlovian conditioning. *Scientific reports* 7, 40525.
- 1083 Nestares, O., and Heeger, D.J. (2000). Robust multiresolution alignment of MRI brain volumes. *Magnetic*  
1084 *Resonance in Medicine: An Official Journal of the International Society for Magnetic Resonance in*  
1085 *Medicine* 43, 705-715.
- 1086 Nienborg, H., and Cumming, B.G. (2009). Decision-related activity in sensory neurons reflects more than a  
1087 neuron's causal effect. *Nature* 459, 89.
- 1088 Norton, E.H., Fleming, S.M., Daw, N.D., and Landy, M.S. (2017). Suboptimal criterion learning in static and  
1089 dynamic environments. *PLoS computational biology* 13, e1005304.
- 1090 Palmer, J., Huk, A.C., and Shadlen, M.N. (2005). The effect of stimulus strength on the speed and accuracy  
1091 of a perceptual decision. *Journal of vision* 5, 1-1.
- 1092 Pavan, A., Marotti, R.B., and Campana, G. (2012). The temporal course of recovery from brief (sub-second)  
1093 adaptations to spatial contrast. *Vision research* 62, 116-124.
- 1094 Pearl, J., Glymour, M., and Jewell, N.P. (2016). *Causal inference in statistics: a primer* (John Wiley & Sons).
- 1095 Petzschner, F.H., Glasauer, S., and Stephan, K.E. (2015). A Bayesian perspective on magnitude estimation.  
1096 *Trends in cognitive sciences* 19, 285-293.
- 1097 Pouget, A., Beck, J.M., Ma, W.J., and Latham, P.E. (2013). Probabilistic brains: knowns and unknowns.  
1098 *Nature neuroscience* 16, 1170.
- 1099 Pourtois, G., Rauss, K.S., Vuilleumier, P., and Schwartz, S. (2008). Effects of perceptual learning on primary  
1100 visual cortex activity in humans. *Vision research* 48, 55-62.
- 1101 Qamar, A.T., Cotton, R.J., George, R.G., Beck, J.M., Prezhdo, E., Laudano, A., Tolias, A.S., and Ma, W.J.  
1102 (2013). Trial-to-trial, uncertainty-based adjustment of decision boundaries in visual categorization.  
1103 *Proceedings of the National Academy of Sciences* 110, 20332-20337.
- 1104 Rahnev, D., and Denison, R.N. (2018). Suboptimality in perceptual decision making. *Behavioral and Brain*  
1105 *Sciences* 41.
- 1106 Ratcliff, R., and McKoon, G. (2008). The diffusion decision model: theory and data for two-choice decision  
1107 tasks. *Neural computation* 20, 873-922.
- 1108 Raviv, O., Ahissar, M., and Loewenstein, Y. (2012). How recent history affects perception: the normative  
1109 approach and its heuristic approximation. *PLoS computational biology* 8, e1002731.
- 1110 Renart, A., and Machens, C.K. (2014). Variability in neural activity and behavior. *Current opinion in*  
1111 *neurobiology* 25, 211-220.
- 1112 Richardson, D.M., and Rejmánek, M. (2011). Trees and shrubs as invasive alien species—a global review.  
1113 *Diversity and distributions* 17, 788-809.
- 1114 Rips, L.J., and Turnbull, W. (1980). How big is big? Relative and absolute properties in memory. *Cognition* 8,  
1115 145-174.
- 1116 Roitman, J.D., and Shadlen, M.N. (2002). Response of neurons in the lateral intraparietal area during a  
1117 combined visual discrimination reaction time task. *Journal of neuroscience* 22, 9475-9489.
- 1118 Sanders, J.I., Hangya, B., and Kepecs, A. (2016). Signatures of a statistical computation in the human sense  
1119 of confidence. *Neuron* 90, 499-506.
- 1120 Schwartz, S., Maquet, P., and Frith, C. (2002). Neural correlates of perceptual learning: a functional MRI  
1121 study of visual texture discrimination. *Proceedings of the National Academy of Sciences* 99, 17137-17142.
- 1122 Scutari, M. (2009). Learning Bayesian networks with the bnlearn R package. arXiv preprint arXiv:09083817.



- 1123 Seltzer, B., and Pandya, D.N. (1994). Parietal, temporal, and occipital projections to cortex of the superior  
1124 temporal sulcus in the rhesus monkey: A retrograde tracer study. *Journal of Comparative Neurology* 343,  
1125 445-463.
- 1126 Shenhav, A., Straccia, M.A., Cohen, J.D., and Botvinick, M.M. (2014). Anterior cingulate engagement in a  
1127 foraging context reflects choice difficulty, not foraging value. *Nature neuroscience* 17, 1249.
- 1128 Sheth, S.A., Mian, M.K., Patel, S.R., Asaad, W.F., Williams, Z.M., Dougherty, D.D., Bush, G., and Eskandar,  
1129 E.N. (2012). Human dorsal anterior cingulate cortex neurons mediate ongoing behavioural adaptation.  
1130 *Nature* 488, 218.
- 1131 Simon, H.A. (1955). A behavioral model of rational choice. *The quarterly journal of economics* 69, 99-118.
- 1132 Treisman, M., and Williams, T.C. (1984). A theory of criterion setting with an application to sequential  
1133 dependencies. *Psychological Review* 91, 68.
- 1134 Urai, A.E., Braun, A., and Donner, T.H. (2017). Pupil-linked arousal is driven by decision uncertainty and  
1135 alters serial choice bias. *Nature communications* 8, 14637.
- 1136 White, C.N., Mumford, J.A., and Poldrack, R.A. (2012). Perceptual criteria in the human brain. *Journal of*  
1137 *Neuroscience* 32, 16716-16724.
- 1138 Wickelgren, W.A., and Norman, D.A. (1966). Strength models and serial position in short-term recognition  
1139 memory. *Journal of Mathematical Psychology* 3, 316-347.
- 1140 Wod, I. (1985). Weight of evidence: A brief survey. *Bayesian statistics*, 249-270.
- 1141 Zariwala, H.A., Kepecs, A., Uchida, N., Hirokawa, J., and Mainen, Z.F. (2013). The limits of deliberation in a  
1142 perceptual decision task. *Neuron* 78, 339-351.
- 1143 Zokaei, N., Burnett Heyes, S., Gorgoraptis, N., Budhdeo, S., and Husain, M. (2015). Working memory recall  
1144 precision is a more sensitive index than span. *Journal of Neuropsychology* 9, 319-329.

| fitting parameter | median, [95% CI]   | fitting boundary |
|-------------------|--------------------|------------------|
| $\sigma_m$        | 0.96, [0.78 1.1]   | [ $10^{-5}$ 5]   |
| $\sigma_0$        | 1.6, [0.71 3.0]    | [ $10^{-5}$ 100] |
| $\mu_0$           | 0.038, [-0.93 3.6] | [-5 5]           |
| $\kappa$          | 0.75, [0.42 1.2]   | [ $10^{-5}$ 5]   |

1145  
1146  
1147  
1148  
1149  
1150  
1151  
1152  
1153  
1154  
1155  
1156  
1157  
1158  
1159  
1160  
1161  
1162  
1163  
1164  
1165  
1166  
1167  
1168  
1169

**Figure3-figure supplement 1.** Estimation of model parameters and confidence intervals with uniform prior bounds. Across-observer median value, its 95% bootstrap confidence interval, and prior bounds are shown for each estimated model parameter. For each subject, estimation was carried out in the following steps: First, we found local minima for parameters using a MATLAB function, ‘fminseachbnd.m’, with the iterative evaluation number set to 50. We repeated this step by choosing 1,000 different initial parameter sets, which were randomly sampled within uniform prior bounds, and acquired 1,000 candidate sets of parameter estimates. Second, from these candidate sets of parameters, we selected the top 20 in terms of goodness-of-fit (sum of log likelihoods) and searched the minima using each of those 20 sets as initial parameters by increasing the iterative evaluation number to 100,000 and setting tolerances of function and parameters to  $10^{-7}$  for reliable estimation. Finally, using the parameters fitted via the second step, we repeated the second step one more time. Then, we selected the parameter set that showed the largest sum of likelihoods as the final estimates for the model parameters. The first trial of each run and the trials on which RTs were too short (less than 0.3 s) or during which no responses were given were used neither for parameter estimation nor for any further analyses. We discarded the first trial of each run for two reasons; first, the criterion-inference model cannot estimate criterion on the first trial since there is not yet an existing measurement to be retrieved; second, the first trial is susceptible to non-specific fMRI signals that are irrelevant to the task. RT was shorter than 0.3s (0.0059s) in one trial, and this was too short to be considered as a task-relevant response. Note that some aspects of the procedure are arbitrary (e.g., the fitting boundaries and the number of initial parameter randomization). So, the outcomes of the fitted model parameters are subject to slight changes depending if those aspects are modified. However, we confirmed that such changes in outcomes are small (results were not shown here) and do not affect the main claims of the current study. The fitting codes and data are available in GitHub (see Methods: Data and code availability).

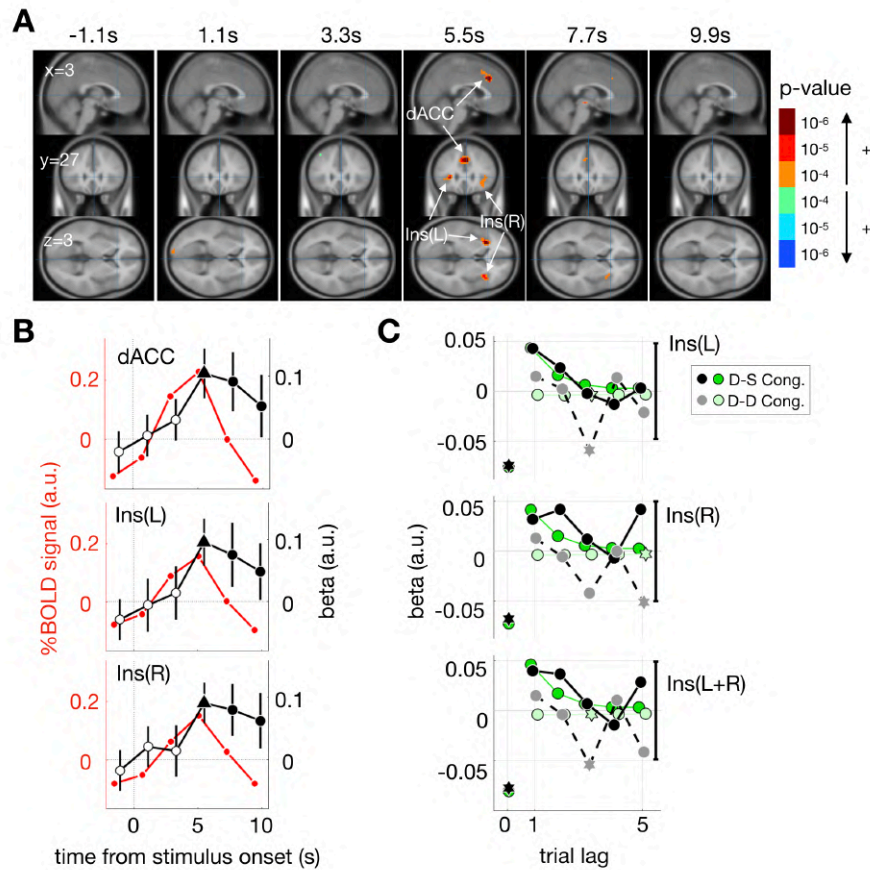

1170  
1171  
1172  
1173  
1174  
1175  
1176  
1177  
1178  
1179  
1180  
1181  
1182  
1183  
1184  
1185  
1186  
1187

**Figure 4-figure supplement 1.** Univariate BOLD signals correlated with decision uncertainty. **(A)** Regressions of BOLD signals at individual cortical sites (voxels) onto  $u_{(t)}$  for each of the 6 time points comprising single trials. Each column shows regression results at each time point, as marked in time elapsed from stimulus onset at the top, by overlaying the thresholded ( $P < 10^{-4}$ , uncorrected) p-values of regression coefficients on the sagittal, coronal, and axial slices of a template brain. Statistically significant ( $P_{FDR} < 0.05$ , FDR-corrected), all positive in sign, regressions on  $u_{(t)}$  were found in the clustered regions in the dACC and the bilateral insula at 5.5 s after stimulus onset. **(B)** For the three ROIs in the dACC and the insula (see Table S2 for specifications of these ROIs), the time courses of the within-ROI averages of BOLD signals (red) are juxtaposed with their regression coefficients on  $u_{(t)}$  (black). Filled circles and filled triangles, coefficients with  $P < 0.05$  and  $P < 10^{-5}$ , respectively. Error bars, standard errors of the mean across observers. **(C)** Results of the multiple linear regressions of BOLD signals onto the congruence of current decisions with stimuli and past decisions are shown for the two ROIs in the insula. The observed regression coefficients (black symbols) are juxtaposed with the simulated regression coefficients (green symbols). Significant coefficients are indicated by hexagons, whereby black hexagons indicate that the 95% CIs of the observed GLMM coefficients did not include zero and green hexagons indicate that the simulated regression coefficients are outside the 95% CIs of the observed GLMM coefficients. Vertical black error bars indicate the average of 95% bootstrap CI for the mean of observed coefficients.

| cortical area                    | correlated time point (s) | volume (mm <sup>3</sup> ) | peak voxel     |                           |                        |
|----------------------------------|---------------------------|---------------------------|----------------|---------------------------|------------------------|
|                                  |                           |                           | MNI coordinate | GLMM p-value of $u_{(t)}$ | GLMM beta of $u_{(t)}$ |
| dorsal anterior cingulate cortex | 5.5                       | 3564                      | [3, 27, 36]    | $1.43 \times 10^{-8}$     | 0.095                  |
| left anterior insula             | 5.5                       | 2268                      | [-27, 24, 6]   | $4.6 \times 10^{-8}$      | 0.095                  |
| right anterior insula            | 5.5                       | 2619                      | [33, 18, 6]    | $8.3 \times 10^{-7}$      | 0.082                  |

1188  
1189

1190 **Figure4-figure supplement 2.** Specifications of the ROIs in which activity was correlated with decision  
1191 uncertainty. When a set of constraints (uncorrected  $P < 10^{-4}$ , FDR-corrected  $P < 0.05$ , cluster size  $> 324 \text{ mm}^3$   
1192 (or contiguous voxels  $> 12$ )) was applied, three regions of interest (ROIs) were significantly correlated with  
1193  $u_{(t)}$  at the fourth fMRI time point (5.5s after stimulus onset)– the dACC, left insula, and right insula. GLMM  
1194 was two-tailed test.

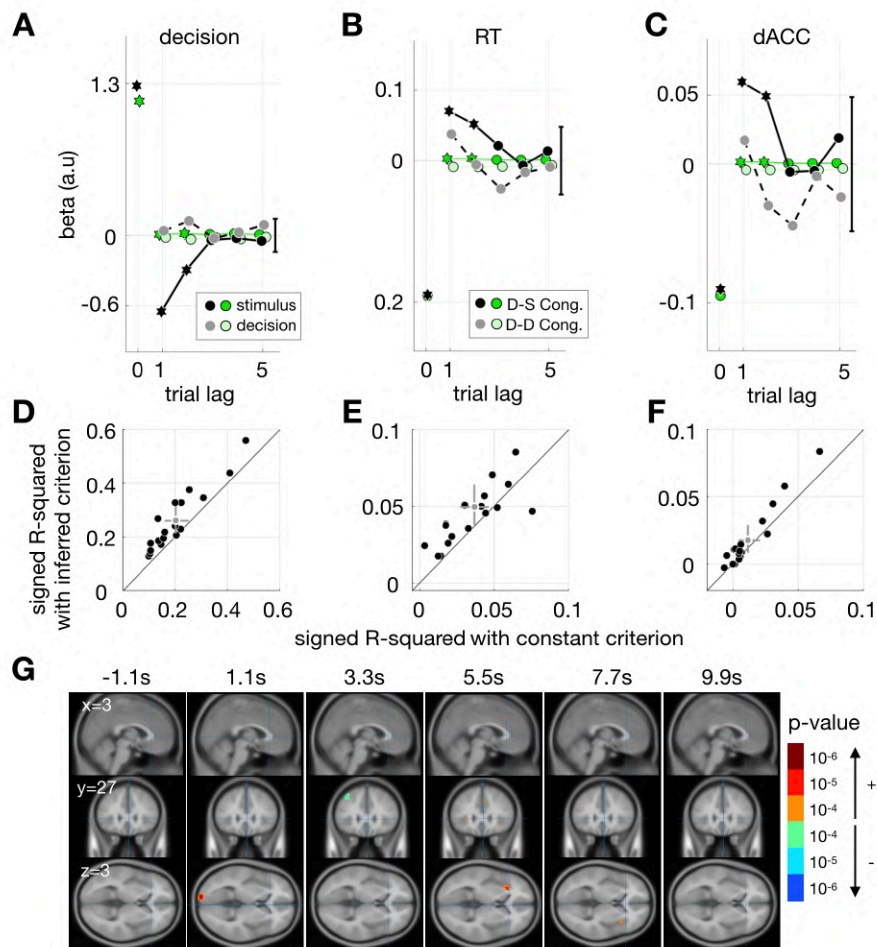

1195  
1196

1197 **Figure 4-figure supplement 3.** Limitations of the constant-criterion model. The constant-criterion model  
1198 offers no account for stimulus history effects on current decision-making (A-C), leaves substantial trial-to-  
1199 trial variability in decision-making unexplained (D-F), and does a poor job of detecting the brain signals  
1200 associated with decision uncertainty (G). (A) Multiple logistic regressions of current decisions onto stimuli  
1201 and past decisions. Black hexagons indicate that the logistic regression coefficients of the observed  
1202 decision significantly deviated from zero (pairwise t-test  $P < 0.05$ ), and green hexagons indicate that the  
1203 model's predictions significantly deviated from the coefficients of observed decision (pairwise t-test  $P <$   
1204  $0.05$ ). (B, C) Multiple regressions of RT and dACC activity onto the congruence of current decisions with  
1205 stimuli and past decisions. Black hexagons mark the observed GLMM coefficients whose 95% CIs did not  
1206 include zero, which indicates significant effects of stimuli and stimulus-decision congruences on human  
1207 observers' decision-making. Green hexagons mark the simulated regression coefficients that are outside  
1208 the 95% CIs of the observed coefficients, which indicates significant deviations of the simulation from the  
1209 observation. (A-C) Black and green symbols represent the coefficients for observed and simulated data,  
1210 respectively. Vertical black error bars indicate the average of 95% CI for the mean of observed coefficients  
1211 (A: bootstrap CI; B, C: GLMM CI). Note that the constant-criterion model manages to simulate the effects  
1212 of current stimuli on current decision-making, but, not surprisingly, is incapable of providing any account for  
1213 the effects of past stimuli on current decision-making, as indicated by the near-zero green regression  
1214 coefficients. (D-F) The proportions of variance explained by the criterion-inference model are pitted  
1215 against those by the constant-criterion model across individual observers (indicated by black dots), for  
1216 decision (D), RT (E), and dACC activity (F). Gray dots with cross hairs represent across-observer means with  
1217 95% bootstrap CI of the means. As indicated by the placements of black and gray dots above the diagonal  
1218 identity line, the substantive proportions of variance unexplained by the constant-criterion model could be  
1219 explained by the criterion-inference model. These increases of the proportions of explained variance,  
1220  $\frac{\text{Var}_{\text{inferred}} - \text{Var}_{\text{constant}}}{\text{Var}_{\text{constant}}}$ , were 29%, 34%, and 49% for decision, RT, and dACC activity, respectively. (G)  
1221 Regressions of BOLD signals at individual cortical sites (voxels) onto  $u_{(t)}$  for each of the 6 time points

1222 comprising single trials. The formats are identical to those in *Figure 4-figure supplement 1*, except for the  
1223 fact that the regressor  $u_{(t)}$  was estimated by the constant-criterion model. When compared to the results  
1224 shown in *Figure 4-figure supplement 1A* the cortical sites with significant regressions substantially  
1225 decreased both in quantity (as indicated by the reduced cluster size) and in quality (as indicated by the high  
1226 range of p-values), failing to appear in the dACC. This implies that the constant-criterion model is limited in  
1227 accounting for dACC activity, which has been previously shown to reflect decision uncertainty or task  
1228 difficulty.  
1229

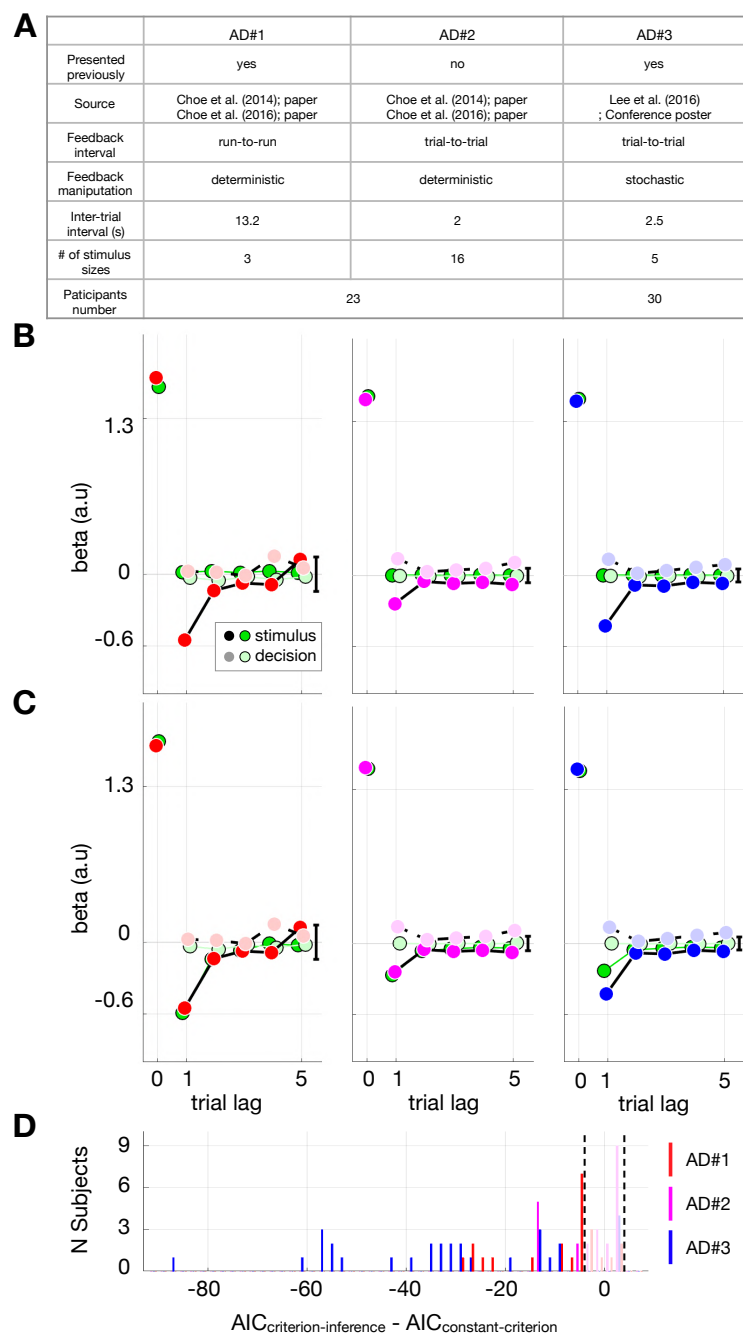

1230  
1231  
1232  
1233  
1234  
1235  
1236  
1237  
1238  
1239  
1240  
1241  
1242  
1243  
1244  
1245

**Figure 4-figure supplement 4.** Verifying the model predictions of the impacts of past stimuli on current decisions with different sets of stimuli, feedback types, and inter-trial-interval lengths. Four auxiliary sets of data were used for this verification.

(A) Specifications of the data sets for their origins and experimental procedures. Auxiliary data set #1, #2, and #3 (AD#1~#3) were borrowed from the works conducted with different purposes in our lab. The specifics of these data sets were as follows: AD#1 was previously published in one of our previous studies (Choe et al., 2014, 2016), which was contributed by 23 observers, each of whom performed 162 trials on the ring stimuli of 3 different sizes ( $2.80^\circ \sim 2.88^\circ$ ), with run-to-run and deterministic (see below for definition) feedback and inter-trial interval of 13.2 s. AD#2 is the training sessions' data of AD#1 and has not been published before. It was contributed by the 23 observers participated in AD#1, each of whom performed 315 trials on the ring stimuli of 16 different ring sizes ( $2.72^\circ \sim 2.95^\circ$ ) presented via a staircase method (1-up-2-down), with trial-to-trial and deterministic feedback and inter-trial interval of 2 s. (see (Choe et al., 2014, 2016) for other methodological details); AD#3 was contributed by 30 observers, each of whom performed 1,700 trials on the ring stimuli of 5 different ring sizes ( $3.84^\circ, 3.92^\circ, 4.00^\circ, 4.08^\circ, 4.16^\circ$ ), with trial-to-trial and

1246 stochastic (see below for definition) feedback and inter-trial interval of 2.5 s. AD#3 corresponds to the data  
1247 of our preliminary poster presentation (*Lee et al., 2016*). Deterministic feedback refers to the use of a single  
1248 fixed objective criterion (AD#1 and AD#2) whereas stochastic feedback refers to the use of objective  
1249 criteria with a small degree of trial-to-trial variability (AD#3). Stimulus duration was 0.3s for all the data sets.  
1250 **(B-C)** Multiple logistic regressions of current decisions onto past/current stimuli and past decisions. Green  
1251 symbols represent the regression coefficients for the simulated data by the constant-criterion model **(B)** or  
1252 by the criterion-inference model **(C)**. Non-green symbols represent the regression coefficients for the  
1253 auxiliary sets of observed data and are re-plotted in **B** and **C** for model comparisons. Dark colors,  
1254 coefficients for stimulus regressors; Light colors, coefficients for decision regressors. Importantly, as  
1255 predicted by the criterion-inference model (dark green symbols in **C**), a previous stimulus with trial lag of 1  
1256 showed a strong negative correlation with a current decision in each and every data set (non-green color  
1257 symbols in **B** and **C**; see *Figure 4* and related parts in the main text for this prediction), which was failed to  
1258 be captured by the constant-criterion model (dark green symbols in **B**).  
1259 **(D)** Comparisons of the criterion-inference model and the constant-criterion model in the accountability for  
1260 the decisions in the auxiliary data sets. The data accountability was assessed by AIC values. The AIC value  
1261 differences greater than 4 between nested models, which are demarcated by dashed vertical lines, are  
1262 conventionally considered to be significant (*Anderson and Burnham, 2004*). When fit to the auxiliary data  
1263 sets, the criterion-inference model was significantly superior to the constant-criterion model for  
1264 substantive fractions of observers for all of the auxiliary data sets (70%, 30% and 87% for AD#1, 2 and 3  
1265 respectively, bold bars of colors).



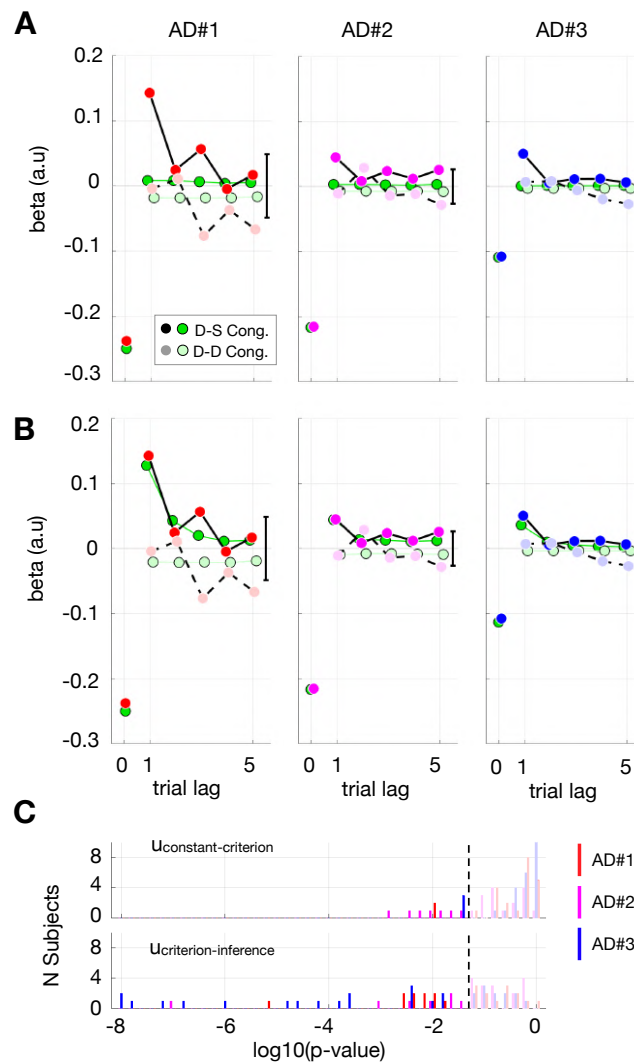

1266  
1267  
1268  
1269  
1270  
1271  
1272  
1273  
1274  
1275  
1276  
1277  
1278  
1279  
1280  
1281  
1282  
1283  
1284  
1285  
1286  
1287  
1288

**Figure 4-figure supplement 5.** Verifying the model predictions of the impacts of past stimuli on current RTs with different sets of stimuli, feedback types, and inter-trial-interval lengths. This verification was based on the same auxiliary sets of data that were described in *Figure 4-figure supplement 4A*.

(A-B) Multiple linear regressions of RTs (observed data) or decision uncertainty (simulated model behavior) onto the congruency between current decisions and current/past stimuli (D-S Cong.; dark symbols) and the congruency between current decisions and current/past decisions (D-D Cong.; light symbols). Green symbols represent the regression coefficients for the simulated data by the constant-criterion model (A) or by the criterion-inference model (B). Non-green symbols represent the regression coefficients for the auxiliary sets of observed data and are re-plotted in B and C for model comparisons. Importantly, as predicted by the criterion-inference model (dark green symbols in B), current decision RTs were positively regressed onto the congruency between current decisions and past stimuli in each and every data set (non-green color symbols in A and B; see *Figure 4* and related parts in the main text for this prediction), which was failed to be captured by the constant-criterion model (dark green symbols in A).

(C) Comparisons of the criterion-inference model and the constant-criterion model in the accountability for the decision RTs in the auxiliary data sets. The data accountability was assessed by the multiple regression of the RTs observed from individual observers onto the decision uncertainty values simulated by the both models using a model of regression,  $RT \sim \beta_0 + \beta_C u_{Const.Cri.} + \beta_I u_{Inf.Cri.}$ , where  $u_{Const.Cri.}$ ,  $u_{Inf.Cri.}$  refer to the trial-to-trial expected values of decision uncertainty simulated by the constant-criterion and criterion-inference model, respectively. The statistically significant regression coefficients at the individual level are demarcated by bold bars. The criterion-inference model explained the RT data better than the constant-criterion model: the significant regression coefficients between observed RTs and decision uncertainty were more prevalent for the criterion-inference model (46.1%) than for the constant-criterion model (15.8%);

1289 the regression coefficients between observed RTs and decision uncertainty were higher for the criterion-  
1290 inference model than for the constant-criterion model in 73.7% of observers.

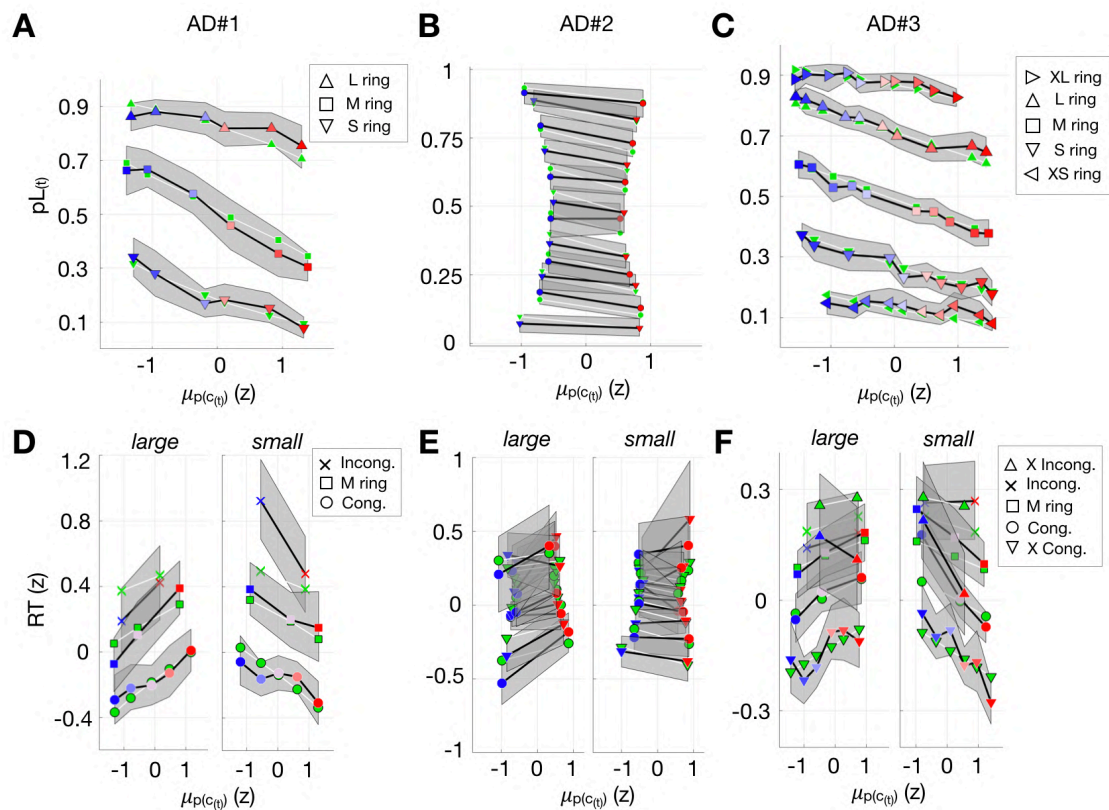

1291  
1292

1293 **Figure 5-figure supplement 1.** Verifying the model's accountability for respective contributions of stimulus  
1294 and criterion with different sets of stimuli, feedback types, and inter-trial-interval lengths.

1295 (A-F) Juxtaposition of the observed data (markers in a blue-to-red spectrum) and the criterion-inference  
1296 model predictions based on simulation (green markers). As for the markers in blue-to-red spectrum,  
1297 color shifts from blue to red as the inferred criterion ( $\mu_p(c_{(t)})$ ) increases. Gray patches represent 95% bootstrap  
1298 confidence interval of the across-participant means.

1299 (A-C) Proportions of 'large' responses (pL) plotted as a function of inferred criterion, separately for  
1300 different ring sizes. The criterion-inference model (green markers) well predicted the contributions of  
1301 stimuli (as indicated by different symbols) and inferred criteria (as indicated by different colored symbols)  
1302 to pL, which were confirmed statistically by the significant positive and negative (multiple) logistic  
1303 regressions of decisions onto ring size ( $Z_{(t)}$ ) and inferred criterion (onto  $\mu_p(c_{(t)})$ ), respectively, for each and  
1304 every auxiliary data set:  $\beta_{Z_{(t)}} = 1.36$  ( $P < 10^{-86}$ ),  $\beta_{\mu_p(c_{(t)})} = -0.54$  ( $P < 10^{-28}$ ) for AD#1 (A);  $\beta_{Z_{(t)}} = 1.47$   
1305 ( $P < 10^{-323}$ ),  $\beta_{\mu_p(c_{(t)})} = -0.25$  ( $P < 10^{-17}$ ) for AD#2 (B);  $\beta_{Z_{(t)}} = 1.44$  ( $P < 10^{-72}$ ),  $\beta_{\mu_p(c_{(t)})} = -0.35$   
1306 ( $P < 10^{-44}$ ) for AD#3 (C). As for AD#2, we did not plot the pL data for the largest two and the smallest two  
1307 stimuli, because only small numbers of trials were available for several observers due to the staircase  
1308 procedure applied to determine the stimulus sequence for AD#2.

1309 (D-F) RT plotted as a function of inferred criterion, separately for three different congruence conditions (as  
1310 specified by different symbols). 'X Cong./Incong.' in (F) refers to the congruence between current decision  
1311 and XL (extra large, 4.16°) or XS (extra small, 3.84°) sized rings for the data set AD#3 (see *Figure 4-figure*  
1312 *supplement 4A* for detailed specifications). As explained and stated in the main text (*Figure 5*), the  
1313 criterion-inference model predicts the negative and positive regressions of decision RT onto ring size ( $Z_{(t)}$ )  
1314 and inferred criterion ( $\mu_p(c_{(t)})$ ), respectively, for the 'large'-decision trials, whereas it predicts the positive  
1315 and negative regressions of decision RT onto ring size ( $Z_{(t)}$ ) and inferred criterion ( $\mu_p(c_{(t)})$ ), respectively, for  
1316 the 'small'-decision trials. When multiple linear regressions were carried out, these model predictions were  
1317 statistically supported by each and every auxiliary data set:  $\beta_{Z_{(t)}} = -0.21$  ( $P < 10^{-15}$ ) &  $\beta_{\mu_p(c_{(t)})} =$

1318 0.16 ( $P < 10^{-9}$ ) for 'large' decisions and  $\beta_{Z_{(t)}} = 0.28$  ( $P < 10^{-27}$ ) &  $\beta_{\mu_p(c_{(t)})} = -0.13$  ( $P < 10^{-5}$ ) for 'small'  
1319 decisions for for AD#1 (D).  $\beta_{Z_{(t)}} = -0.23$  ( $P < 10^{-49}$ ) &  $\beta_{\mu_p(c_{(t)})} = 0.085$  ( $P < 10^{-7}$ ) for 'large' decisions

1320 and  $\beta_{Z(t)} = 0.21$  ( $P < 10^{-41}$ ) &  $\beta_{\mu_{p(c(t))}} = -0.038$  ( $P = 0.013$ ) for ‘small’ decisions for AD#2 (E);  
1321  $\beta_{Z(t)} = -0.097$  ( $P < 10^{-6}$ ) &  $\beta_{\mu_{p(c(t))}} = 0.051$  ( $P < 10^{-6}$ ) for ‘large’ decisions and  $\beta_{Z(t)} = 0.12$  ( $P <$   
1322  $10^{-11}$ ) &  $\beta_{\mu_{p(c(t))}} = -0.058$  ( $P < 10^{-5}$ ) for ‘small’ decisions for AD#3 (F). Again, as for AD#2, we did not  
1323 plot the RT data for the largest two and the smallest three congruence conditions for the same reason in  
1324 the above.  
1325

1326

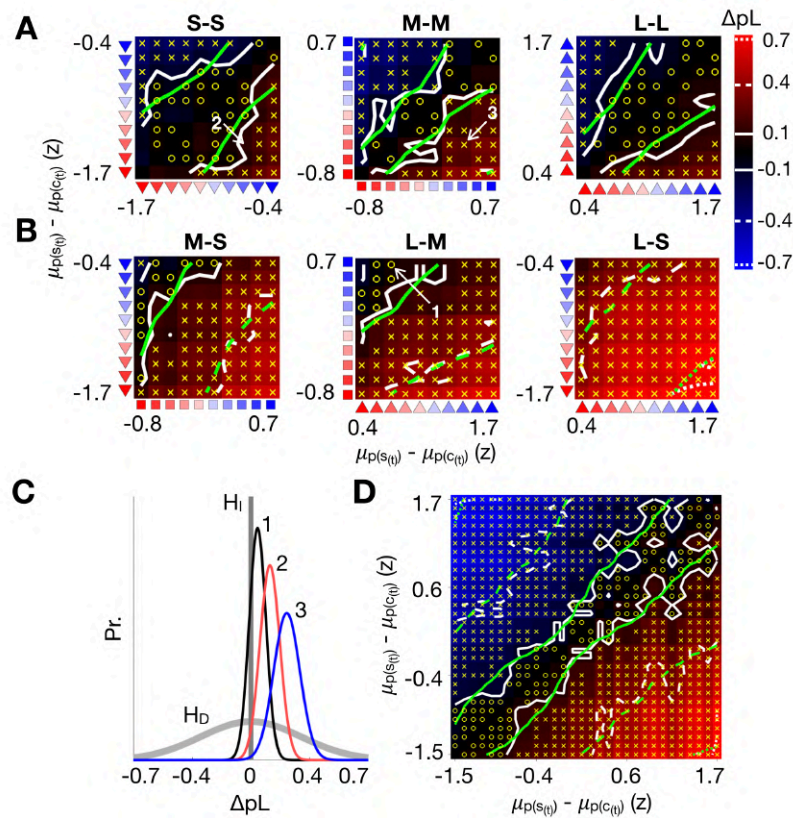

1327

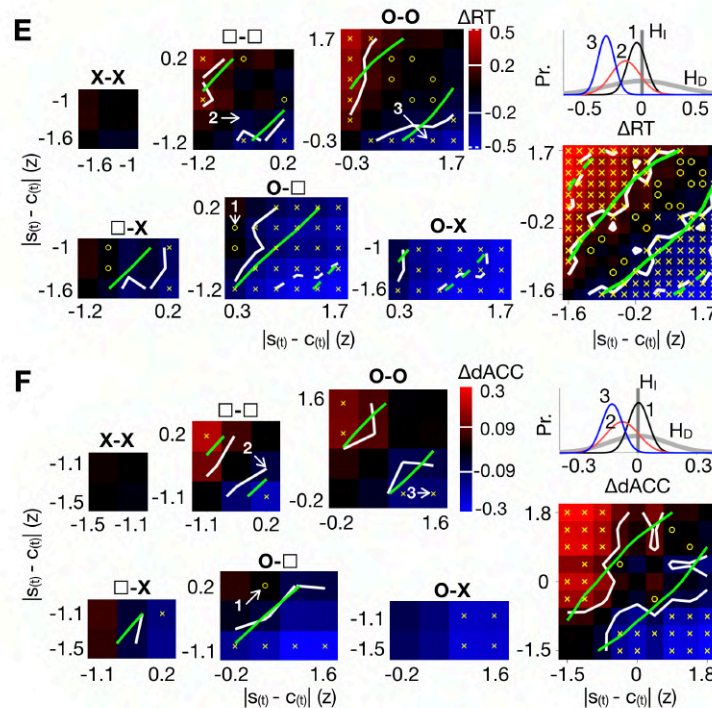

1328

1329

1330 **Figure 6-figure supplement 1.** Definitions and predictions of decision-probability (pL) metamers and anti-  
 1331 metamers by the criterion-inference model. According to the criterion-inference model, decisions on two  
 1332 different trials,  $i$  and  $j$ , become ‘metamers’—decisions on physically different stimuli that are indiscernible  
 1333 both in decision probability ( $pL_{(i)} \approx pL_{(j)} | Z_{(i)} \neq Z_{(j)}$ ) and decision uncertainty ( $u_{(i)} \approx u_{(j)} | Z_{(i)} \neq Z_{(j)}$ ),  
 1334 provided that their difference in inferred stimulus is sufficiently counteracted by the same amount of  
 1335 difference in inferred criterion ( $[s_{(i)} - s_{(j)}] - [c_{(i)} - c_{(j)}] \approx 0$ ). By the same token, as long as the difference  
 1336 of inferred criterion between two decisions is large enough to go sufficiently beyond their difference of

1337 inferred stimulus ( $[s_{(i)} - s_{(j)}] - [c_{(i)} - c_{(j)}] \neq 0$ ), two decisions become ‘anti-metamers’—decisions on  
 1338 physically identical stimuli that are discernible in decision probability ( $pL_{(i)} \neq pL_{(j)} | Z_{(i)} = Z_{(j)}$ ) or decision  
 1339 uncertainty ( $u_{(i)} \neq u_{(j)} | Z_{(i)} = Z_{(j)}$ ). These definitions of decision metamers and anti-metamers are  
 1340 falsifiable because our model specifies each and every trial by a set of expected values of  
 1341  $\{s_{(t)}, c_{(t)}, pL_{(t)}, u_{(t)}\}$ . Specifically, the set of expected values allows us to deterministically predict the  
 1342 metameric currency for each pair of trials,  $[s_{(i)} - s_{(j)}] - [c_{(i)} - c_{(j)}] = [s_{(i)} - c_{(i)}] - [s_{(j)} - c_{(j)}]$ , by which we  
 1343 derive when the trials in each pair differ or similar in decision probability ( $\Delta pL_{(i,j)} = pL_{(i)} - pL_{(j)}$ ) and  
 1344 decision uncertainty ( $\Delta u_{(i,j)} = u_{(i)} - u_{(j)}$ ). To statistically verify this ‘metamer-to-anti-metamer’ mapping for  
 1345 the case of  $\Delta pL_{(i,j)}$ , we proceeded as follows. First, as shown in **Figure 6D**, we grouped individual trials  
 1346 according to physical ring sizes (left, middle, and right panels for S, M, and L rings, respectively), and sorted  
 1347 the trials within each stimulus group by  $s_{(t)} - c_{(t)}$  into 10 equal-sized bins (as indicated by 10 markers in  
 1348 each panel). The symbols and colors represent the physical ring size and the mean of inferred criteria,  
 1349 respectively. Second, we made all possible (100) pairs of bins for each stimulus group, as shown in the 2D  
 1350 matrix format in **(A)**, resulting in a total of 300 within-stimulus bin pairs. Third, we also made all possible  
 1351 (100) pairs of bins for each of the three pairs of stimulus groups resulting in a total of 600 between-  
 1352 stimulus bin pairs, as shown separately in three panels of **(B)** (left, S subtracted from M; middle, L  
 1353 subtracted from M; right, S subtracted from L; the opposite subtractions were not shown because the only  
 1354 difference is sign). Fourth, to judge whether the observed  $\Delta pL_{(i,j)}$  at each of the bin pairs (a total of 900  
 1355 pairs) is significantly “equal to zero ( $H_1: \Delta pL_{(i,j)} = 0$ )” or “not equal to zero ( $H_D: \Delta pL_{(i,j)} \neq 0$ ), we  
 1356 computed the Bayes factor  $B$  (*Dienes, 2008, 2014; Good, 1979; Jeffreys, 1961; Kass and Raftery, 1995; Wod, 1985*)  
 1357 by taking the ratio of the marginal likelihoods of two competing hypotheses,  $H_1$  (“Indiscernible”) and  
 1358  $H_D$  (“Discernible”):  $B_{(i,j)} \equiv \frac{p(\Delta pL_{(i,j)} | H_D)}{p(\Delta pL_{(i,j)} | H_1)}$ , which is equivalent with the ratio of the posterior probabilities of  
 1359 two hypotheses  $\frac{p(H_D | \Delta pL_{(i,j)})}{p(H_1 | \Delta pL_{(i,j)})}$ , because we did not have a bias to one of the hypotheses ( $p(H_D) = p(H_1)$ ).  
 1360 Unlike the conventional significance test, the Bayes factor takes into account the posterior probabilities of  
 1361 competing hypotheses and tell us whether the observed data is likely to support the null hypothesis ( $H_1$  for  
 1362 Bayes factor  $< 1/3$ ), the alternative hypothesis ( $H_D$  for Bayes factor  $> 3$ ), or neither (for  $1/3 < \text{Bayes factor} < 3$ )  
 1363 (*Jeffreys, 1961*). The Bayes factor was calculated using a free online Bayes factor calculator (*Dienes, 2008*)  
 1364 ([http://www.lifesci.sussex.ac.uk/home/Zoltan\\_Dienes/inference/bayes\\_factor.swf](http://www.lifesci.sussex.ac.uk/home/Zoltan_Dienes/inference/bayes_factor.swf)) by assuming the two  
 1365 prior distributions of  $H_1$  ( $p(\Delta pL | H_1)$ ) and  $H_D$  ( $p(\Delta pL | H_D)$ ), respectively.  $p(\Delta pL | H_1)$  supports only a single  
 1366 value at zero ( $\Delta pL = 0$ ), which means  $H_1$  is Dirac delta function. On the other hand,  $p(\Delta pL | H_D)$  was  
 1367 assumed to have normal distribution with a mean of zero and an SD identical to the SD of the distribution  
 1368 of non-zero  $\Delta pL_{(i,j)}$  (870 pairs), as indicated by the gray curve in **c**. Next, we defined the likelihood  
 1369  $p(\Delta pL_{(i,j)} | \Delta pL)$  given the observed data  $\{\Delta pL_{(i,j)}^1, \Delta pL_{(i,j)}^2, \dots, \Delta pL_{(i,j)}^N\}$ , where  $N = 18$  (number of observers),  
 1370 for each of the entire (900) cells by taking the mean of the observed data and its standard error. Example  
 1371 likelihood distributions (the colored curves in **C**) for the three bin pairs are overlaid on the prior distribution,  
 1372 whereby the number labels indicate for which cells in A and B the likelihoods were defined. These  
 1373 likelihood distributions were combined with the prior to define the marginal likelihoods, as follows:  
 1374  $p(\Delta pL_{(i,j)} | H_D) = \int_{-1}^1 p(\Delta pL_{(i,j)} | \Delta pL) p(\Delta pL | H_D) d\Delta pL$  and  
 1375  $p(\Delta pL_{(i,j)} | H_1) = \int_{-1}^1 p(\Delta pL_{(i,j)} | \Delta pL) p(\Delta pL | H_1) d\Delta pL = p(\Delta pL_{(i,j)} | 0)$ , which is the intercept of  $p(\Delta pL_{(i,j)} | \Delta pL)$ .  
 1376 The integration of the second part of the above equation was solved using the definition of Dirac delta  
 1377 function. Next, the Bayes factors were defined by taking the ratio of the marginal likelihoods. For the case  
 1378 “1” (black), although different stimuli (‘S’ ring and ‘M’ ring) were presented between these paired trials,  
 1379 the Bayes factor (0.2) was smaller than  $1/3$  and thus favors  $H_1$  (“Indiscernible”). Hence, this case  
 1380 demonstrates the presence of a pair of “decision metamers” (indiscernible decisions on different stimuli).  
 1381 By contrast, the case “3” (blue) has the Bayes factor of 8.4, which is greater than 3 and thus favors  $H_D$   
 1382 (“Discernible”), although an identical ring size (M) was presented between these paired trials. Hence, this  
 1383 case demonstrates the presence of a pair of “decision anti-metamers” (discernible decisions on identical  
 1384 stimuli). The case “2” (red), whereby the Bayes factor had an intermediate value (1.1), illustrates a case in  
 1385 which neither hypotheses is supported. The entire Bayesian judgments of which hypothesis,  $H_1$  or  $H_D$ , wins  
 1386 in local bin pairs are marked by ‘O’ or ‘X’, respectively, in **(A)** and **(B)**. We omitted the test for the bins with  
 1387  $\Delta pL_{(i,j)} = 0$ , because it entails the indiscernibility. Note that decision metamers are indicated by ‘O’ in the  
 1388 between-stimulus pairs **(B)** and decision anti-metamers indicated by ‘X’ in the within-stimulus pairs **(A)**.  
 1389 When the all bin pairs, whether they were within-stimulus or between-stimulus pairs, were put together in

1390 a single, unified matrix (**D**), regardless of the stimulus size, we can clearly see that the relative value of  
1391 stimulus estimate to criterion estimate ( $\mu_{p(s_{(t)})} - \mu_{p(c_{(t)})}$ ) modulates the degree of difference in pL  
1392 between trials. Here, the color intensity in each cell of the matrix corresponds to the difference in decision  
1393 probability for each bin pair ( $\Delta pL_{(i,j)}$ ), whereby the color is black when  $\Delta pL_{(i,j)} = 0$  and become increasingly  
1394 saturated into blue and red as  $\Delta pL_{(i,j)}$  takes increasingly more negative and positive values, respectively. To  
1395 help appreciate the correspondences between the Bayes factor outcomes and the model prediction, the  
1396 observed and the Bayesian iso- $\Delta pL_{(i,j)}$  contours are overlaid with white and green, respectively, in A, B, and  
1397 D. Solid, dashed, and dotted contours demarcate  $\Delta pL$  of  $\pm 0.1$ ,  $\pm 0.4$ , and  $\pm 0.7$ , respectively. In sum, the  
1398 results of the Bayes factor analysis show that our criterion-inference model offers accurate definitions of  
1399 decision metamers and anti-metamers by mapping the estimates of  $s_{(t)}$  and  $c_{(t)}$  to  $pL_{(t)}$  on a trial-to-trial  
1400 basis. The almost identical analyses were applied to the RT and dACC data to demonstrate that the model  
1401 also successfully specifies the metamers and anti-metamers defined in terms of decision uncertainty ( $u_{(t)}$ ).  
1402 For  $u_{(t)}$ , the metameric currency is defined in an absolute term,  $|s_{(t)} - c_{(t)}|$ . (**E, F**) The format is identical to  
1403 that of A-D. As for decision uncertainty ( $u$ ), two decisions become metamers in RT and dACC when they  
1404 have sufficiently similar values of  $|s_{(t)} - c_{(t)}|$  (instead of  $\mu_{p(s_{(t)})} - \mu_{p(c_{(t)})}$ ) despite their difference in  
1405 stimulus-decision congruency ( $u_{(i)} = u_{(j)} | \text{Cong}_{(i)} \neq \text{Cong}_{(j)}$ ); marked by 'O' in the panels labeled with ' $\square$ -X',  
1406 'O- $\square$ ' and 'O-X' in E for RT data and F for dACC data) or anti-metamers in RT and dACC when they have  
1407 sufficiently different values of  $|s_{(t)} - c_{(t)}|$ , despite their similarity in stimulus-decision congruency  
1408 ( $u_{(i)} \neq u_{(j)} | \text{Cong}_{(i)} = \text{Cong}_{(j)}$ ); marked by 'X' in the panels labeled with 'X-X', ' $\square$ - $\square$ ' and 'O-O' in E and F). X,  
1409 trials on which stimulus and decision are incongruent;  $\square$ , on which M ring is presented; O, trials on which  
1410 stimulus and decision are congruent. As in (C), the priors (gray curve and line) and likelihood (colored  
1411 curves) distributions of differences in RT and dACC are shown for three example cases of RT/dACC  
1412 metamers ("1") and anti-metamers ("3").  
1413

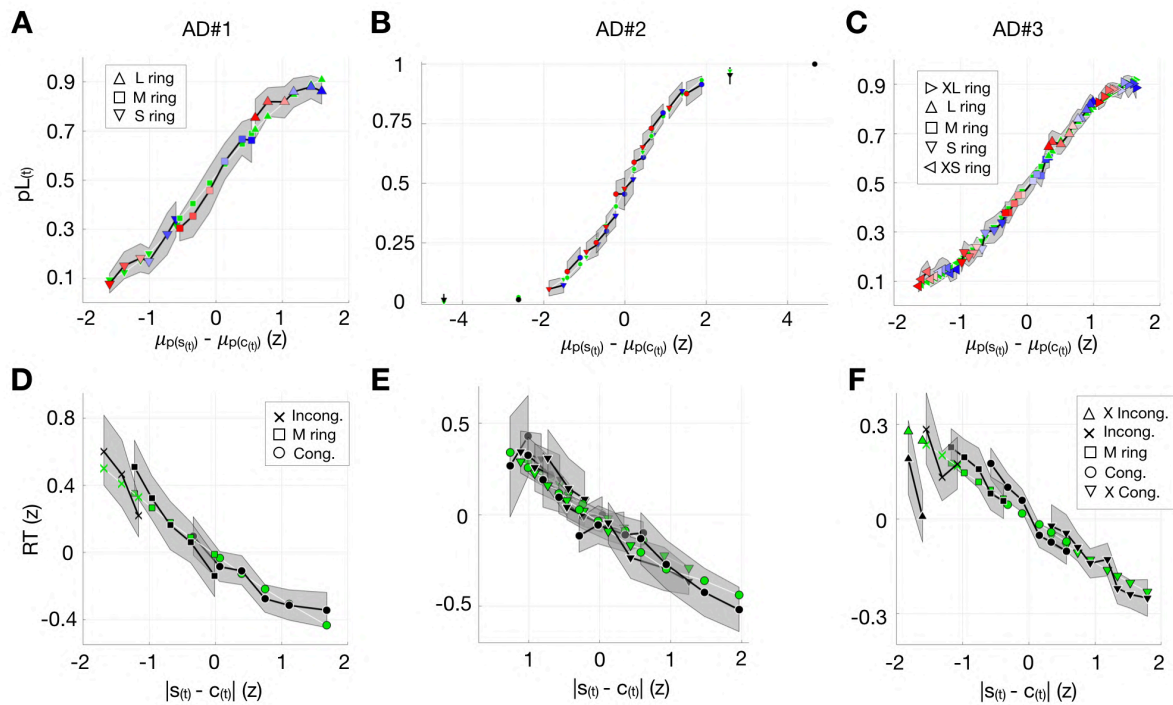

1414  
1415  
1416  
1417  
1418  
1419  
1420  
1421  
1422  
1423  
1424  
1425  
1426  
1427  
1428  
1429  
1430  
1431

**Figure 6-figure supplement 2:** Verifying the model's ability to account for the relativity of classification with different sets of stimuli, feedback types, and inter-trial-interval lengths.

(A-C) Juxtaposition of the observed proportions of 'large' responses ( $p_L$ ; markers in a blue-to-red spectrum) and the criterion-inference model predictions of  $p_L$ s based on simulation (green markers).  $p_L$ s are plotted against the binned deviations of ring-size estimates from inferred criterion estimates for each stimulus condition. As for the markers in blue-to-red spectrum, color shifts from blue to red as the inferred criterion ( $\mu_p(c_{(t)})$ ) increases. Each symbol indicates different stimulus.

(D-F) Juxtaposition of the observed RT (black symbols) and the criterion-inference model predictions of decision-uncertainty based on simulation (green markers). RTs are plotted against the binned absolute difference between the stimulus and criterion estimates, separately for different stimulus-decision congruence conditions (as indicated by different symbols).

(A-F) Gray patches represent 95% bootstrap confidence interval. Just as in the main data (Figure 6), the predictions of the criterion-inference model fell well within the confidence intervals of the observed data at the majority of data bins for each and every auxiliary data set. As for AD#2, we did not plot the  $p_L$  data for the largest two and the smallest two stimuli and did not plot the RT data for the largest two and the smallest three congruence conditions, because only small numbers of trials were available for several observers due to the staircase procedure applied to determine the stimulus sequence for AD#2.



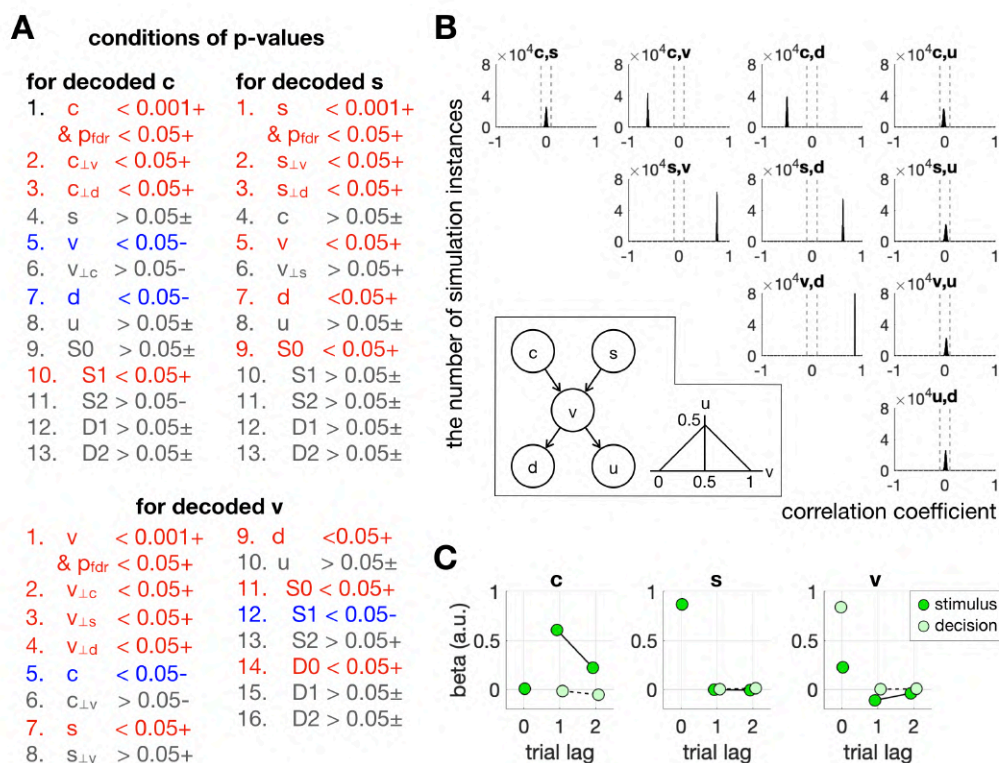

1432  
1433

1434 **Figure 7-figure supplement 1.** Deduction of the regressions for  $c_{(t)}$ ,  $s_{(t)}$ , and  $v_{(t)}$  from the causal structure  
 1435 of manipulated (stimuli), observed (decisions), and latent model variables ( $c$ ,  $s$ ,  $v$ ,  $u$ , and  $d$ ). **(A)** Lists of  
 1436 regressions to be satisfied for  $c_{(t)}$ ,  $s_{(t)}$ , and  $v_{(t)}$ . To identify brain signals of  $c_{(t)}$ ,  $s_{(t)}$ , and  $v_{(t)}$ , we defined  
 1437 three a priori lists of regressions onto the manipulated (past and current stimuli), observed (past and  
 1438 current decisions), and latent model variables (inferred criterion, inferred stimulus, decision variable,  
 1439 decision uncertainty, and decision identity) that must be satisfied, respectively, by the brain signals. We  
 1440 stress that each of these lists (1) is a “collectively exhaustive” set, because the constituent regressions  
 1441 encompass all the variables at work in the model as regressors, and (2) consist of “the necessary  
 1442 conditions to be satisfied, and the conditions that must not be satisfied as well”, because both significant  
 1443 ( $\beta > 0$  or  $\beta < 0$ ) and non-significant ( $\beta = 0$ ) regressions are deduced from the causal structure of variables  
 1444 that are defined by the criterion-inference model (see **Figure 7B**). Thus, these lists subject the candidate  
 1445 brain signals of the latent variables to strong tests, and, if a given brain signal satisfies the entire list of  
 1446 regressions, it must be considered, as one that may be not a mere “neural correlate or signature” of a  
 1447 latent variable, but rather a “neural representation or embodiment” of a latent variable. The meanings of  
 1448 symbols, numbers, and colors used in expressing the regressions are as follows: ‘+’, ‘-’, and ‘±’, signs of  
 1449 regression indicating that the tail of significance test is right, left, or two-tailed, respectively; numbers with  
 1450 decimal points, threshold p-values for GLMM regression of a brain signal onto the variable of interest ( $P_{\text{FDR}}$ ,  
 1451 FDR-corrected p-values); ‘<’ and ‘>’, significant and non-significant regression; ‘ $A_{\perp B}$ ’, residual from linear  
 1452 regression of A onto B (which will be referred to as ‘A orthogonalized to B’ from now on); ‘ $D\#$ ’ and ‘ $S\#$ ’,  
 1453 decision and stimulus on a #-back trial; red, blue, and gray, positive, negative, and non-significant  
 1454 regressions, respectively. The brain signals of a targeted variable must and must not satisfy the following  
 1455 regressions of the targeted variable:

1456 **The brain signal of  $c$  ( $y_c$ ; top left column of A).** ( $c_1$ )–( $c_3$ ),  $y_c$  must be regressed onto  $c$ —the  
 1457 variable it represents—even when  $c$  is orthogonalized to  $v$  or  $d$ , because it should reflect the variance  
 1458 irreducible to the offspring variables of  $c$ ; ( $c_4$ ),  $y_c$  must not be regressed onto  $s$  because  $c$  and  $s$  are  
 1459 independent; ( $c_5$ ), ( $c_6$ ),  $y_c$  must be regressed onto  $v$  but not when  $v$  is orthogonalized to  $c$  because the  
 1460 influence of  $c$  on  $v$  is removed; ( $c_7$ ), ( $c_8$ )  $y_c$  must be regressed onto  $d$  but not onto  $u$  because  $u$ ’s  
 1461 relationship with its parents  $v$  and  $c$  is nonlinear (see **Figure 7E**); ( $c_9$ )–( $c_{11}$ ),  $y_c$  must be regressed onto, not  
 1462 the current stimulus, but the past stimuli—strongly onto the 1-back stimulus and more weakly onto the 2-  
 1463 back stimulus (thus, non-significant regression with one-tailed regression in the opposite sign is modeled

1464 conservatively);  $(c_{12}), (c_{13}), y_c$  must not be regressed onto previous decisions at all because  $c$  is inferred  
1465 solely from retrieved stimulus measurements.

1466 **The brain signal of  $s$  ( $y_s$ ; top right column of A).**  $(s_1)-(s_3), y_s$  must be regressed onto  $s$ —the  
1467 variable it represents per se—even when  $s$  is orthogonalized to  $v$  or  $d$  because it should reflect the  
1468 variance irreducible to the offspring variables of  $s$ ;  $(s_4), y_s$  must not be regressed onto  $c$  because  $s$  and  $c$   
1469 are independent of each other;  $(s_5), (s_6), y_s$  must be regressed onto  $v$  but not when  $v$  is orthogonalized to  
1470  $s$  because the influence of  $s$  on  $v$  is removed;  $(s_7), (s_8), y_s$  must be regressed onto  $d$  but not onto  $u$  because  
1471  $u$ 's relationship with its parents  $v$  and  $s$  is nonlinear (see **Figure 7E**);  $(s_9)-(s_{11}), y_s$  must be regressed onto  
1472 the current stimuli and not the past stimuli because  $s$  is inferred solely from the current stimulus  
1473 measurement;  $(s_{12}), (s_{13}), y_s$  must not be regressed onto previous decisions because  $s$  is inferred solely  
1474 from the current stimulus measurement.

1475 **The brain signal of  $v$  ( $y_v$ ; bottom columns of A).**  $(v_1)-(v_4), y_v$  must be regressed onto  $v$ —the  
1476 variable it represents—even when  $v$  is orthogonalized to  $c, s$ , or  $d$ , because it should reflect the variance  
1477 irreducible to the offspring variables of  $s$ ;  $(v_5), (v_6), y_v$  must be regressed onto one of its parents  $c$ , but not  
1478 when  $c$  is orthogonalized to  $v$ , because the influence of  $c$  on  $v$  is removed;  $(v_7), (v_8), y_v$  must be regressed  
1479 onto one of another parent  $s$ , but not when  $s$  is orthogonalized to  $v$ , because the influence of  $s$  on  $v$  is  
1480 removed;  $(v_9), (v_{10}), y_v$  must be regressed onto  $d$  but not onto  $u$  because  $u$ 's relationship with its parent  $v$   
1481 is nonlinear (see **Figure 7E**);  $(v_{11})-(v_{13}), y_v$  must be positively regressed onto the current stimulus because  
1482 the influence of the current stimulus on  $v$  is propagated via  $s$ , and negatively regressed onto the past  
1483 stimuli because the influence of the past stimuli on  $v$  is propagated via  $c$ —strongly onto the 1-back  
1484 stimulus and more weakly onto the 2-back stimulus (thus, non-significant regression with one-tailed  
1485 regression in the opposite sign is modeled moderately);  $(v_{14})-(v_{16}), y_v$  must be regressed onto the current  
1486 decision and not the past decisions because the current decision is a dichotomous translation of  $v$ , whereas  
1487 past decisions have nothing to do with the current state of  $v$ .

1488 **(B) Pairwise correlations between the simulated latent variables.** To confirm the above regressions  
1489 onto all latent variables except for themselves ( $(c_4)-(c_8)$  for  $y_c$ ;  $(s_4)-(s_8)$  for  $y_s$ ;  $(v_5)-(v_{10})$  for  $y_v$ ), we  
1490 calculated the pairwise correlations between those variables from the simulated data as follows. First, we  
1491 fitted the model to the corresponding human observers' decision behaviors and created the 18 Bayesian  
1492 observers, each inheriting the fitted model parameters of their human partner. Second, we asked these 18  
1493 Bayesian observers to repeatedly ( $10^6$  times) carry out the task on the same sequences of stimuli that were  
1494 presented to their human partners, respectively, so that we could acquire a large, simulated time series of  
1495 trial-to-trial values of the latent variables,  $c_{(t)}, s_{(t)}, v_{(t)}, d_{(t)}$ , and  $u_{(t)}$ . Finally, we calculated the Pearson's  
1496 correlations between those variables for individual simulations, resulting in  $10^6$  coefficients for each of all  
1497 possible (10) pairs of variables. The results are shown in a histogram, with one panel for each pair. Bilateral  
1498 black dashed lines indicate  $\pm 0.1$  Pearson correlation coefficients around zero. The distributions of  
1499 simulated variable values were consistent with the regressions deduced from the causal structure in the  
1500 model, as follows: ' $r(c, s) = 0.0023$  (median)' is consistent with the regressions of  $(c_4)$  and  $(s_4)$ ; ' $r(c, v) =$   
1501  $-0.62$ ' with the regressions of  $(c_5), (c_6), (v_5)$ , and  $(v_6)$ ; ' $r(c, d) = 0.50$ ' with the regressions of  $(c_7)$ ;  
1502 ' $r(c, u) = 0.022$ ' with the regressions of  $(c_8)$ ; ' $r(s, v) = 0.75$ ' with the regressions of  $(s_5), (s_6), (v_7)$ , and  
1503  $(v_8)$ ; ' $r(s, d) = 0.62$ ' with the regressions of  $(s_7)$ ; ' $r(s, u) = 0.019$ ' with the regressions of  $(s_8)$ ; ' $r(v, d) =$   
1504  $0.85$ ' with the regressions of  $(v_9)$ ; ' $r(v, u) = 0.027$ ' with the regressions of  $(v_{10})$ . To demonstrate how the  
1505 regressions are deduced and related to the correlations, the causal graph and the nonlinear causal function  
1506 from  $v$  to  $u$  are shown in the bottom left-hand corner.

1507 **(C) Multiple logistic regressions of  $c_{(t)}, s_{(t)}$ , and  $v_{(t)}$  onto stimuli and decisions.** To confirm the  
1508 regressions onto the manipulated (stimuli) and observed (decisions) variables ( $(c_9)-(c_{13})$  for  $y_c$ ;  $(s_9)-(s_{13})$   
1509 for  $y_s$ ;  $(v_{11})-(v_{16})$  for  $y_v$ ), we carried out multiple logistic regressions of  $c_{(t)}, s_{(t)}$ , and  $v_{(t)}$  onto the stimuli  
1510 presented to and (simulated) decisions made by the Bayesian observers. The patterns of regression  
1511 coefficients were consistent with the regressions deduced from the causal structure in the model, as  
1512 follows: left panel was consistent with  $(c_9)-(c_{13})$ ; middle panel was consistent with  $(s_9)-(s_{13})$ ; right panel  
1513 was consistent with  $(v_{11})-(v_{16})$ .

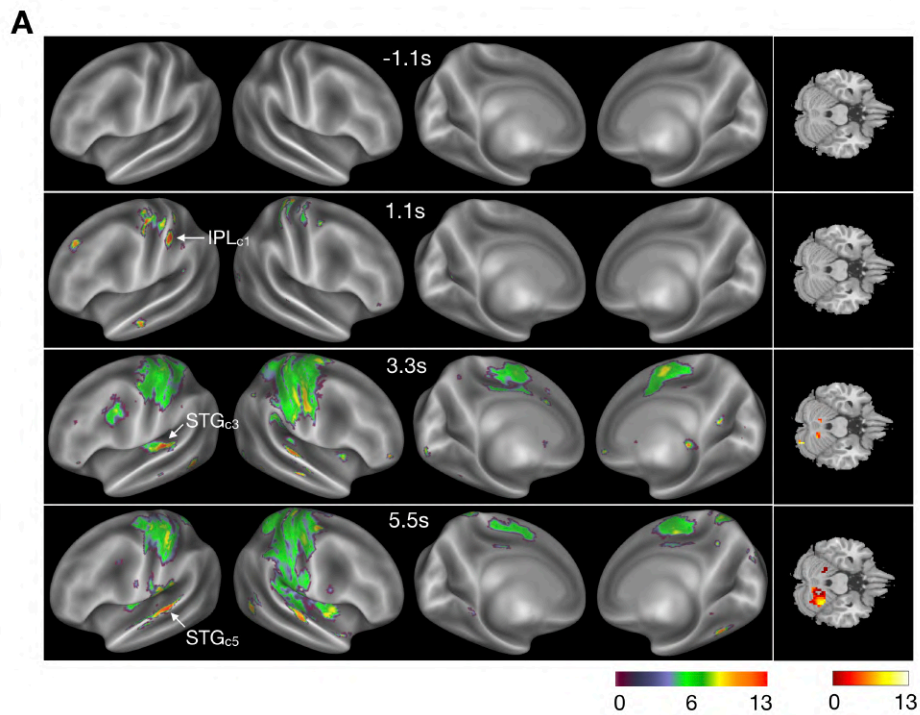

1514  
1515  
1516

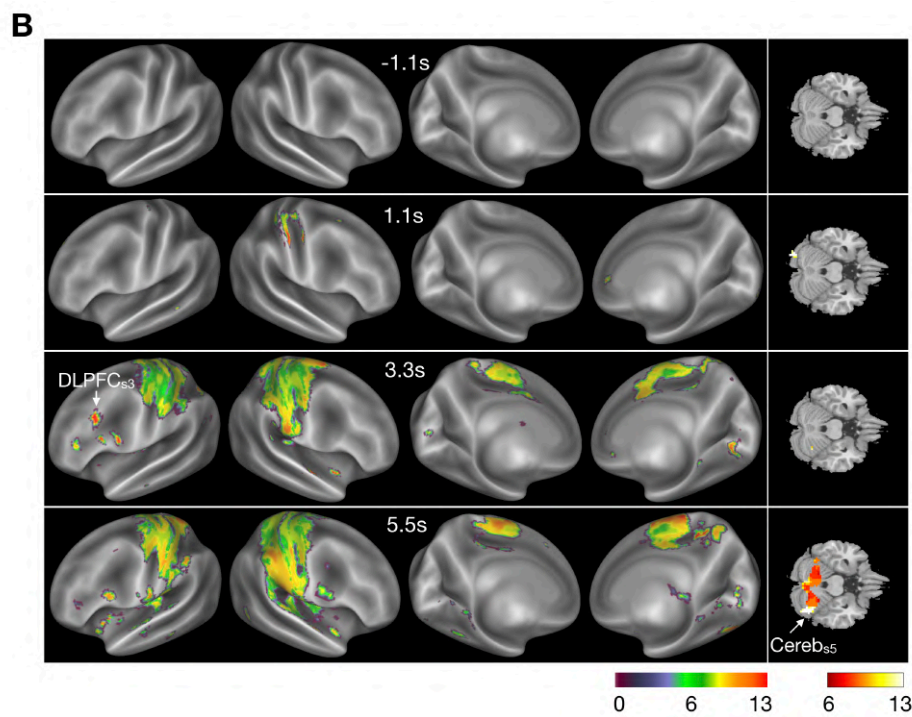

1517  
1518

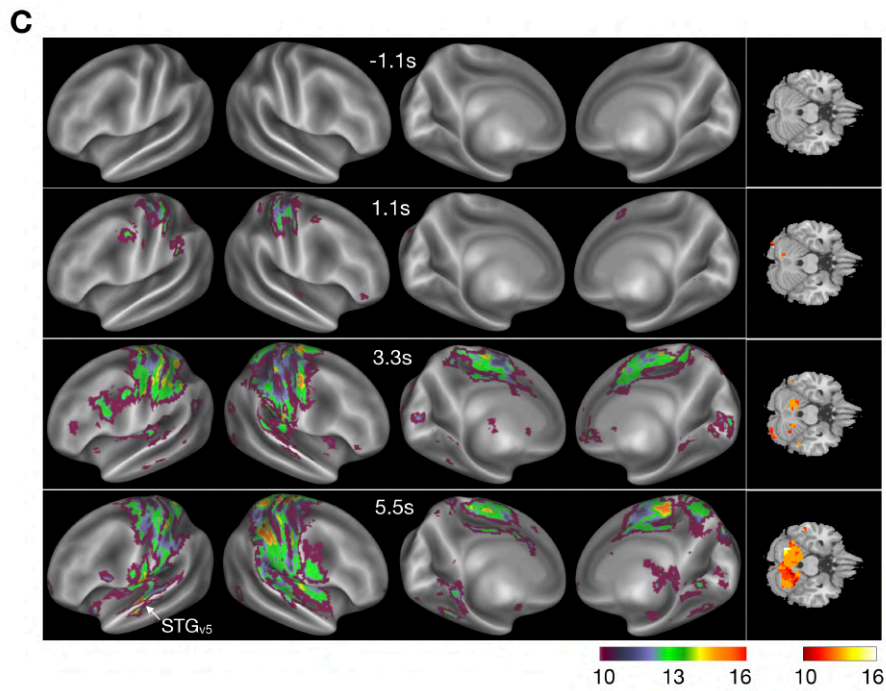

1519  
1520  
1521  
1522  
1523  
1524  
1525  
1526

**Figure 7-figure supplement 2.** Maps of the numbers of regression tests satisfied for the latent variables in the model ( $s$ ,  $c$ , and  $v$ ). (**A-C**), Each row represents the decoded information of  $c_{(t)}$  (**A**),  $s_{(t)}$  (**B**), and  $v_{(t)}$  (**C**) at a specific time point relative to stimulus onset. The color hue represents how many of the regression tests (see *Figure 7-figure supplement 1* for complete definitions) were satisfied by the candidate brain signals of the latent model variables. The score maps in NIfTI format are available in Github (see Methods: Data and code availability).

**A**

| cortical area                       | embodied information | informative time point (s) | contiguous searchlight centers (N) | peak searchlight |                                                       |
|-------------------------------------|----------------------|----------------------------|------------------------------------|------------------|-------------------------------------------------------|
|                                     |                      |                            |                                    | MNI coordinate   | GLMM p-value of $c_{(t)}$ (or $s_{(t)}$ , $v_{(t)}$ ) |
| left inferior parietal lobe         | $c_{(t)}$            | 1.1                        | 15                                 | [-54, -27, 48]   | $8.8 \times 10^{-8}$                                  |
| left superior temporal gyrus        | $c_{(t)}$            | 3.3                        | 13                                 | [-45, -30, 9]    | $5.8 \times 10^{-7}$                                  |
| left superior temporal gyrus        | $c_{(t)}$            | 5.5                        | 18                                 | [-66, -21, 9]    | $2.3 \times 10^{-7}$                                  |
| left dorsolateral prefrontal cortex | $s_{(t)}$            | 3.3                        | 33                                 | [-51, 27, 24]    | $1.9 \times 10^{-7}$                                  |
| right cerebellum                    | $s_{(t)}$            | 5.5                        | 36                                 | [36, -63, -21]   | $1.4 \times 10^{-6}$                                  |
| left superior temporal gyrus        | $v_{(t)}$            | 5.5                        | 15                                 | [-60, -9, 12]    | $4.9 \times 10^{-8}$                                  |

**B**

| cortical area                 | embodied information | informative time point (s) | contiguous searchlight centers (N) | peak searchlight |                                                       |
|-------------------------------|----------------------|----------------------------|------------------------------------|------------------|-------------------------------------------------------|
|                               |                      |                            |                                    | MNI coordinate   | GLMM p-value of $c_{(t)}$ (or $s_{(t)}$ , $v_{(t)}$ ) |
| right inferior temporal gyrus | $c_{(t)}$            | 3.3                        | 11                                 | [57, -60, -15]   | $9.8 \times 10^{-6}$                                  |
| right cerebellum              | $s_{(t)}$            | 3.3                        | 10                                 | [6, -81, -18]    | $1.7 \times 10^{-5}$                                  |
| right superior temporal gyrus | $s_{(t)}$            | 3.3                        | 12                                 | [54, 0, -3]      | $1.0 \times 10^{-4}$                                  |
| left inferior parietal lobe   | $s_{(t)}$            | 3.3                        | 10                                 | [-30, -60, 36]   | $5.0 \times 10^{-5}$                                  |
| right precuneus               | $s_{(t)}$            | 5.5                        | 12                                 | [15, -45, 45]    | $6.0 \times 10^{-7}$                                  |

1527  
1528  
1529  
1530  
1531  
1532  
1533  
1534  
1535  
1536  
1537  
1538

**Figure 7-figure supplement 3.** Specifications of the ROIs in which activity was informative of the latent variables in the model ( $s$ ,  $c$ , and  $v$ ). By subjecting the candidate correlates of  $c_{(t)}$ ,  $s_{(t)}$  and  $v_{(t)}$ , which were detected by the whole-brain search using the MVPA technique (see Methods: Searching for multivoxel patterns of activity signaling latent model variables), to the exhaustive sets of necessary regression tests for the model's latent variables (see *Figure 7-figure supplement 1* for complete definitions), we identified three, two, and one clustered regions in which the brain signals of  $c_{(t)}$ ,  $s_{(t)}$ , and  $v_{(t)}$ , respectively, were embodied. The GLMM significances were calculated by one-tailed tests. **(A)** ROIs defined with the procedure in which the threshold for the number of contiguous searchlights satisfying all the regression tests was set to 13. **(B)** ROIs defined with the procedure in which a more relaxed threshold (the number of contiguous searchlights is more than 9) was used.

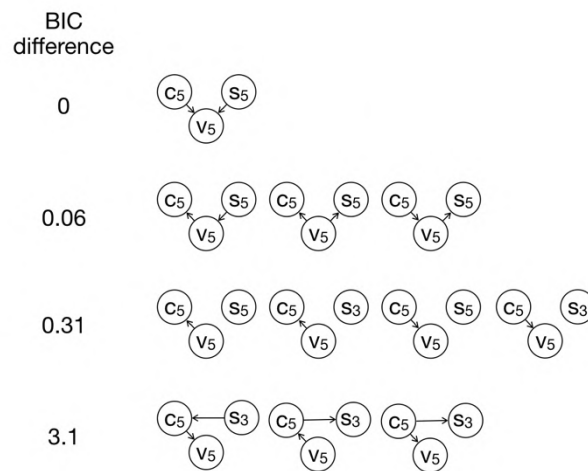

1539

1540

1541

1542

1543

1544

1545

1546

1547

1548

1549

1550

1551

1552

1553

1554

1555

1556

1557

1558

1559

1560

1561

1562

1563

1564

1565

1566

1567

1568

1569

1570

1571

1572

1573

1574

1575

1576

1577

1578

1579

1580

**Figure 7-figure supplement 4.** Correspondence between the causal graph of the latent variables that is prescribed *a priori* by the model ( $c \rightarrow v \leftarrow s$ ) and the *maximum likelihood* causal graph that is inferred from the brain signals representing those variables. To see whether the patterns of  $c$ ,  $s$  and  $v$  signals that were decoded in the brain regions (IPL<sub>c1</sub>, STG<sub>c3</sub>, STG<sub>c5</sub>, DLPFC<sub>s3</sub>, Cereb<sub>s5</sub>, STG<sub>v5</sub>; **Figure 7A-F**; **Figure 7-figure supplement 1, 2, 3**) are consistent with the causal graph structure that is prescribed *a priori* by the model, we searched for the causal graph ( $G$ ) whose likelihood is maximal given the time series of three brain signals, one for each of the latent variables ( $\{\bar{X}_c, \bar{X}_s, \bar{X}_v\}$ ):  $\text{argmax } p(G|\{c, s, v\} = \{\bar{X}_c, \bar{X}_s, \bar{X}_v\})$ . A total of 27 causal graphs can be created out of three variables ( $3 \times 3 \times 3$ ); a total of 6 triplets of brain signals can be used for  $\{\bar{X}_c, \bar{X}_s, \bar{X}_v\}$  since we have three (IPL<sub>c1</sub>, STG<sub>c3</sub>, STG<sub>c5</sub>), two (DLPFC<sub>s3</sub>, Cereb<sub>s5</sub>), and single (STG<sub>v5</sub>) candidate brain signals for  $c$ ,  $s$ , and  $v$ , respectively ( $3 \times 2 \times 1$ ). Thus, we could evaluate which of the 27 states of  $G$ (raph) is most likely for each of the 6 triplets of brain signals. Since the 27 graph states differ in complexity, i.e., the number of parameters, we used Bayesian Information Criterion (BIC) values for evaluation (the smaller a BIC value is, the more likely a graph is). The outcomes of BIC evaluation were consistent with our model of  $c$  inference in the following two aspects.

First, out of the 162 possible pairs of possible causal graph structures and possible triplets of brain signals ( $162 = 27$  graph structures  $\times$  6 triplets of brain signals), the smallest BIC value was found for the pair of the graph structure ' $c \rightarrow v \leftarrow s$ ' and the triplet of brain signals  $\{\bar{X}_c = \text{STG}_{c5}, \bar{X}_s = \text{Cereb}_{s5}, \bar{X}_v = \text{STG}_{v5}\}$ . This causal graph of 'common effect' is exactly the one prescribed by the model. Note that, given any correlation data, the graph of 'common effect' is distinguishable from the graphs of 'chain' and 'common cause', which are indistinguishable from one another by contrast, because the 'common effect' graph is Markov-equivalent neither with the 'chain' graph nor with the 'common cause' graph whereas the 'chain' graph and the 'common cause' graph are Markov equivalent. Note also that the winner graph, ' $c \rightarrow v \leftarrow s$ ', is not Markov-equivalent with neither of the other possible 'common effect' graph structures, ' $v \rightarrow c \leftarrow s$ ' and ' $c \rightarrow s \leftarrow v$ '. For that matter, ' $c \rightarrow v \leftarrow s$ ' is unique in terms of Markov equivalence, being distinguishable from the entire rest of the possible (26) graphs. This is why ' $c \rightarrow v \leftarrow s$ ' can stand out alone as the most likely causal graph given the evidence of brain signals.

Second, note that there exists one critical condition that can falsify our model: the 'significant' existence of any graph that includes causal arrows between  $c$  and  $s$ . This is so because our model is built upon the assumption that  $c$  and  $s$  are the random variables that are independent from one another. To examine the statistical significance of those graphs, we applied the statistical convention that any pairs of hypotheses with the BIC differences greater than 2 are considered to be sufficient to conclude significant differences (*Kass and Raftery, 1995*). With this critical value of statistical significance (BIC>2), we found that none of the graphs with the causal arrows between  $c$  and  $s$  could pass the criterion. The closest Markov-equivalent group of graphs (shown at the bottom) was well apart from the winner graph, more by the BIC value of 3. The runners-up were the two Markov-equivalent groups of graphs (the second and third rows). In sum, our model prediction survived the two strong tests: (1) ' $c \rightarrow v \leftarrow s$ ' wins the entire rest of the graph structures in the likelihood battle of causality; (2) the model's fundamental assumption, the independence between  $c$  and  $s$ , was not falsified. These outcomes must not be taken lightly but rather seriously as a strong support for the existence of brain embodiment of the latent variables and their interplay that our model of  $c$  inference predicts.

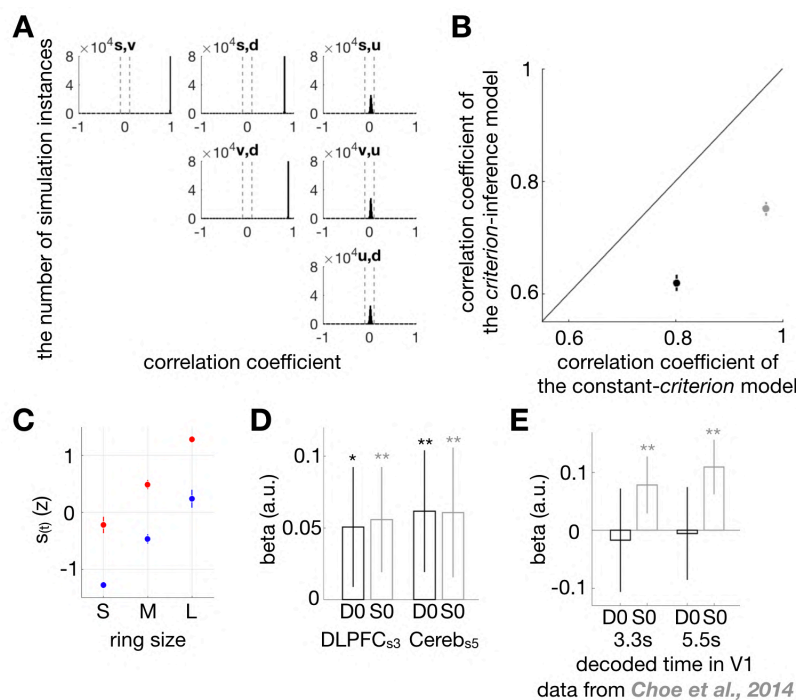

1581  
1582

1583

1584

1585

1586

1587

1588

1589

1590

1591

1592

1593

1594

1595

1596

1597

1598

1599

1600

1601

1602

1603

1604

1605

1606

1607

1608

1609

1610

1611

1612

1613

1614

1615

1616

**Figure 8-figure supplement 1.** Specifications of the latent variables of the criterion-inference model. **(A, B)** To assess how the absence and presence of criterion inference influence the relationships between the remaining latent variables ( $s(t)$ ,  $v(t)$ ,  $d(t)$ , and  $u(t)$ ), we compared the patterns of the pairwise correlations among those variables between the constant-criterion model and the criterion-inference model. To do so, as we did for the criterion-inference model (*Figure 7-figure supplement 1*), we created another group of 18 Bayesian observers by fitting the constant-criterion model separately to the individual human observers, and then acquired the pair-wise correlations based on the simulated data **(A)**. We then pitted the median coefficients of the  $10^6$  simulated correlations and their range (2.5 and 97.5 percentiles) for the constant-criterion model against those for the criterion-inference model **(B)**. Black and gray colors indicate correlations  $r(s, d)$  and  $r(s, v)$ , respectively. By comparing the pairwise correlations, the repercussion of the computational absence of inferred criterion ( $c(t)$ ) was clearly demonstrated; all correlations involving  $s$  were stronger in the constant-criterion model. This implies that, due to the absence of  $c$ ,  $s$  monopolizes the ecology of latent variables constituting the PDM process, making it difficult to determine the contribution of individual constituents and the interplays between them. **(C, D)**  $c(t)$  and  $s(t)$  interplay in PDM on equal computational footings; as  $c(t)$  is an inferred value of the median of external stimuli on trial  $t$  (*Equation 2; Figure 3D*),  $s(t)$  is an inferred value of the stimulus on trial  $t$  (*Equation 1; Figure 3C*). As defined in *Figure 3*, this implies that trial-to-trial measurement noise in the sensory system are substantive and propagate to  $s(t)$ , then to  $v(t)$ , and consequently affect decisions. In line with this, the simulated estimates of  $s(t)$  by the Bayesian observers (see *Figure 7-figure supplement 1* for how these simulations were carried out) differ substantively between the ‘small’-decision (blue dots) and the ‘large’-decision (red dots) trials, as shown in **(C)**. Correspondingly, the brain signals of  $s$  found in the DLPFC and the cerebellum (DLPFC<sub>s3</sub>, Cereb<sub>s5</sub>) also varied not only as a function of external stimuli, but also as a function of decisions made by the observers, as shown in **(D)**. Specifically, the multiple linear regressions ‘DLPFC<sub>s3</sub> (or Cereb<sub>s5</sub>)  $\sim \beta_0 + \beta_{S0}S0 + \beta_{D0}D0$ ’ revealed that  $\beta_{S0}$  and  $\beta_{D0}$  are both significant (DLPFC<sub>s3</sub>:  $\beta_{D0} = 0.051, P_{D0} = 0.017$ ;  $\beta_{S0} = 0.056, P_{S0} = 0.0028$ ; Cereb<sub>s5</sub>:  $\beta_{D0} = 0.062, P_{D0} = 0.0044$ ;  $\beta_{S0} = 0.061, P_{S0} = 0.0084$ ). P-values, \* < 0.05; \*\* < 0.01. Error bars represent 95% GLMM confidence intervals. **(E)** To explore the possibility that  $s$  signals might reside in the early retinotopic visual cortex, we re-analyzed the fMRI data presented in Choe et al. (2014), the experimental procedure and stimuli of which were almost identical to those of the current study except that only the visual cortex was imaged with high spatial resolution. Specifically, we decoded stimulus sizes from the V1 population activity using the fine-retinotopy-based population decoding method used in Choe et al. (2014) and then conducted the same regression analyses that were applied to the brain signals of  $s$  in the DLPFC and the cerebellum (DLPFC<sub>s3</sub>, Cereb<sub>s5</sub>). Unlike DLPFC<sub>s3</sub> and Cereb<sub>s5</sub>, the decoded V1 signal of stimulus size was significantly regressed onto physical stimulus size ( $\beta_{S0} = 0.078, P_{S0} = 0.0018$  at 3.3 s from stimulus onset;  $\beta_{S0} = 0.11, P_{S0} < 10^{-5}$  at 5.5 s from stimulus onset) but not onto decisions made by

1617 observers ( $\beta_{D0} = -0.017$ ,  $P_{D0} = 0.71$  at 3.3 s from stimulus onset;  $\beta_{D0} = -0.0054$ ,  $P_{D0} = 0.90$  at 5.3 s from  
1618 stimulus onset). This implies that the V1 population activity represents physical stimuli robustly but its trial-  
1619 to-trial variability does not seem to be causally involved in determining the trial-to-trial variability in choice,  
1620 which contradicts the property of  $s$  in our model.



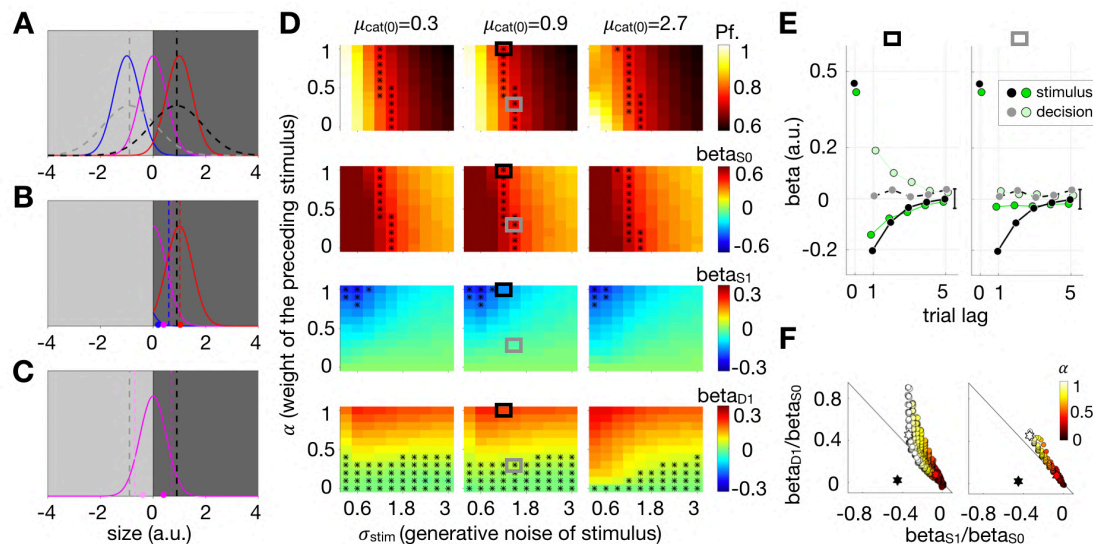

1621  
1622

1623 **Figure 8-figure supplement 2.** The ‘classification’ with a generative model for ‘categorization’ cannot give a  
 1624 coherent account for the history effects of previous stimuli and decisions on current decisions. As stated in  
 1625 the main text, the fundamental feature of the generative model for categorization is that observers  
 1626 assume that (i) there are two category states (‘small’ and ‘large’) and (ii) each category state engenders  
 1627 noisy samples with a respective mean. Norton and his colleagues contrived multiple algorithms by which  
 1628 one can make decisions on which category given samples come from and update the category means in  
 1629 the generative model on a trial-to-trial basis (Norton et al., 2017). They found the best algorithm to be the  
 1630 one whereby, on each trial  $t$ , each of the category means ( $\mu_{large}(t)$  and  $\mu_{small}(t)$ ) is updated by averaging  
 1631 past sensory evidences that were categorized to the corresponding category. For example, a decision on  
 1632 trial  $t$ , if a current sample,  $z(t)$ , is greater than the average of the current category means,  $(\mu_{large}(t) +$   
 1633  $\mu_{small}(t))/2$ , the ‘large’ decision will be made ( $D(t) = \text{‘large’}$ ), and only the mean of the ‘large’ category will  
 1634 be updated such that  $\mu_{large}(t+1) = \alpha z(t) + (1 - \alpha)\mu_{large}(t)$ , where  $\alpha$  is the relative weight given to the  
 1635 current sample, while the mean of the ‘small’ category will remain unchanged ( $\mu_{small}(t+1) = \mu_{small}(t)$ ).  
 1636 Critically, this way of updating the parameters of the generative model, namely, the two category means  
 1637 over trials, make a ‘falsifiable’ prediction about the history effects of previous stimuli and decisions on  
 1638 current decisions, which is qualitatively different from the prediction made by our model. Our model  
 1639 predicted the ‘repulsive’ effects of previous stimuli on current decisions (as indicated by the negative  
 1640 regression weights in Figure 4A) but no effects of previous decisions on current decisions (as indicated by  
 1641 the zero regression weights in Figure 4A). By contrast, the categorization model predicts the ‘repulsive’  
 1642 effects of previous stimuli on current decisions, which is same to ours, but the ‘attractive’ effects of  
 1643 previous decisions on current decisions, which is different from ours.

1644 (A) Hypothetical sampling distributions of noisy stimulus measurements (indicated by colored  
 1645 curves) and a generative model of categorization (represented by gray curves). The blue, purple, and red  
 1646 curves correspond to the measurements generated by the ‘S’, ‘M’, and ‘L’ ring-size stimuli. The generative  
 1647 model for categorization, which is hypothetically assumed to be adopted by observers (instead of the  
 1648 generative model for classification), includes two distributions, one belonging to the ‘large’ category  
 1649 (dashed dark gray curve) and the other to the small category (dashed light gray curve). Vertical dashed  
 1650 lines demarcate the means of these two distributions of the generative model at the moment of trial  $t$ :  
 1651  $\mu_{small}(t)$  and  $\mu_{large}(t)$ . The center of these two means,  $(\mu_{large}(t) + \mu_{small}(t))/2$ , is demarcated by the  
 1652 boundary between the light and dark gray background patches. This boundary can be considered as a  
 1653 decision rule. For example, if a noisy measurement,  $z(t)$ , is located on the dark side, a decision of ‘large’  
 1654 category will be rendered.

1655 (B) An illustration of ‘repulsive’ history effects of previous stimuli on current decisions in the case  
 1656 of ‘large’ decision. Colored dots represent the respective means of noisy measurements sampled from the  
 1657 three ring-size stimuli (labeled by the corresponding colors) which resulted in ‘large’ decisions. According  
 1658 to the categorization model’s algorithm for generative model updating, these noisy measurements will  
 1659 attract the mean of generative-model distributions, as indicated by the vertical dashed lines of the

1660 corresponding colors, which represent the updated means  $\mu_{large}(t+1)$ . Note that  $\mu_{large}(t+1)$  increases as  
1661 the previous stimuli were larger, which results in the ‘repulsive’ decision bias because category boundary,  
1662  $(\mu_{large}(t) + \mu_{small}(t))/2$ , also increases along with  $\mu_{large}(t+1)$ , which will lead to more decisions of ‘small’  
1663 category.

1664 (C) An illustration of ‘attractive’ history effects of previous decisions on current decisions in the  
1665 case of ‘medium’ stimulus. The purple dots of intense and weak colors indicate the means of noisy  
1666 measurements sampled from medium stimulus that resulted in the decisions of ‘large’ and ‘small’  
1667 categories, respectively. Accordingly, the purple vertical dashed lines of intense and weak colors  
1668 demarcate the updated means of the generative-model distributions,  $\mu_{large}(t+1)$  and  $\mu_{small}(t+1)$ ,  
1669 respectively. Consequentially, if the decision on trial  $t$  was ‘large’, then  $\mu_{large}(t+1)$  becomes smaller than  
1670  $\mu_{large}(t)$ , which will lead to more decisions of ‘large’ category, and vice versa. Therefore, unlike the  
1671 stimulus history effects, previous decisions generally tend to attract current decisions.

1672 (D) To confirm the above intuitive predictions by the categorization model, we ran simulation  
1673 experiments while varying the model parameters,  $[\alpha, \sigma_{stim}, \mu_{cat(0)}]$ , within reasonable ranges, where  $\alpha$  is  
1674 the relative weight given to a stimulus sample,  $\sigma_{stim}$  is the generative noise of  $z(t)$ , and  $\mu_{cat(0)}$  is the initial  
1675 mean of the ‘large’ category and the additive reciprocal of the ‘small’ category.  $z(t)$  was sampled from a  
1676 normal distribution with mean  $\in [-1, 0, 1]$ , each represent ‘S’, ‘M’, and ‘L’ rings, respectively, and standard  
1677 deviation  $\sigma_{stim}$ . The stimulus sequences identical to those used in our experiment were used. For each  
1678 triplet of model parameters, we ran 10,000 stimulations and measured the overall performance  
1679 (proportion of correct responses for ‘S’ and ‘L’ stimuli; top row) and regressed current decisions onto  
1680 current stimuli (regression coefficients of  $S_0$  shown in the second row), past stimuli (regression coefficients  
1681 of  $S_i$  in the third row), and past decisions (regression coefficients of  $D_i$  in the bottom row). The asterisks  
1682 mark a constricted set of model parameters with which simulated performances (top row) or regression  
1683 coefficients (second to bottom rows) fell within the 95% bootstrap confidence intervals of the  
1684 corresponding human data that were observed in our experiment. Importantly, two aspects of the  
1685 simulation outcomes indicate the incapability of the categorization model to account for the observed  
1686 history effects of previous stimuli and decisions on current decisions: (1) the coefficients of past stimuli and  
1687 past decisions have opposite signs, which is in conflict with the observed ones; (2) there is no regime of the  
1688 parameter space where performances or regression coefficients are concurrently in line with the observed  
1689 human data.

1690 (E) Temporally extended multiple linear regression results for the two triplets of model  
1691 parameters that were marked by the black (left panel) and gray (right panel) boxes in (D). For comparison,  
1692 the regression coefficients from the simulations (light and dark green circles) are juxtaposed with those  
1693 from the actual experiments (light and dark gray circles, with their average 95% confidence interval shown  
1694 in the right). In line with the outcome shown in (D), the coefficients of past stimuli and decisions deviated  
1695 substantively from the observed ones. One might find the parameter regime at which the simulated  
1696 coefficients for past stimuli fall near to the observed ones. However, in that regime, the simulated  
1697 coefficients for past decisions fall far from the observed ones (left panel). Likewise, one might find the  
1698 parameter regime at which the simulated coefficients for past decisions fall near to the observed ones.  
1699 Now, in that regime, the simulated coefficients for past stimuli fall far from the observed ones (right panel).  
1700 This testifies the fundamental incapability of the categorization model to give a coherent account for the  
1701 observed history effects of past stimuli and past DECISIONS.

1702 (F) The simulated regression coefficients for previous stimuli and previous decisions are plotted  
1703 against one another, after being normalized by those for current stimuli for the comparisons across  
1704 different parameter conditions. The left panel shows the results for the entire set of parameter triplet  
1705 shown in (D), whereas the right panel shows those for the selective set of parameter triplet marked by the  
1706 asterisks in the top panels in (D), where the simulated performances matched the human performances. In  
1707 both of the panels, the warm of color indicates the value of parameter  $\alpha$ . As  $\alpha$  increased, both of the past  
1708 decision and stimulus effects increased. The results for the parameters used in the left and right panels in  
1709 (E) were marked by white and red hexagons respectively. Note that, regardless of  $\alpha$  levels, the simulated  
1710 pairs of past stimuli were stuck around or above the diagonal line and never approached the observed  
1711 coefficients that are shown as the black hexagons at the left bottom corner. Again, this echoes the  
1712 conclusion from (E): the categorization model cannot explain the observed history effects of past stimuli  
1713 and past decisions, which were readily accounted for by our model of  $c$  inference.
